# Supplementary material for: Carbene-Catalyzed Atroposelective Annulation for Quick Access to Axially Chiral Thiazine Derivatives
Source: MDPI journal article supplement (doi:10.3390/molecules28104052), 2023-05-12
Supplement: s1 [file s1]

*Supporting Information*

**Carbene-catalyzed atroposelective annulation for quick access to  
axially chiral thiazine derivatives**

Xiaoqun Yang <sup>1</sup>, Tingting Li <sup>1</sup>, Jinli Chen <sup>1</sup>, Yixian Huang <sup>1</sup>, Tingwei Shen <sup>1</sup>, Shiguang Li <sup>1</sup>,  
Zhichao Jin <sup>1,\*</sup> and Shi-Chao Ren <sup>1,\*</sup>

<sup>1</sup> *National Key Laboratory of Green Pesticides, Key Laboratory of Green Pesticide and Agricultural  
Bioengineering, Ministry of Education, Guizhou University, Huaxi District, Guiyang 550025, China*

*E-mail: [zcjin@gzu.edu.cn](mailto:zcjin@gzu.edu.cn); [scren@gzu.edu.cn](mailto:scren@gzu.edu.cn)*

## Content

|                                                                                       |    |
|---------------------------------------------------------------------------------------|----|
| I. General information.....                                                           | 1  |
| II. Preparation of substrates .....                                                   | 2  |
| III. Conditions optimization for the synthesis of 3a.....                             | 3  |
| IV. General procedure for the catalytic reactions .....                               | 4  |
| V. Proposed reaction mechanism .....                                                  | 5  |
| VI. X-ray crystallography of compound 3h.....                                         | 6  |
| VII. Anti- <i>Xoo</i> activities of the products <i>in vitro</i> .....                | 7  |
| VIII. Characterization of substrates and products.....                                | 9  |
| IX. $^1\text{H}$ NMR, $^{13}\text{C}$ NMR, $^{19}\text{F}$ NMR and HPLC spectra ..... | 27 |

## I. General information

Commercially available materials and dry solvents purchased from Energy Chemical and J&K were used as received. Unless otherwise specified, all reactions were prepared using 4 mL vial. NMR spectra were measured on a Bruker ASCEND (AVANCE III HD 400 MHz) spectrometer. The chemical shift values were corrected to 7.26 ppm ( $^1\text{H}$  NMR) and 77.23 ppm ( $^{13}\text{C}$  NMR) for  $\text{CDCl}_3$  or 3.33 ppm ( $^1\text{H}$  NMR) and 39.51 ppm ( $^{13}\text{C}$  NMR) for  $\text{DMSO}-d_6$ .  $^1\text{H}$  NMR splitting patterns were designated as singlet (s), double (d), triplet (t), quartet (q), doublet of doublets (dd), multiplets (m), and etc. All first-order splitting patterns were assigned on the base of the appearance of the multiplet. Splitting patterns that could not be easily interpreted are designated as multiplet (m) or broad (br). High resolution mass spectrometer analysis (HRMS) was performed on Thermo Fisher Q Exactive mass spectrometer (QTOF mass analyzer). HPLC analyses were measured on Shimadzu Model SIL-20AC220V instruments. Chiralcel brand chiral columns from Daicel Chemical Industries were used with models IA, IB, ODH in 4.6 x 250 mm size. UPLC analyses were measured on Waters systems with Empower3 system controller, Waters UPLC H-Class, and Waters ACQUITY UPLC PDA detector. Chiralcel brand chiral columns from Daicel Chemical Industries were used with models AD-3, OD-3 in 3.0 x 100 mm size. The racemic products used to determine the *er* values were synthesized using racemic catalyst. Optical rotations were measured on an Insmark IP-digi Polarimeter in a 1 dm cuvette. The concentration (*c*) is given in g/100 mL. Melting points were measured on an uncorrected Beijing Tech Instrument X-4 digital display micro melting point apparatus. Single-Crystal *X*-Ray diffraction was recorded at Xcalibur, Eos, Gemini. Analytical thin-layer chromatography (TLC) was carried out on pre-coated silica gel plate (0.2 mm thickness). Visualization was performed using a UV lamp.

## II. Preparation of substrates

### Preparation of thiourea **2**<sup>[1]</sup>

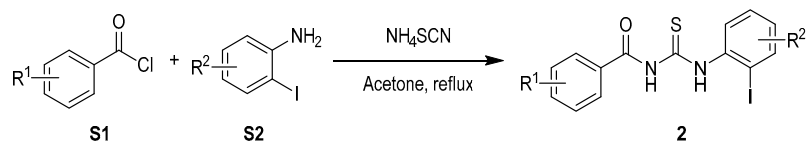

To a solution of  $\text{NH}_4\text{SCN}$  (10.04 mmol, 1.1 equiv.) in acetone (20.0 mL) was added benzoyl chloride (9.13 mmol, 1.0 equiv.) over 5 min and the mixture was refluxed for 15 min. Then a solution of aniline (9.13 mmol, 1.0 equiv.) in acetone (10.0 mL) was added and the reaction was stirred at reflux for an additional 30 min. Then the reaction mixture was poured into ice water with vigorous stirring and the afforded solid was washed with water and cold acetone to give the thiourea **2** with sufficient purity, which was directly used without further purification.

### References:

1. Rodl, C.B.; Vogt, D.; Kretschmer, S.B.; Ihlefeld, K.; Barzen, S.; Bruggerhoff, A.; Achenbach, J.; Proschak, E.; Steinhilber, D.; Stark, H.; Hofmann, B. Multi-dimensional target profiling of N,4-diaryl-1,3-thiazole-2-amines as potent inhibitors of eicosanoid metabolism. *Eur. J. Med. Chem.* **2014**, *84*, 302–311.

### III. Conditions optimization for the synthesis of 3a

**Table S1.** The effects of NHCs, bases, solvents and additives. <sup>[a]</sup>

| Entry             | NHC      | base                            | Solvent            | Additive                                                                                        | Yield (%) <sup>[b]</sup> | e.r. <sup>[c]</sup> |
|-------------------|----------|---------------------------------|--------------------|-------------------------------------------------------------------------------------------------|--------------------------|---------------------|
| 1                 | <b>A</b> | DMAP                            | furan              | -                                                                                               | 30                       | 81:19               |
| 2                 | <b>B</b> | DMAP                            | furan              | -                                                                                               | 29                       | 56:44               |
| 3                 | <b>C</b> | DMAP                            | furan              | -                                                                                               | < 5                      | -                   |
| 4                 | <b>D</b> | DMAP                            | furan              | -                                                                                               | 28                       | 58:42               |
| 5                 | <b>E</b> | DMAP                            | furan              | -                                                                                               | 21                       | 71:29               |
| 6                 | <b>F</b> | DMAP                            | furan              | -                                                                                               | 27                       | 84:16               |
| 7                 | <b>G</b> | DMAP                            | furan              | -                                                                                               | 27                       | 86:14               |
| 8                 | <b>G</b> | Et <sub>3</sub> N               | furan              | -                                                                                               | 12                       | 88:12               |
| 9                 | <b>G</b> | DBU                             | furan              | -                                                                                               | 28                       | 86:14               |
| 10                | <b>G</b> | DABCO                           | furan              | -                                                                                               | < 5                      | -                   |
| 11                | <b>G</b> | Cs <sub>2</sub> CO <sub>3</sub> | furan              | -                                                                                               | 13                       | 86:14               |
| 12                | <b>G</b> | K <sub>3</sub> PO <sub>4</sub>  | furan              | -                                                                                               | 20                       | 86:14               |
| 13                | <b>G</b> | NaHCO <sub>3</sub>              | furan              | -                                                                                               | 20                       | 88:12               |
| 14                | <b>G</b> | DMAP                            | THF                | -                                                                                               | 54                       | 91:9                |
| 15                | <b>G</b> | DMAP                            | DCM                | -                                                                                               | 22                       | 77:23               |
| 16                | <b>G</b> | DMAP                            | EA                 | -                                                                                               | 34                       | 89:11               |
| 17                | <b>G</b> | DMAP                            | Toluene            | -                                                                                               | < 5                      | -                   |
| 18                | <b>G</b> | DMAP                            | 1,4-dioxane        | -                                                                                               | < 5                      | -                   |
| 19                | <b>G</b> | DMAP                            | CH <sub>3</sub> CN | -                                                                                               | < 5                      | -                   |
| 20 <sup>[d]</sup> | <b>G</b> | DMAP                            | THF                | Sc(OTf) <sub>3</sub> / Cu(OTf) <sub>3</sub> / ZnCl <sub>2</sub> / HOAt / MgSO <sub>4</sub> etc. | < 5                      | -                   |
| 21 <sup>[e]</sup> | <b>G</b> | DMAP                            | THF                | 4 Å MS / 5 Å MS                                                                                 | 52                       | 91:9                |

<sup>[a]</sup> Unless otherwise specified, all reactions were carried out at 30 °C using **1a** (0.2 mmol), **2a** (0.1 mmol), pre-NHC catalyst (20 mol%), base (1.0 equiv.), **DQ** (2.0 equiv.) and 2.0 mL solvent for 12 h. <sup>[b]</sup> Isolated yield (after SiO<sub>2</sub> column chromatography purification) based on **2a**. <sup>[c]</sup> The er value were determined by chiral HPLC. <sup>[d]</sup> Additive (100 mol%) was added. <sup>[e]</sup> 4 Å MS / 4 Å MS (150 mg) was added.

## IV. General procedure for the catalytic reactions

### General procedure for the [3 + 3] annulation Reaction

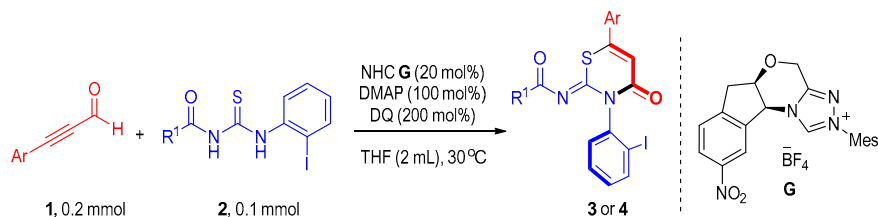

To a 4 mL vial equipped with a magnetic stir bar was added chiral NHC pre-catalyst **G** (0.02 mmol, 9.28 mg), DMAP (0.1 mmol, 12.22 mg), **DQ** (0.2 mmol, 81.73 mg) and substituted thiourea **2** (0.1 mmol). After that, THF (2.0 mL) and ynal **1** (0.2 mmol) was added. Then the reaction mixture was stirred at 30 °C for 12 hours. The solution was then concentrated under reduced pressure, and the residue was subjected to column chromatography (petroleum ether/ethyl acetate = 50/1 to 20/1) directly to obtain the products **3** or **4**.

### General procedure for the synthesis of **3a** at 2.0 mmol scale

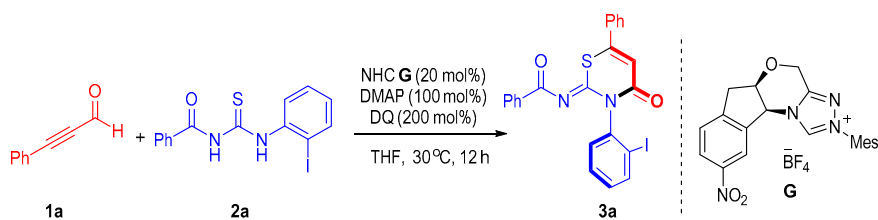

To a 100 mL flame-dry flask equipped with a magnetic stir bar was added triazolium salt **G** (0.4 mmol, 185.69 mg), DMAP (2.0 mmol, 244.34 mg), **DQ** (4.0 mmol, 1.63 g) and thiourea **2a** (2.0 mmol, 764.40 mg). After that, THF (40.0 mL) and ynal **1a** (4.0 mmol, 520.51 mg) was added. Then the reaction mixture was stirred at 30 °C for 12 hours. The solution was then concentrated under reduced pressure, and the residue was subjected to column chromatography (petroleum ether/ethyl acetate = 50/1 to 20/1) directly to obtain the products **3a** (white solid, 530.65 mg, 52% yield, 91:9er).

## V. Proposed reaction mechanism

A plausible reaction mechanism is illustrated in Figure S1. The deprotonated NHC catalyst **G** can add to the ynal **1a** to give the Breslow intermediate **I**, which then can be oxidized to form the acylazolium intermediate **II**. A thio-Michael addition reaction between the intermediate **II** and the deprotonated nucleophilic substrate **2a'** provides the adduct **III**. A subsequent proton transfer process of the intermediate **III** lead to the new acylazolium intermediate **IV**, which then undergoes an intramolecular lactam formation process to afford the atropisomeric thiazine product **3a**, with the regeneration of the NHC catalyst for additional catalytic cycles.

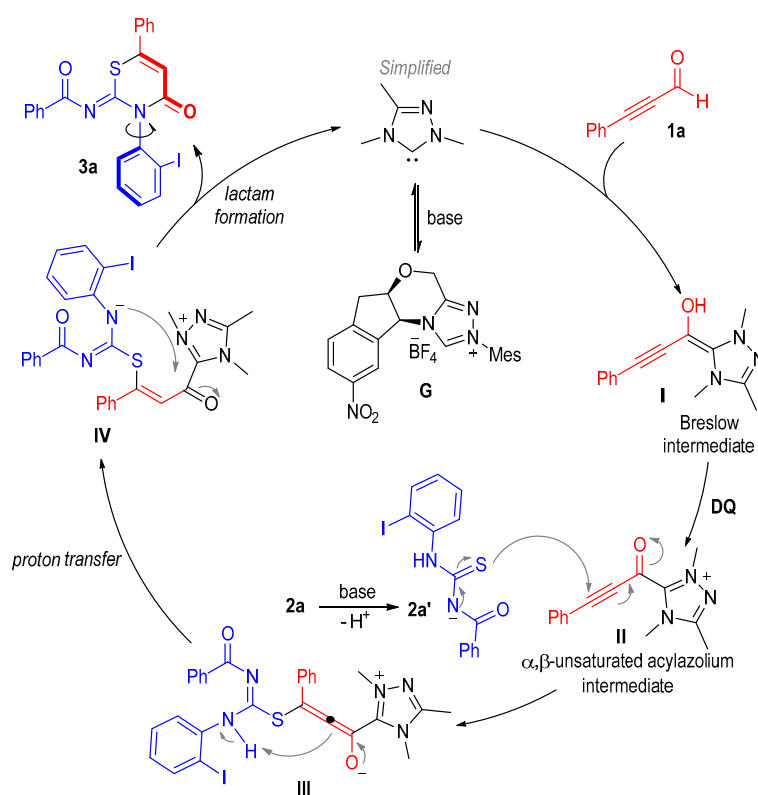

**Figure S1.** Proposed Reaction Mechanism.

## VI. X-ray crystallography of compound 3h

Good quality crystal of **3h** (Colorless block crystal) was obtained by vaporization of an ethyl acetate / petroleum ether solution of compound **3h** (~100 mg). CCDC: **2255058** contains the supplementary crystallographic data for this paper. These data can be obtained free of charge from The Cambridge Crystallographic Data Centre via [www.ccdc.cam.ac.uk/data\\_request/cif](http://www.ccdc.cam.ac.uk/data_request/cif).

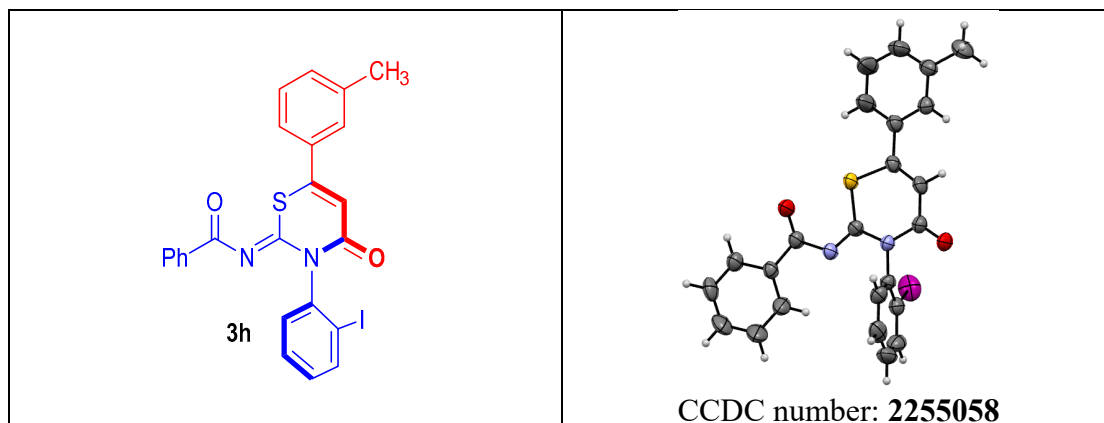

**Crystal Data.**  $C_{24}H_{17}IN_2O_2S$ ,  $M_r = 524.36$ , triclinic, space group P-1 (no. 2),  $a = 9.0249(8)$  Å,  $b = 11.0616(9)$  Å,  $c = 11.1788(11)$  Å,  $\alpha = 87.187(4)^\circ$ ,  $\beta = 80.279(3)^\circ$ ,  $\gamma = 75.740(2)^\circ$ ,  $V = 1066.03(17)$  Å<sup>3</sup>,  $T = 293(2)$  K,  $Z = 2$ ,  $\mu(\text{MoK}\alpha) = 1.623$  mm<sup>-1</sup>,  $D_{\text{calc}} = 1.634$  g/cm<sup>3</sup>, 5168 reflections measured ( $4.72^\circ \leq 2\theta \leq 50.04^\circ$ ), 3697 unique ( $R_{\text{int}} = 0.0253$ ,  $R_{\text{sigma}} = 0.0591$ ) which were used in all calculations. The final  $R_1$  was 0.0516 ( $>2\sigma(I)$ ) and  $wR_2$  was 0.1215 (all data).



## VII. Anti-*Xoo* activities of the products *in vitro*

Antibacterial activities of the target compounds **3** or **4** against *Xanthomonas oryzae* pv. *oryzae* (*Xoo*) *in vitro* were evaluated by using the turbidimeter test, commercial agricultural antibacterial thiodiazole-copper was used as control. The compounds to be measured were dissolved in 150  $\mu$ L of dimethylformamide and diluted with 0.1% (V/V) Tween-20 to prepare two concentrations of 100  $\mu$ g/mL and 50  $\mu$ g/mL. 1 mL of the liquid sample was added to the non-toxic nutrient broth (NB: 1.5 g of beef extract, 2.5 g of peptone, 0.5 g of yeast powder, 5.0 g of glucose and 500 mL of distilled water, pH = 7.0 – 7.2) liquid medium in 4 mL tubes. Then, 40  $\mu$ L of NB containing *Xoo* was added to 5 mL of solvent NB containing the test compounds, thiodiazole-copper. The inoculated test tubes were incubated at (30  $\pm$  1)  $^{\circ}$ C under continuous shaking at 180 rpm for 38 h. The culture growth was monitored spectrophotometric ally by measuring the optical density at 595 nm (OD<sub>595</sub>) and expressed as corrected turbidity. The relative inhibitory rate (*I* %) compared with a blank assay was calculated as follows:

$$\text{Relative inhibitory rate } I (\%) = (C_{\text{tur}} - T_{\text{tur}}) / C_{\text{tur}} \times 100$$

$C_{\text{tur}}$ : the corrected turbidity value of bacterial growth on untreated NB;

$T_{\text{tur}}$ : the corrected turbidity value of bacterial growth on treated NB;

*I*: The relative inhibitory rate.

Each experiment was repeated thrice.

**Table S2.** Antibacterial activities of the products.

| Compound           | <i>Xanthomonas oryzae</i> pv. <i>oryzae</i><br>inhibition ratio (%) |                     |
|--------------------|---------------------------------------------------------------------|---------------------|
|                    | 100 $\mu\text{g/mL}$                                                | 50 $\mu\text{g/mL}$ |
| <b>3a</b>          | 95.4 $\pm$ 2.2                                                      | 54.5 $\pm$ 0.8      |
| <b>3b</b>          | 85.9 $\pm$ 0.2                                                      | 56.6 $\pm$ 2.1      |
| <b>3c</b>          | 87.6 $\pm$ 0.5                                                      | 35.2 $\pm$ 1.6      |
| <b>3d</b>          | 90.1 $\pm$ 1.2                                                      | 50.5 $\pm$ 0.8      |
| <b>3e</b>          | 31.0 $\pm$ 2.4                                                      | 23.6 $\pm$ 2.9      |
| <b>3f</b>          | 64.4 $\pm$ 0.2                                                      | 17.2 $\pm$ 2.1      |
| <b>3g</b>          | 94.9 $\pm$ 0.3                                                      | 89.6 $\pm$ 0.5      |
| <b>3h</b>          | 89.6 $\pm$ 0.6                                                      | 48.6 $\pm$ 0.9      |
| <b>3i</b>          | 54.8 $\pm$ 1.1                                                      | 15.3 $\pm$ 1.7      |
| <b>3j</b>          | 88.3 $\pm$ 1.8                                                      | 23.9 $\pm$ 2.3      |
| <b>3k</b>          | 87.4 $\pm$ 0.4                                                      | 50.2 $\pm$ 0.8      |
| <b>3l</b>          | 85.8 $\pm$ 0.8                                                      | 45.8 $\pm$ 0.8      |
| <b>3m</b>          | 61.8 $\pm$ 1.7                                                      | 17.5 $\pm$ 2.9      |
| <b>3n</b>          | 75.4 $\pm$ 0.9                                                      | 24.9 $\pm$ 1.6      |
| <b>4a</b>          | 66.2 $\pm$ 0.1                                                      | 27.8 $\pm$ 3.5      |
| <b>4b</b>          | 94.7 $\pm$ 0.2                                                      | 87.6 $\pm$ 0.2      |
| <b>4c</b>          | 92.2 $\pm$ 2.3                                                      | 88.6 $\pm$ 1.3      |
| <b>4d</b>          | 87.7 $\pm$ 1.5                                                      | 35.2 $\pm$ 1.1      |
| <b>4e</b>          | 87.1 $\pm$ 0.6                                                      | 67.3 $\pm$ 1.2      |
| <b>4f</b>          | 87.2 $\pm$ 0.5                                                      | 37.4 $\pm$ 2.6      |
| <b>4g</b>          | 61.5 $\pm$ 0.1                                                      | 46.1 $\pm$ 1.0      |
| <b>4h</b>          | 83.2 $\pm$ 2.2                                                      | 43.7 $\pm$ 0.7      |
| <b>4i</b>          | 26.6 $\pm$ 9.2                                                      | 14.3 $\pm$ 0.1      |
| <b>4j</b>          | 62.9 $\pm$ 0.7                                                      | 23.8 $\pm$ 3.2      |
| <b>4k</b>          | 98.3 $\pm$ 0.4                                                      | 46.4 $\pm$ 0.1      |
| <b>4l</b>          | 82.5 $\pm$ 1.3                                                      | 26.6 $\pm$ 2.5      |
| <b>4m</b>          | 83.7 $\pm$ 1.1                                                      | 73.3 $\pm$ 2.1      |
| Thiodiazole-copper | 78.2 $\pm$ 1.7                                                      | 56.5 $\pm$ 1.3      |
| Bismerthiazol      | 95.4 $\pm$ 0.3                                                      | 72.3 $\pm$ 0.9      |

## VIII. Characterization of substrates and products

### *N*-((2-iodophenyl)carbamothioyl)benzamide (2a)

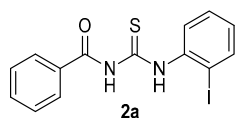

Yellow solid, 82% yield, 4.5 g; m.p. 142 – 144 °C;

**<sup>1</sup>H NMR** (400 MHz, CDCl<sub>3</sub>) δ 12.35 (s, 1H), 9.31 (s, 1H), 7.91 – 7.87 (m, 4H), 7.62 (t, *J* = 7.2 Hz, 1H), 7.51 (t, *J* = 7.6 Hz, 2H), 7.40 (t, *J* = 7.6 Hz, 1H), 7.02 (t, *J* = 7.6 Hz, 1H).

**<sup>13</sup>C NMR** (101 MHz, CDCl<sub>3</sub>) δ 179.7, 166.8, 139.9, 139.5, 133.9, 131.5, 129.2, 129.0, 128.6, 128.0, 127.8, 95.7.

**HRMS** (ESI-TOF) *m/z*: [M+Na]<sup>+</sup> Calcd for C<sub>14</sub>H<sub>11</sub>IN<sub>2</sub>OSNa 404.9528; Found 404.9516.

### *N*-((2-iodophenyl)carbamothioyl)-4-methylbenzamide (2b)

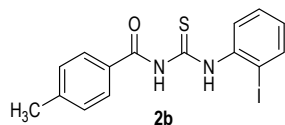

White solid, 90% yield, 3.3 g; m.p. 125 – 127 °C;

**<sup>1</sup>H NMR** (400 MHz, CDCl<sub>3</sub>) δ 12.39 (s, 1H), 9.29 (s, 1H), 7.88 (d, *J* = 8.0 Hz, 2H), 7.79 (d, *J* = 8.0 Hz, 2H), 7.39 (t, *J* = 7.6 Hz, 1H), 7.29 (d, *J* = 7.6 Hz, 2H), 7.00 (t, *J* = 7.6 Hz, 1H), 2.41 (s, 3H).

**<sup>13</sup>C NMR** (101 MHz, CDCl<sub>3</sub>) δ 179.8, 166.7, 144.9, 139.9, 139.5, 129.9 (2C), 129.0, 128.6, 128.0, 127.8, 95.7, 21.8.

**HRMS** (ESI-TOF) *m/z*: [M+Na]<sup>+</sup> Calcd for C<sub>15</sub>H<sub>13</sub>IN<sub>2</sub>OSNa 418.9685; Found 418.9675.

### *N*-((2-iodophenyl)carbamothioyl)-3-methylbenzamide (2c)

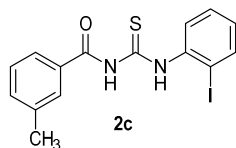

White solid, 93% yield, 3.4 g; m.p. 148 – 150 °C;

**<sup>1</sup>H NMR** (400 MHz, CDCl<sub>3</sub>) δ 12.37 (s, 1H), 9.20 (s, 1H), 7.92 (dd, *J* = 8.0, 1.6 Hz, 2H), 7.75 – 7.70 (m, 2H), 7.47 – 7.41 (m, 3H), 7.04 (td, *J* = 7.6, 1.6 Hz, 1H), 2.45 (s, 3H).

**<sup>13</sup>C NMR** (101 MHz, CDCl<sub>3</sub>) δ 179.7, 167.0, 139.9, 139.5, 139.3, 134.7, 131.5, 129.1, 129.0, 128.6, 128.3, 127.9, 124.7, 95.5, 21.4.

**HRMS** (ESI-TOF) *m/z*: [M+Na]<sup>+</sup> Calcd for C<sub>15</sub>H<sub>13</sub>IN<sub>2</sub>OSNa 418.9685; Found 418.9676.

### *N*-((2-iodophenyl)carbamothioyl)-3-methoxybenzamide (2d)

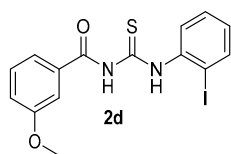

White solid, 47% yield, 1.8 g; m.p. 138 – 140 °C;

**<sup>1</sup>H NMR** (400 MHz, DMSO-*d*<sub>6</sub>) δ 12.45 (s, 1H), 11.80 (s, 1H), 7.95 (dd, *J* = 7.6, 1.4 Hz, 1H), 7.67 (dd, *J* = 8.0, 1.6 Hz, 1H), 7.62 – 7.59 (m, 2H), 7.46 (t,

*J* = 8.0 Hz, 2H), 7.24 (dd, *J* = 8.4, 2.6 Hz, 1H), 7.10 (td, *J* = 7.6, 1.6 Hz, 1H), 3.87 (s, 3H).

**<sup>13</sup>C NMR** (101 MHz, DMSO-*d*<sub>6</sub>) δ 181.1, 168.6, 159.5, 140.8, 139.4, 133.7, 130.2, 129.4, 129.4, 129.1, 121.6, 120.2, 113.7, 98.0, 56.0.

**HRMS** (ESI-TOF) *m/z*: [M+Na]<sup>+</sup> Calcd for C<sub>15</sub>H<sub>13</sub>IN<sub>2</sub>O<sub>2</sub>SNa 434.9635; Found 434.9628.

#### ***N*-((2-iodophenyl)-2-methylbenzamide (2e)**

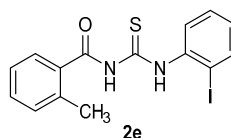

Light white solid, 83% yield, 3.0 g; m.p. 187 – 189 °C;

**<sup>1</sup>H NMR** (400 MHz, DMSO-*d*<sub>6</sub>) δ 12.35 (s, 1H), 11.92 (s, 1H), 7.95 (d, *J* = 6.4 Hz, 1H), 7.71 (d, *J* = 8.0 Hz, 1H), 7.53 (d, *J* = 7.4 Hz, 1H), 7.49 – 7.43

(m, 2H), 7.32 (t, *J* = 7.4 Hz, 2H), 7.12 – 7.08 (m, 1H), 2.45 (s, 3H).

**<sup>13</sup>C NMR** (101 MHz, DMSO-*d*<sub>6</sub>) δ 181.0, 171.2, 140.7, 139.4, 136.5, 134.4, 131.5, 131.2, 129.4, 129.3, 129.1, 128.5, 126.1, 98.0, 20.0.

**HRMS** (ESI-TOF) *m/z*: [M+Na]<sup>+</sup> Calcd for C<sub>15</sub>H<sub>13</sub>IN<sub>2</sub>OSNa 418.9685; Found 418.9679.

#### **4-fluoro-*N*-((2-iodophenyl)carbamothioyl)benzamide (2f)**

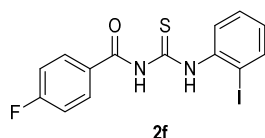

Light brown solid, 81% yield, 3.0 g; m.p. 149 – 151 °C;

**<sup>1</sup>H NMR** (400 MHz, CDCl<sub>3</sub>) δ 12.29 (s, 1H), 9.17 (s, 1H), 7.98 – 7.87 (m, 4H), 7.43 (td, *J* = 7.6, 1.4 Hz, 1H), 7.26 – 7.20 (m, 2H), 7.05 (td, *J* = 7.6,

1.6 Hz, 1H).

**<sup>13</sup>C NMR** (101 MHz, CDCl<sub>3</sub>) δ 179.6, 166.1 (d, *J* = 257.6 Hz), 165.6, 139.8, 139.5, 130.4 (d, *J* = 9.5 Hz), 129.1, 128.7, 127.9, 127.7 (d, *J* = 3.0 Hz), 116.5 (d, *J* = 22.2 Hz), 95.5.

**<sup>19</sup>F NMR** (377 MHz, CDCl<sub>3</sub>) δ -103.3.

**HRMS** (ESI-TOF) *m/z*: [M+Na]<sup>+</sup> Calcd for C<sub>14</sub>H<sub>10</sub>FIN<sub>2</sub>OSNa 422.9435; Found 422.9423.

#### **4-chloro-*N*-((2-iodophenyl)carbamothioyl)benzamide (2g)**

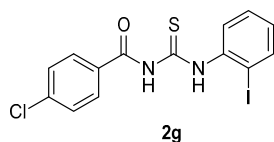

White solid, 78% yield, 3.0 g; m.p. 159 – 161 °C;

**<sup>1</sup>H NMR** (400 MHz, CDCl<sub>3</sub>) δ 12.27 (s, 1H), 9.15 (s, 1H), 7.93 – 7.87 (m, 4H), 7.55 – 7.51 (m, 2H), 7.43 (td, *J* = 7.6, 1.4 Hz, 1H), 7.05 (td, *J* = 7.6, 1.6 Hz, 1H).

**<sup>13</sup>C NMR** (101 MHz, CDCl<sub>3</sub>) δ 179.5, 165.7, 140.5, 139.7, 139.5 (2C), 129.9, 129.6, 129.1, 128.7, 127.9, 95.5.

**HRMS** (ESI-TOF) *m/z*: [M+Na]<sup>+</sup> Calcd for C<sub>14</sub>H<sub>10</sub>ClIN<sub>2</sub>OSNa 438.9139; Found 438.9132.

#### 4-bromo-*N*-((2-iodophenyl)carbamothioyl)benzamide (**2h**)

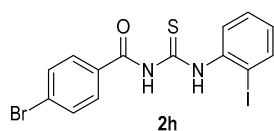

White solid, 92% yield, 3.9 g; m.p. 170 – 172 °C;

**<sup>1</sup>H NMR** (400 MHz, DMSO-*d*<sub>6</sub>) δ 12.35 (s, 1H), 11.90 (s, 1H), 7.96 – 7.93 (m, 3H), 7.77 – 7.74 (m, 2H), 7.66 (dd, *J* = 8.0, 1.6 Hz, 1H), 7.46 (td, *J* = 7.6, 1.4 Hz, 1H), 7.10 (td, *J* = 7.6, 1.6 Hz, 1H).

**<sup>13</sup>C NMR** (101 MHz, DMSO-*d*<sub>6</sub>) δ 181.0, 168.1, 140.8, 139.4, 132.0, 131.6, 131.4, 129.5, 129.3, 129.1, 127.8, 98.0.

**HRMS** (ESI-TOF) *m/z*: [M+Na]<sup>+</sup> Calcd for C<sub>14</sub>H<sub>10</sub>BrIN<sub>2</sub>OSNa 482.8634; Found 482.8625.

#### 3-fluoro-*N*-((2-iodophenyl)carbamothioyl)benzamide (**2i**)

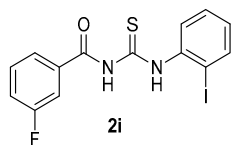

Gray solid, 99% yield, 3.7 g; m.p. 145 – 147 °C;

**<sup>1</sup>H NMR** (400 MHz, CDCl<sub>3</sub>) δ 12.24 (s, 1H), 9.16 (s, 1H), 7.92 (td, *J* = 9.2, 1.6 Hz, 2H), 7.70 – 7.66 (m, 2H), 7.58 – 7.52 (m, 1H), 7.46 – 7.35 (m, 2H), 7.05 (td, *J* = 7.6, 1.6 Hz, 1H).

**<sup>13</sup>C NMR** (101 MHz, CDCl<sub>3</sub>) δ 179.4, 165.5, 163.0 (d, *J* = 250.9 Hz), 139.7, 139.5, 133.8 (d, *J* = 7.1 Hz), 131.0 (d, *J* = 7.9 Hz), 129.1, 128.7, 127.9, 122.9 (d, *J* = 3.0 Hz), 121.0 (d, *J* = 21.2 Hz), 115.3 (d, *J* = 23.6 Hz), 95.5.

**<sup>19</sup>F NMR** (377 MHz, CDCl<sub>3</sub>) δ -109.9.

**HRMS** (ESI-TOF) *m/z*: [M+Na]<sup>+</sup> Calcd for C<sub>14</sub>H<sub>10</sub>FIN<sub>2</sub>OSNa 422.9434; Found 422.9428.

#### 3-chloro-*N*-((2-iodophenyl)carbamothioyl)benzamide (**2j**)

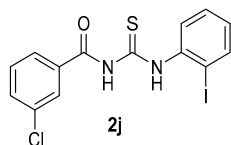

White solid, 93% yield, 3.6 g; m.p. 159 – 161 °C;

**<sup>1</sup>H NMR** (400 MHz, CDCl<sub>3</sub>) δ 12.23 (s, 1H), 9.16 (s, 1H), 7.96 – 7.90 (m, 3H), 7.80 – 7.78 (m, 1H), 7.65 – 7.62 (m, 1H), 7.52 – 7.42 (m, 2H), 7.05 (td,  $J = 7.6, 1.6$  Hz, 1H).

**<sup>13</sup>C NMR** (101 MHz, CDCl<sub>3</sub>) δ 179.4, 165.4, 139.7, 139.5, 135.7, 133.9, 133.3, 130.5, 129.1, 128.7, 128.2, 127.9, 125.5, 95.5.

**HRMS** (ESI-TOF) m/z: [M+Na]<sup>+</sup> Calcd for C<sub>14</sub>H<sub>10</sub>ClIN<sub>2</sub>OSNa 438.9139; Found 438.9135.

### 3-bromo-*N*-((2-iodophenyl)carbamothioyl)benzamide (**2k**)

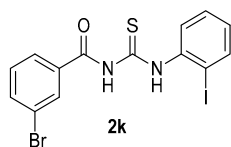

Yellow solid, 76% yield, 3.2 g; m.p. 149 – 151 °C;

**<sup>1</sup>H NMR** (400 MHz, DMSO-*d*<sub>6</sub>) δ 12.32 (s, 1H), 11.96 (s, 1H), 8.20 (t,  $J = 1.6$  Hz, 1H), 8.01 – 7.97 (m, 1H), 7.94 (dd,  $J = 8.0, 1.2$  Hz, 1H), 7.88 – 7.85 (m, 1H), 7.67 (dd,  $J = 7.8, 1.4$  Hz, 1H), 7.53 – 7.44 (m, 2H), 7.10 (td,  $J = 7.6, 1.6$  Hz, 1H).

**<sup>13</sup>C NMR** (101 MHz, DMSO-*d*<sub>6</sub>) δ 180.9, 167.5, 140.8, 139.4, 136.3, 134.6, 131.9, 131.1, 129.5, 129.3, 129.1, 128.4, 122.0, 98.0.

**HRMS** (ESI-TOF) m/z: [M+Na]<sup>+</sup> Calcd for C<sub>14</sub>H<sub>10</sub>BrIN<sub>2</sub>OSNa 482.8634; Found 482.8628.

### 2-fluoro-*N*-((2-iodophenyl)carbamothioyl)benzamide (**2l**)

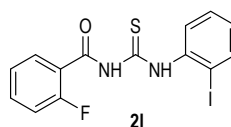

Light brown solid, 92% yield, 3.4 g; m.p. 151 – 153 °C;

**<sup>1</sup>H NMR** (400 MHz, CDCl<sub>3</sub>) δ 12.29 (s, 1H), 9.77 (d,  $J = 15.6$  Hz, 1H), 8.16 (td,  $J = 7.6, 2.0$  Hz, 1H), 7.94 – 7.91 (m, 2H), 7.68 – 7.62 (m, 1H), 7.43 (td,  $J = 7.6, 1.4$  Hz, 1H), 7.37 (td,  $J = 7.6, 1.2$  Hz, 1H), 7.28 – 7.22 (m, 1H), 7.04 (td,  $J = 7.6, 1.6$  Hz, 1H).

**<sup>13</sup>C NMR** (101 MHz, CDCl<sub>3</sub>) δ 179.4, 162.9, 160.6 (d,  $J = 251.7$  Hz), 139.8, 139.5, 136.0 (d,  $J = 9.6$  Hz), 132.4, 129.0, 128.6, 128.0, 125.5 (d,  $J = 3.1$  Hz), 118.9 (d,  $J = 9.5$  Hz), 116.8 (d,  $J = 24.7$  Hz), 95.5.

**<sup>19</sup>F NMR** (377 MHz, CDCl<sub>3</sub>) δ -110.9.

**HRMS** (ESI-TOF) m/z: [M+Na]<sup>+</sup> Calcd for C<sub>14</sub>H<sub>10</sub>FIN<sub>2</sub>OSNa 422.9435; Found 422.9425.

**2-chloro-*N*-((2-iodophenyl)carbamothioyl)benzamide (2m)**

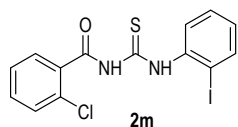

White solid, 85% yield, 3.2 g; m.p. 189 – 191 °C;

**<sup>1</sup>H NMR** (400 MHz, DMSO-*d*<sub>6</sub>) δ 12.16 (s, 1H), 12.12 (s, 1H), 7.96 (dd, *J* = 8.0, 1.4 Hz, 1H), 7.69 (dd, *J* = 8.0, 1.6 Hz, 1H), 7.64 (dd, *J* = 7.4, 1.6 Hz, 1H), 7.60 – 7.54 (m, 2H), 7.49 – 7.45 (m, 2H), 7.10 (td, *J* = 7.6, 1.6 Hz, 1H).

**<sup>13</sup>C NMR** (101 MHz, DMSO-*d*<sub>6</sub>) δ 180.6, 168.3, 140.7, 139.4, 134.7, 132.7, 130.5, 130.1, 129.8, 129.5, 129.3, 129.1, 127.7, 98.0.

**HRMS** (ESI-TOF) *m/z*: [M+Na]<sup>+</sup> Calcd for C<sub>14</sub>H<sub>10</sub>ClIN<sub>2</sub>OSNa 438.9139; Found 438.9132.

**2-bromo-*N*-((2-iodophenyl)carbamothioyl)benzamide (2n)**

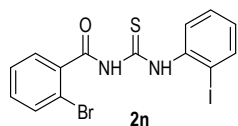

Light pink solid, 82% yield, 3.5 g; m.p. 201 – 203 °C;

**<sup>1</sup>H NMR** (400 MHz, DMSO-*d*<sub>6</sub>) δ 12.16 (s, 1H), 12.12 (s, 1H), 7.95 (dd, *J* = 8.0, 1.4 Hz, 1H), 7.73 (dd, *J* = 7.6, 1.4 Hz, 1H), 7.69 (dd, *J* = 8.0, 1.6 Hz, 1H), 7.60 (dd, *J* = 7.4, 2.0 Hz, 1H), 7.54 – 7.44 (m, 3H), 7.10 (td, *J* = 7.6, 1.6 Hz, 1H).

**<sup>13</sup>C NMR** (101 MHz, DMSO-*d*<sub>6</sub>) δ 180.6, 169.1, 140.6, 139.4, 136.9, 133.1, 132.6, 129.6, 129.4, 129.1, 129.0, 128.0, 119.4, 97.7.

**HRMS** (ESI-TOF) *m/z*: [M+Na]<sup>+</sup> Calcd for C<sub>14</sub>H<sub>10</sub>BrIN<sub>2</sub>OSNa 482.8634; Found 482.8629.

**(*Z*)-*N*-(3-(2-iodophenyl)-4-oxo-6-phenyl-3,4-dihydro-2*H*-1,3-thiazin-2-ylidene)benzamide (3a)**

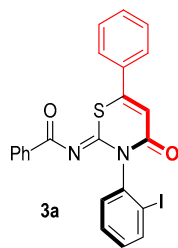

White solid, 54% yield, 27.5 mg; m.p. 134 – 136 °C;

**[α]<sub>D</sub><sup>23</sup>** = +54.3 (*c* = 0.5 in CHCl<sub>3</sub>);

**<sup>1</sup>H NMR** (400 MHz, CDCl<sub>3</sub>) δ 8.04 (dd, *J* = 8.0, 1.4 Hz, 1H), 7.81 – 7.78 (m, 2H), 7.72 – 7.69 (m, 2H), 7.58 – 7.45 (m, 5H), 7.35 – 7.31 (m, 3H), 7.22 (td, *J* = 7.6, 1.6 Hz, 1H), 6.94 (s, 1H).

**<sup>13</sup>C NMR** (101 MHz, CDCl<sub>3</sub>) δ 175.6, 161.8, 160.4, 151.6, 141.4, 140.0, 135.0, 134.4, 133.1, 131.8, 130.13, 130.11, 129.7, 129.4, 129.1, 128.3, 126.8, 115.8, 98.0.

**HRMS** (ESI-TOF) *m/z*: [M+Na]<sup>+</sup> Calcd for C<sub>23</sub>H<sub>15</sub>IN<sub>2</sub>O<sub>2</sub>SNa 532.9791; Found 532.9786.

**UPLC analysis**: 91:9 *er* (OD-3 column, 25 °C, hexane / <sup>i</sup>PrOH = 80 / 20, 0.5 mL / min, λ = 254 nm),

*Rt* (major) = 25.9 min, *Rt* (minor) = 33.1 min.

**(Z)-N-(3-(2-iodophenyl)-6-(4-methoxyphenyl)-4-oxo-3,4-dihydro-2H-1,3-thiazin-2-ylidene)benzamide (3b)**

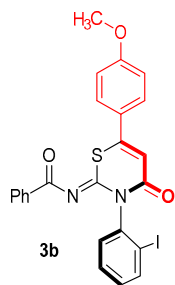

White solid, 78% yield, 42.3 mg; m.p. 118 – 120 °C;

$[\alpha]_D^{27} = +52.5$  ( $c = 1.0$  in  $\text{CHCl}_3$ );

**$^1\text{H NMR}$**  (400 MHz,  $\text{CDCl}_3$ )  $\delta$  8.03 (dd,  $J = 8.0, 1.4$  Hz, 1H), 7.82 – 7.79 (m, 2H), 7.69 – 7.65 (m, 2H), 7.55 (td,  $J = 7.6, 1.4$  Hz, 1H), 7.49 – 7.45 (m, 1H), 7.35 – 7.31 (m, 3H), 7.21 (td,  $J = 7.6, 1.6$  Hz, 1H), 7.03 – 7.0 (m, 2H), 6.88 (s, 1H), 3.88

(s, 3H).

**$^{13}\text{C NMR}$**  (101 MHz,  $\text{CDCl}_3$ )  $\delta$  175.6, 162.6, 162.0, 160.4, 150.9, 141.5, 139.8, 135.1, 133.0, 130.11, 130.05, 129.6, 129.2, 128.4, 128.3, 126.5, 114.8, 113.9, 98.1, 55.6.

**HRMS** (ESI-TOF)  $m/z$ :  $[\text{M}+\text{Na}]^+$  Calcd for  $\text{C}_{24}\text{H}_{17}\text{IN}_2\text{O}_3\text{SNa}$  562.9897; Found 562.9892.

**HPLC analysis**: 86:14 er (AD-3 column, 25 °C, hexane /  $i$ PrOH = 80 / 20, 0.5 mL / min,  $\lambda = 254$  nm),  $R_t$  (major) = 35.2 min,  $R_t$  (minor) = 42.3 min.

**(Z)-N-(3-(2-iodophenyl)-4-oxo-6-(*p*-tolyl)-3,4-dihydro-2H-1,3-thiazin-2-ylidene)benzamide (3c)**

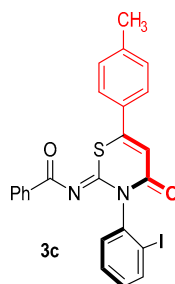

White solid, 76% yield, 40.0 mg; m.p. 156 – 158 °C;

$[\alpha]_D^{25} = +17.3$  ( $c = 1.0$  in  $\text{CHCl}_3$ );

**$^1\text{H NMR}$**  (400 MHz,  $\text{CDCl}_3$ )  $\delta$  8.04 (dd,  $J = 8.0, 1.4$  Hz, 1H), 7.78 – 7.76 (m, 2H), 7.57 (td,  $J = 7.6, 1.4$  Hz, 1H), 7.49 – 7.44 (m, 1H), 7.39 – 7.29 (m, 7H), 7.22 (td,  $J = 7.6, 1.6$  Hz, 1H), 6.64 (s, 1H), 2.46 (s, 3H).

**$^{13}\text{C NMR}$**  (101 MHz,  $\text{CDCl}_3$ )  $\delta$  175.6, 161.5, 153.0, 141.5, 139.9, 135.6, 135.0, 134.1, 133.1, 131.1, 130.6, 130.1, 129.7, 129.2, 128.6, 128.3, 126.4, 119.2, 98.0, 19.9.

**HRMS** (ESI-TOF)  $m/z$ :  $[\text{M}+\text{Na}]^+$  Calcd for  $\text{C}_{24}\text{H}_{17}\text{IN}_2\text{O}_2\text{SNa}$  546.9948; Found 546.9941.

**HPLC analysis**: 82:18 er (IB column, 25 °C, hexane /  $i$ PrOH = 80 / 20, 0.5 mL / min,  $\lambda = 254$  nm),  $R_t$  (major) = 24.4 min,  $R_t$  (minor) = 25.9 min.

**(Z)-N-(6-(4-fluorophenyl)-3-(2-iodophenyl)-4-oxo-3,4-dihydro-2H-1,3-thiazin-2-ylidene)benzamide (3d)**



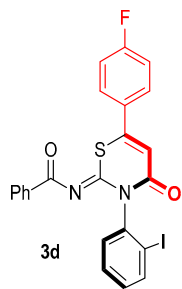

White solid, 61% yield, 32.2 mg; m.p. 216 – 218 °C;

$[\alpha]^{24}_{\text{D}} = +24.0$  ( $c = 1.0$  in  $\text{CHCl}_3$ );

**$^1\text{H NMR}$**  (400 MHz,  $\text{CDCl}_3$ )  $\delta$  8.04 (dd,  $J = 8.0, 1.4$  Hz, 1H), 7.81 – 7.78 (m, 2H), 7.73 – 7.68 (m, 2H), 7.56 (td,  $J = 7.6, 1.4$  Hz, 1H), 7.50 – 7.46 (m, 1H), 7.35 – 7.31 (m, 3H), 7.24 – 7.19 (m, 3H), 6.89 (s, 1H).

**$^{13}\text{C NMR}$**  (101 MHz,  $\text{CDCl}_3$ )  $\delta$  175.6, 164.8 (d,  $J = 255.3$  Hz), 161.7, 160.0, 150.4, 141.3, 139.9, 134.9, 133.2, 130.58, 130.6 (d,  $J = 3.1$  Hz), 130.1, 129.7, 129.1 (d,  $J = 4.2$  Hz), 129.0, 128.3, 116.7 (d,  $J = 22.4$  Hz), 115.8, 98.0.

**$^{19}\text{F NMR}$**  (377 MHz,  $\text{CDCl}_3$ )  $\delta$  -107.0.

**HRMS** (ESI-TOF)  $m/z$ :  $[\text{M}+\text{Na}]^+$  Calcd for  $\text{C}_{23}\text{H}_{14}\text{FIN}_2\text{O}_2\text{SNa}$  550.9697; Found 550.9698.

**HPLC analysis**: 88:12 er (IA column, 25 °C, hexane /  $^i\text{PrOH} = 80 / 20$ , 0.5 mL / min,  $\lambda = 254$  nm),  $R_t$  (major) = 45.6 min,  $R_t$  (minor) = 48.8 min

**(Z)-N-(6-(4-chlorophenyl)-3-(2-iodophenyl)-4-oxo-3,4-dihydro-2H-1,3-thiazin-2-ylidene)benzamide (3e)**

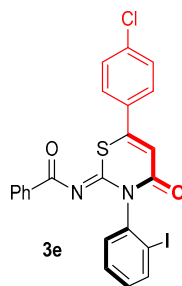

White solid, 57% yield, 31.2 mg; m.p. 180 – 182 °C;

$[\alpha]^{25}_{\text{D}} = +22.6$  ( $c = 1.0$  in  $\text{CHCl}_3$ );

**$^1\text{H NMR}$**  (400 MHz,  $\text{CDCl}_3$ )  $\delta$  8.04 (dd,  $J = 8.0, 1.4$  Hz, 1H), 7.80 – 7.78 (m, 2H), 7.66 – 7.63 (m, 2H), 7.56 (td,  $J = 7.8, 1.4$  Hz, 1H), 7.51 – 7.46 (m, 3H), 7.35 – 7.31 (m, 3H), 7.22 (td,  $J = 7.8, 1.6$  Hz, 1H), 6.91 (s, 1H).

**$^{13}\text{C NMR}$**  (101 MHz,  $\text{CDCl}_3$ )  $\delta$  175.6, 161.6, 160.0, 150.3, 141.3, 139.9, 138.2, 134.9, 133.2, 132.8, 130.2, 130.1, 129.8, 129.7, 129.1, 128.3, 128.1, 116.0, 98.0.

**HRMS** (ESI-TOF)  $m/z$ :  $[\text{M}+\text{Na}]^+$  Calcd for  $\text{C}_{23}\text{H}_{14}\text{ClIN}_2\text{O}_2\text{SNa}$  566.9401; Found 566.9391.

**HPLC analysis**: 90:10 er (IB column, 25 °C, hexane /  $^i\text{PrOH} = 80 / 20$ , 0.5 mL / min,  $\lambda = 254$  nm),  $R_t$  (major) = 36.7 min,  $R_t$  (minor) = 40.1 min.

**(Z)-N-(6-(4-bromophenyl)-3-(2-iodophenyl)-4-oxo-3,4-dihydro-2H-1,3-thiazin-2-ylidene)benzamide (3f)**

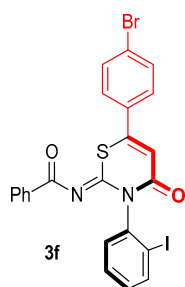

White solid, 48% yield, 28.2 mg; m.p. 94 – 96 °C;

$[\alpha]^{22}_D = +10.0$  ( $c = 1.0$  in  $\text{CHCl}_3$ );

**$^1\text{H NMR}$**  (400 MHz,  $\text{CDCl}_3$ )  $\delta$  8.04 (dd,  $J = 8.0, 1.4$  Hz, 1H), 7.80 – 7.78 (m, 2H), 7.67 – 7.64 (m, 2H), 7.59 – 7.54 (m, 3H), 7.50 – 7.46 (m, 1H), 7.35 – 7.31 (m, 3H), 7.22 (td,  $J = 7.6, 1.6$  Hz, 1H), 6.91 (s, 1H).

**$^{13}\text{C NMR}$**  (101 MHz,  $\text{CDCl}_3$ )  $\delta$  175.6, 161.6, 160.0, 150.4, 141.3, 139.9, 134.9, 133.3, 133.2, 132.7, 130.2, 130.1, 129.7, 129.1, 128.3, 128.2, 126.6, 116.0, 98.0.

**HRMS** (ESI-TOF)  $m/z$ :  $[\text{M}+\text{Na}]^+$  Calcd for  $\text{C}_{23}\text{H}_{14}\text{BrIN}_2\text{O}_2\text{SNa}$  610.8896; Found 610.8893.

**UPLC analysis**: 92:8 er (AD-3 column, 25 °C, hexane /  $i$ PrOH = 80 / 20, 0.5 mL / min,  $\lambda = 254$  nm),  $R_t$  (major) = 46.2 min,  $R_t$  (minor) = 49.9 min.

**(Z)-N-(3-(2-iodophenyl)-6-(3-methoxyphenyl)-4-oxo-3,4-dihydro-2H-1,3-thiazin-2-ylidene)benzamide (3g)**

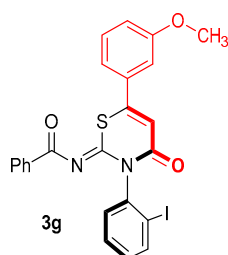

White solid, 66% yield, 35.8 mg; m.p. 118 – 120 °C;

$[\alpha]^{26}_D = +15.5$  ( $c = 1.0$  in  $\text{CHCl}_3$ );

**$^1\text{H NMR}$**  (400 MHz,  $\text{CDCl}_3$ )  $\delta$  8.04 (dd,  $J = 8.0, 1.4$  Hz, 1H), 7.81 – 7.78 (m, 2H), 7.55 (dd,  $J = 7.8, 1.4$  Hz, 1H), 7.50 – 7.45 (m, 1H), 7.42 (t,  $J = 8.0$  Hz, 1H), 7.37 – 7.27 (m, 4H), 7.24 – 7.18 (m, 2H), 7.10 – 7.07 (m, 1H), 6.93 (s, 1H), 3.88 (s, 3H).

**$^{13}\text{C NMR}$**  (101 MHz,  $\text{CDCl}_3$ )  $\delta$  175.5, 161.8, 160.34, 160.25, 151.6, 141.4, 139.9 (2C), 135.7, 135.0, 133.1, 130.5, 130.1, 129.7, 129.1, 128.3, 119.2, 117.7, 115.9, 111.9, 98.0, 55.6.

**HRMS** (ESI-TOF)  $m/z$ :  $[\text{M}+\text{Na}]^+$  Calcd for  $\text{C}_{24}\text{H}_{17}\text{IN}_2\text{O}_3\text{SNa}$  562.9897; Found 562.9886.

**HPLC analysis**: 87:13 er (IB column, 25 °C, hexane /  $i$ PrOH = 80 / 20, 0.5 mL / min,  $\lambda = 254$  nm),  $R_t$  (major) = 27.0 min,  $R_t$  (minor) = 32.6 min.

**(Z)-N-(3-(2-iodophenyl)-4-oxo-6-(*m*-tolyl)-3,4-dihydro-2H-1,3-thiazin-2-ylidene)benzamide (3h)**

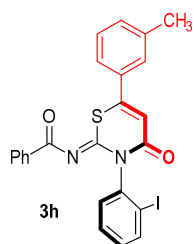

White solid, 53% yield, 27.8 mg; m.p. 206 – 208 °C;

$[\alpha]_D^{23} = +24.0$  ( $c = 1.0$  in  $\text{CHCl}_3$ );

**$^1\text{H NMR}$**  (400 MHz,  $\text{CDCl}_3$ )  $\delta$  8.04 (dd,  $J = 8.0, 1.4$  Hz, 1H), 7.82 – 7.79 (m, 2H), 7.56 (td,  $J = 7.8, 1.4$  Hz, 1H), 7.51 – 7.45 (m, 3H), 7.39 – 7.31 (m, 5H), 7.21 (td,  $J = 7.8, 1.6$  Hz, 1H), 6.92 (s, 1H), 2.44 (s, 3H).

**$^{13}\text{C NMR}$**  (101 MHz,  $\text{CDCl}_3$ )  $\delta$  175.6, 161.8, 160.5, 151.8, 141.5, 139.9, 139.4, 135.0, 134.3, 133.1, 132.6, 130.12, 130.09, 129.7, 129.3, 129.1, 128.3, 127.4, 123.9, 115.6, 98.1, 21.4.

**HRMS** (ESI-TOF)  $m/z$ :  $[\text{M}+\text{Na}]^+$  Calcd for  $\text{C}_{24}\text{H}_{17}\text{IN}_2\text{O}_2\text{SNa}$  546.9947; Found 546.9944.

**HPLC analysis**: 97:3 er (ODH column, 25 °C, hexane /  $i$ PrOH = 80 / 20, 0.5 mL / min,  $\lambda = 254$  nm),  $R_t$  (major) = 35.4 min,  $R_t$  (minor) = 38.5 min.

**(Z)-N-(6-(3-fluorophenyl)-3-(2-iodophenyl)-4-oxo-3,4-dihydro-2H-1,3-thiazin-2-ylidene)benzamide (3i)**

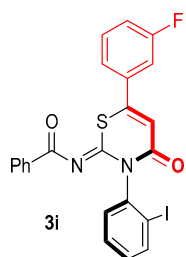

White solid, 65% yield, 34.4 mg; m.p. 162 – 164 °C;

$[\alpha]_D^{24} = +10.0$  ( $c = 1.0$  in  $\text{CHCl}_3$ );

**$^1\text{H NMR}$**  (400 MHz,  $\text{CDCl}_3$ )  $\delta$  8.04 (dd,  $J = 8.0, 1.4$  Hz, 1H), 7.80 – 7.78 (m, 2H), 7.57 (td,  $J = 7.8, 1.4$  Hz, 1H), 7.51 – 7.46 (m, 3H), 7.43 – 7.39 (m, 1H), 7.35 – 7.31 (m, 3H), 7.25 – 7.20 (m, 2H), 6.92 (s, 1H).

**$^{13}\text{C NMR}$**  (101 MHz,  $\text{CDCl}_3$ )  $\delta$  175.6, 163.0 (d,  $J = 250.7$ , Hz), 161.5, 160.0, 150.2, 141.3, 139.9, 136.4 (d,  $J = 7.9$  Hz), 134.9, 133.2, 131.2 (d,  $J = 4.2$  Hz), 130.19, 130.15, 129.7, 129.1, 128.3, 122.6 (d,  $J = 3.0$  Hz), 118.8 (d,  $J = 21.1$  Hz), 116.5, 114.0 (d,  $J = 23.9$  Hz), 98.0.

**$^{19}\text{F NMR}$**  (377 MHz,  $\text{CDCl}_3$ )  $\delta$  -110.3.

**HRMS** (ESI-TOF)  $m/z$ :  $[\text{M}+\text{Na}]^+$  Calcd for  $\text{C}_{23}\text{H}_{14}\text{FIN}_2\text{O}_2\text{SNa}$  550.9697; Found 550.9687.

**HPLC analysis**: 97:3 er (ODH column, 25 °C, hexane /  $i$ PrOH = 80 / 20, 0.5 mL / min,  $\lambda = 254$  nm),  $R_t$  (minor) = 45.0 min,  $R_t$  (major) = 47.1 min.

**(Z)-N-(3-(2-iodophenyl)-4-oxo-6-(*o*-tolyl)-3,4-dihydro-2H-1,3-thiazin-2-ylidene)benzamide (3j)**

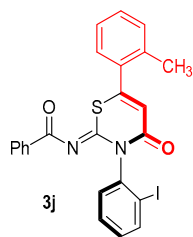

White solid, 53% yield, 28.0 mg; m.p. 160 – 162 °C;

$[\alpha]^{25}_{\text{D}} = +19.3$  ( $c = 1.0$  in  $\text{CHCl}_3$ );

**$^1\text{H NMR}$**  (400 MHz,  $\text{CDCl}_3$ )  $\delta$  8.04 (dd,  $J = 8.0, 1.4$  Hz, 1H), 7.78 – 7.76 (m, 2H), 7.57 (td,  $J = 7.4, 1.2$  Hz, 1H), 7.49 – 7.44 (m, 1H), 7.38 – 7.31 (m, 7H), 7.22 (td,  $J = 7.8, 1.6$  Hz, 1H), 6.64 (s, 1H), 2.46 (s, 3H).

**$^{13}\text{C NMR}$**  (101 MHz,  $\text{CDCl}_3$ )  $\delta$  175.6, 161.5, 161.2, 153.0, 141.5, 139.9 (2C), 135.6, 135.0, 134.1, 133.1, 131.1, 130.6, 130.1, 129.7, 129.2, 128.6, 128.3, 126.4, 119.2, 98.0, 19.9.

**HRMS** (ESI-TOF)  $m/z$ :  $[\text{M}+\text{Na}]^+$  Calcd for  $\text{C}_{24}\text{H}_{17}\text{IN}_2\text{O}_2\text{SNa}$  546.9948; Found 546.9941.

**UPLC analysis**: 97:3 er (OD-3 column, 25 °C, hexane / iPrOH = 80 / 20, 0.5 mL / min,  $\lambda = 254$  nm), Rt (minor) = 14.7 min, Rt (major) = 17.3 min.

**(Z)-N-(6-(2-fluorophenyl)-3-(2-iodophenyl)-4-oxo-3,4-dihydro-2H-1,3-thiazin-2-ylidene)benzamide (3k)**

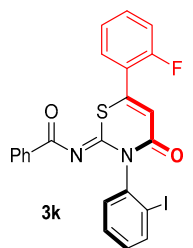

White solid, 48% yield, 25.8 mg; m.p. 114 – 116 °C;

$[\alpha]^{25}_{\text{D}} = +10.2$  ( $c = 1.0$  in  $\text{CHCl}_3$ );

**$^1\text{H NMR}$**  (400 MHz,  $\text{CDCl}_3$ )  $\delta$  8.04 (dd,  $J = 8.0, 1.4$  Hz, 1H), 7.79 – 7.77 (m, 2H), 7.63 – 7.45 (m, 4H), 7.36 – 7.29 (m, 4H), 7.25 – 7.20 (m, 2H), 6.95 (d,  $J = 1.0$  Hz, 1H).

**$^{13}\text{C NMR}$**  (101 MHz,  $\text{CDCl}_3$ )  $\delta$  175.6, 161.4, 160.6, 159.4 (d,  $J = 258.5$  Hz), 146.0, 141.4, 139.9, 134.9, 133.1, 133.0, 130.1, 129.7, 129.1, 128.3, 125.0 (d,  $J = 3.6$  Hz), 124.2, 123.6, 122.4 (d,  $J = 6.55$  Hz), 119.8 (d,  $J = 5.6$  Hz), 117.0 (d,  $J = 21.9$  Hz), 98.0.

**$^{19}\text{F NMR}$**  (377 MHz,  $\text{CDCl}_3$ )  $\delta$  -112.4.

**HRMS** (ESI-TOF)  $m/z$ :  $[\text{M}+\text{Na}]^+$  Calcd for  $\text{C}_{23}\text{H}_{14}\text{FIN}_2\text{O}_2\text{SNa}$  550.9697; Found 550.9682.

**UPLC analysis**: 91:9 er (AD-3 column, 25 °C, hexane / iPrOH = 80 / 20, 0.5 mL / min,  $\lambda = 254$  nm), Rt (minor) = 35.4 min, Rt (major) = 47.6 min.

**(Z)-N-(6-(2-chlorophenyl)-3-(2-iodophenyl)-4-oxo-3,4-dihydro-2H-1,3-thiazin-2-ylidene)benzamide (3l)**

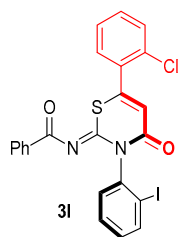

Yellow solid, 42% yield, 23.0 mg; m.p. 168 – 170 °C;

$[\alpha]^{24}_{\text{D}} = +9.0$  ( $c = 1.0$  in  $\text{CHCl}_3$ );

**$^1\text{H NMR}$**  (400 MHz,  $\text{CDCl}_3$ )  $\delta$  8.05 (dd,  $J = 8.0, 1.4$  Hz, 1H), 7.78 – 7.75 (m, 2H), 7.60 – 7.30 (m, 9H), 7.23 (td,  $J = 7.8, 1.6$  Hz, 1H), 6.77 (s, 1H).

**$^{13}\text{C NMR}$**  (101 MHz,  $\text{CDCl}_3$ )  $\delta$  175.6, 161.4, 161.2, 150.0, 141.4, 139.9, 134.9, 133.3, 133.1, 132.4, 131.8, 130.7, 130.24, 130.16, 130.1, 129.7, 129.1, 128.3, 127.4, 120.5, 98.0.

**HRMS** (ESI-TOF)  $m/z$ :  $[\text{M}+\text{Na}]^+$  Calcd for  $\text{C}_{23}\text{H}_{14}\text{ClIN}_2\text{O}_2\text{SNa}$  566.9401; Found 566.9395.

**HPLC analysis**: 92:8 er (IB column, 25 °C, hexane / iPrOH = 80 / 20, 0.5 mL / min,  $\lambda = 254$  nm),  $R_t$  (minor) = 18.4 min,  $R_t$  (major) = 21.1 min.

**(Z)-N-(3-(2-iodophenyl)-6-(naphthalen-1-yl)-4-oxo-3,4-dihydro-2H-1,3-thiazin-2-ylidene)benzamide (3m)**

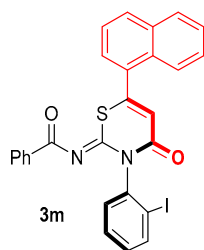

White solid, 57% yield, 32.0 mg; m.p. 185 – 187 °C;

$[\alpha]^{23}_{\text{D}} = +24.0$  ( $c = 1.0$  in  $\text{CHCl}_3$ );

**$^1\text{H NMR}$**  (400 MHz,  $\text{CDCl}_3$ )  $\delta$  8.14 – 8.12 (m, 1H), 8.07 (dd,  $J = 8.0, 1.4$  Hz, 1H), 7.99 (d,  $J = 8.2$  Hz, 1H), 7.95 – 7.93 (m, 1H), 7.78 – 7.76 (m, 2H), 7.66 – 7.54 (m, 5H), 7.48 – 7.41 (m, 2H), 7.32 (t,  $J = 7.8$  Hz, 2H), 7.23 (dd,  $J = 7.8, 1.6$  Hz, 1H), 6.87 (s, 1H).

**$^{13}\text{C NMR}$**  (101 MHz,  $\text{CDCl}_3$ )  $\delta$  175.6, 161.5, 161.3, 151.8, 141.5, 139.9, 135.0, 133.8, 133.1, 132.0, 131.3, 130.1 (2C), 130.0, 129.7, 129.2, 128.8, 128.3, 127.7, 127.0, 126.9, 125.1, 124.5, 120.2, 98.1.

**HRMS** (ESI-TOF)  $m/z$ :  $[\text{M}+\text{Na}]^+$  Calcd for  $\text{C}_{27}\text{H}_{17}\text{IN}_2\text{O}_2\text{SNa}$  582.9948; Found 582.9943.

**HPLC analysis**: 97:3 er (ODH column, 25 °C, hexane / iPrOH = 80 / 20, 0.5 mL / min,  $\lambda = 254$  nm),  $R_t$  (major) = 35.4 min,  $R_t$  (minor) = 38.5 min.

**(Z)-N-(3-(2-iodophenyl)-4-oxo-6-(thiophen-2-yl)-3,4-dihydro-2H-1,3-thiazin-2-ylidene)benzamide (3n)**

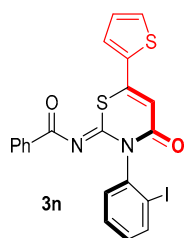

White solid, 80% yield, 41.8 mg; m.p. 144 – 146 °C;

$[\alpha]^{22}_D = +7.6$  ( $c = 1.0$  in  $\text{CHCl}_3$ );

**$^1\text{H NMR}$**  (400 MHz,  $\text{CDCl}_3$ )  $\delta$  8.03 (dd,  $J = 8.0, 1.4$  Hz, 1H), 7.81 – 7.78 (m, 2H), 7.64 (dd,  $J = 3.8, 1.2$  Hz, 1H), 7.60 – 7.53 (m, 2H), 7.50 – 7.46 (m, 1H), 7.35 – 7.31 (m, 3H), 7.23 – 7.18 (m, 2H), 6.93 (s, 1H).

**$^{13}\text{C NMR}$**  (101 MHz,  $\text{CDCl}_3$ )  $\delta$  175.6, 161.6, 160.0, 144.1, 141.5, 139.8, 136.9, 134.9, 133.1, 130.6, 130.13, 130.10, 129.6, 129.1, 128.9, 128.3, 113.2, 98.0.

**HRMS** (ESI-TOF)  $m/z$ :  $[\text{M}+\text{Na}]^+$  Calcd for  $\text{C}_{21}\text{H}_{13}\text{IN}_2\text{O}_2\text{S}_2\text{Na}$  538.9355; Found 538.9376.

**HPLC analysis**: 99:1 er (ODH column, 25 °C, hexane / iPrOH = 80 / 20, 0.5 mL / min,  $\lambda = 254$  nm),  $R_t$  (minor) = 40.9 min,  $R_t$  (major) = 46.7 min.

**(Z)-N-(3-(2-iodophenyl)-4-oxo-6-phenyl-3,4-dihydro-2H-1,3-thiazin-2-ylidene)-4-methylbenzamide (4a)**

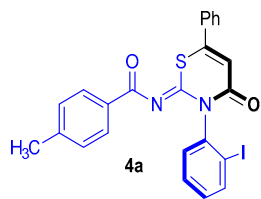

Yellow solid, 45% yield, 23.4 mg; m.p. 156 – 158 °C;

$[\alpha]^{23}_D = +16.1$  ( $c = 1.0$  in  $\text{CHCl}_3$ );

**$^1\text{H NMR}$**  (400 MHz,  $\text{CDCl}_3$ )  $\delta$  8.03 (dd,  $J = 8.0, 1.4$  Hz, 1H), 7.71 – 7.68 (m, 4H), 7.57 – 7.49 (m, 4H), 7.33 (dd,  $J = 8.0, 1.6$  Hz, 1H), 7.20 (td,  $J = 7.8, 1.6$  Hz, 1H), 7.13 (d,  $J = 8.0$  Hz, 2H), 6.92 (s, 1H), 2.36 (s, 3H).

**$^{13}\text{C NMR}$**  (101 MHz,  $\text{CDCl}_3$ )  $\delta$  175.6, 161.9, 159.9, 151.7, 144.0, 141.4, 139.8, 134.4, 132.4, 131.8, 130.2, 130.1, 129.7, 129.4, 129.1, 126.8, 115.7, 98.1, 21.8.

**HRMS** (ESI-TOF)  $m/z$ :  $[\text{M}+\text{Na}]^+$  Calcd for  $\text{C}_{24}\text{H}_{17}\text{IN}_2\text{O}_2\text{SNa}$  546.9948; Found 546.9949.

**UPLC analysis**: 93:7 er (OD-3 column, 25 °C, hexane / iPrOH = 80 / 20, 0.5 mL / min,  $\lambda = 254$  nm),  $R_t$  (major) = 24.1 min,  $R_t$  (minor) = 32.6 min.

**(Z)-N-(3-(2-iodophenyl)-4-oxo-6-phenyl-3,4-dihydro-2H-1,3-thiazin-2-ylidene)-3-methylbenzamide (4b)**

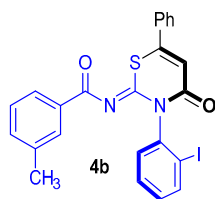

White solid, 41% yield, 21.7 mg; m.p. 128 – 130 °C;

$[\alpha]^{22}_D = +17.5$  ( $c = 1.0$  in  $\text{CHCl}_3$ );

**$^1\text{H NMR}$**  (400 MHz,  $\text{CDCl}_3$ )  $\delta$  8.04 (dd,  $J = 8.0, 1.4$  Hz, 1H), 7.71 – 7.69 (m,

2H), 7.62 – 7.49 (m, 6H), 7.35 (dd,  $J = 8.0, 1.4$  Hz, 1H), 7.30 – 7.28 (m, 1H), 7.24 – 7.19 (m, 2H), 6.93 (s, 1H), 2.30 (s, 3H).

**$^{13}\text{C}$  NMR** (101 MHz,  $\text{CDCl}_3$ )  $\delta$  175.7, 161.8, 159.7, 151.5, 141.5, 139.8, 138.0, 134.9, 134.4, 133.9, 131.8, 130.9, 130.0, 129.7, 129.4, 129.2, 129.1, 128.2, 127.2, 126.8, 115.7, 98.1, 21.3.

**HRMS** (ESI-TOF)  $m/z$ :  $[\text{M}+\text{Na}]^+$  Calcd for  $\text{C}_{24}\text{H}_{17}\text{IN}_2\text{O}_2\text{SNa}$  546.9948; Found 546.9941.

**UPLC analysis**: 90:10 er (AD-3 column, 25 °C, hexane / iPrOH = 80 / 20, 0.5 mL / min,  $\lambda = 254$  nm),  $R_t$  (major) = 32.5 min,  $R_t$  (minor) = 36.2 min.

**(Z)-N-(3-(2-iodophenyl)-4-oxo-6-phenyl-3,4-dihydro-2H-1,3-thiazin-2-ylidene)-3-methoxybenzamide (4c)**

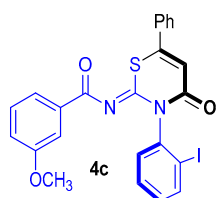

White solid, 49% yield, 26.6 mg; m.p. 131 – 133 °C;

$[\alpha]_{\text{D}}^{23} = +14.3$  ( $c = 1.0$  in  $\text{CHCl}_3$ );

**$^1\text{H}$  NMR** (400 MHz,  $\text{CDCl}_3$ )  $\delta$  8.03 (dd,  $J = 8.0, 1.4$  Hz, 1H), 7.73 – 7.70 (m, 2H), 7.59 – 7.50 (m, 4H), 7.45 (dt,  $J = 7.6, 1.2$  Hz, 1H), 7.35 (dd,  $J = 8.0, 1.6$

Hz, 1H), 7.29 – 7.28 (m, 1H), 7.24 – 7.18 (m, 2H), 7.04 – 7.01 (m, 1H), 6.94 (s, 1H), 3.70 (s, 3H).

**$^{13}\text{C}$  NMR** (101 MHz,  $\text{CDCl}_3$ )  $\delta$  175.4, 161.8, 160.8, 159.4, 151.7, 141.6, 139.8, 136.4, 134.3, 131.9, 130.0, 129.7, 129.5, 129.4, 129.1, 126.8, 122.6, 120.7, 115.8, 113.4, 98.1, 55.3.

**HRMS** (ESI-TOF)  $m/z$ :  $[\text{M}+\text{Na}]^+$  Calcd for  $\text{C}_{24}\text{H}_{17}\text{IN}_2\text{O}_3\text{SNa}$  562.9897; Found 562.9893.

**UPLC analysis**: 90:10 er (AD-3 column, 25 °C, hexane / iPrOH = 80 / 20, 0.5 mL / min,  $\lambda = 254$  nm),  $R_t$  (minor) = 34.3 min,  $R_t$  (major) = 43.5 min.

**(Z)-N-(3-(2-iodophenyl)-4-oxo-6-phenyl-3,4-dihydro-2H-1,3-thiazin-2-ylidene)-2-methylbenzamide (4d)**

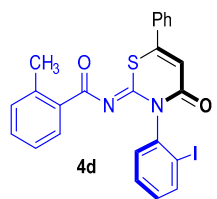

Light yellow solid, 42% yield, 22.1 mg; m.p. 139 – 141 °C;

$[\alpha]_{\text{D}}^{23} = +10.7$  ( $c = 1.0$  in  $\text{CHCl}_3$ );

**$^1\text{H}$  NMR** (400 MHz,  $\text{CDCl}_3$ )  $\delta$  8.01 (dd,  $J = 8.0, 1.4$  Hz, 1H), 7.72 – 7.69 (m, 2H), 7.62 (dd,  $J = 8.0, 1.5$  Hz, 1H), 7.58 – 7.49 (m, 4H), 7.34 – 7.30 (m, 2H),

7.20 – 7.15 (m, 2H), 7.09 (td,  $J = 7.6, 1.4$  Hz, 1H), 6.92 (s, 1H), 2.50 (s, 3H).

**$^{13}\text{C}$  NMR** (101 MHz,  $\text{CDCl}_3$ )  $\delta$  177.2, 161.9, 159.5, 151.7, 141.5, 141.2, 139.9, 134.5, 133.7, 132.3,

132.2, 131.9, 131.8, 130.1, 129.7, 129.4, 129.1, 126.9, 125.6, 115.8, 98.2, 22.3.

**HRMS** (ESI-TOF)  $m/z$ :  $[M+Na]^+$  Calcd for  $C_{24}H_{17}IN_2O_2SNa$  546.9948; Found 546.9937.

**UPLC analysis**: 87:13 er (AD-3 column, 25 °C, hexane / iPrOH = 80 / 20, 0.5 mL / min,  $\lambda$  = 254 nm),  $R_t$  (minor) = 17.4 min,  $R_t$  (major) = 25.5 min.

**(Z)-4-fluoro-N-(3-(2-iodophenyl)-4-oxo-6-phenyl-3,4-dihydro-2H-1,3-thiazin-2-ylidene)benzamide (4e)**

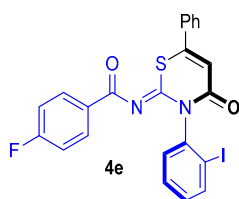

Yellow solid, 49% yield, 26.1 mg; m.p. 147 – 149 °C;

$[\alpha]_D^{23} = +17.0$  ( $c = 1.0$  in  $CHCl_3$ );

**$^1H$  NMR** (400 MHz,  $CDCl_3$ )  $\delta$  8.04 (dd,  $J = 8.0, 1.4$  Hz, 1H), 7.82 – 7.77 (m, 2H), 7.72 – 7.69 (m, 2H), 7.59 – 7.50 (m, 4H), 7.33 (dd,  $J = 8.0, 1.6$  Hz, 1H),

7.22 (td,  $J = 7.8, 1.6$  Hz, 1H), 7.02 – 6.96 (m, 2H), 6.94 (s, 1H).

**$^{13}C$  NMR** (101 MHz,  $CDCl_3$ )  $\delta$  174.4, 165.9 (d,  $J = 255.4$  Hz), 161.7, 161.0, 151.6, 141.4, 139.9, 134.3, 132.7 (d,  $J = 9.5$  Hz), 131.9, 131.4 (d,  $J = 2.6$  Hz), 130.2, 129.7, 129.5, 129.0, 126.8, 115.8, 115.4 (d,  $J = 21.9$  Hz), 98.0.

**$^{19}F$  NMR** (377 MHz,  $CDCl_3$ )  $\delta$  -105.5.

**HRMS** (ESI-TOF)  $m/z$ :  $[M+Na]^+$  Calcd for  $C_{23}H_{14}FIN_2O_2SNa$  550.9697; Found 550.9694.

**UPLC analysis**: 93:7 er (OD-3 column, 25 °C, hexane / iPrOH = 80 / 20, 0.5 mL / min,  $\lambda$  = 254 nm),  $R_t$  (major) = 21.3 min,  $R_t$  (minor) = 33.9 min.

**(Z)-4-chloro-N-(3-(2-iodophenyl)-4-oxo-6-phenyl-3,4-dihydro-2H-1,3-thiazin-2-ylidene)benzamide (4f)**

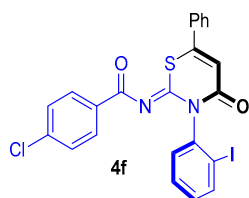

White solid, 63% yield, 34.3 mg; m.p. 160 – 163 °C;

$[\alpha]_D^{23} = +17.4$  ( $c = 1.0$  in  $CHCl_3$ );

**$^1H$  NMR** (400 MHz,  $CDCl_3$ )  $\delta$  8.03 (dd,  $J = 8.0, 1.4$  Hz, 1H), 7.72 – 7.69 (m, 4H), 7.59 – 7.50 (m, 5H), 7.34 – 7.28 (m, 3H), 7.22 (td,  $J = 7.8, 1.6$  Hz, 1H),

6.95 (s, 1H).

**$^{13}C$  NMR** (101 MHz,  $CDCl_3$ )  $\delta$  174.5, 161.6, 161.2, 151.6, 141.4, 139.9, 139.5, 134.3, 133.6, 131.9, 131.5, 130.6, 129.7, 129.5, 129.1, 128.6, 126.8, 115.9, 97.9.



**HRMS** (ESI-TOF)  $m/z$ :  $[M+Na]^+$  Calcd for  $C_{23}H_{14}ClIN_2O_2SNa$  566.9401; Found 566.9392.

**UPLC analysis**: 90:10 er (AD-3 column, 25 °C, hexane / iPrOH = 80 / 20, 0.5 mL / min,  $\lambda$  = 254 nm),  $R_t$  (major) = 36.2 min,  $R_t$  (minor) = 56.0 min.

**(Z)-4-bromo-N-(3-(2-iodophenyl)-4-oxo-6-phenyl-3,4-dihydro-2H-1,3-thiazin-2-ylidene)benzamide (4g)**

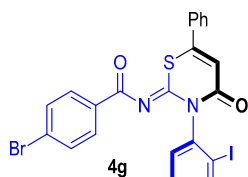

White solid, 48% yield, 28.3 mg; m.p. 166 – 168 °C;

$[\alpha]^{24}_D = +20.4$  ( $c$  = 1.0 in  $CHCl_3$ );

**$^1H$  NMR** (400 MHz,  $CDCl_3$ )  $\delta$  8.03 (dd,  $J$  = 8.0, 1.4 Hz, 1H), 7.72 – 7.69 (m, 2H), 7.64 – 7.61 (m, 2H), 7.59 – 7.49 (m, 4H), 7.48 – 7.45 (m, 2H), 7.32 (dd,  $J$  = 8.0, 1.6 Hz, 1H), 7.21 (td,  $J$  = 7.8, 1.6 Hz, 1H), 6.94 (s, 1H).

**$^{13}C$  NMR** (101 MHz,  $CDCl_3$ )  $\delta$  174.7, 161.6, 161.3, 151.6, 141.4, 139.9, 134.3, 134.0, 131.9, 131.63, 131.59, 130.2, 129.7, 129.5, 129.1, 128.3, 126.8, 115.9, 97.9.

**HRMS** (ESI-TOF)  $m/z$ :  $[M+Na]^+$  Calcd for  $C_{23}H_{14}BrIN_2O_2SNa$  610.8896; Found 610.8890.

**HPLC analysis**: 90:10 er (IA column, 25 °C, hexane / iPrOH = 80 / 20, 0.5 mL / min,  $\lambda$  = 254 nm),  $R_t$  (major) = 37.0 min,  $R_t$  (minor) = 48.5 min.

**(Z)-3-fluoro-N-(3-(2-iodophenyl)-4-oxo-6-phenyl-3,4-dihydro-2H-1,3-thiazin-2-ylidene)benzamide (4h)**

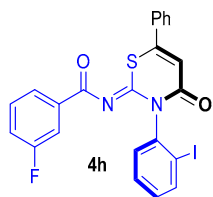

White solid, 51% yield, 26.7 mg; m.p. 132 – 134 °C;

$[\alpha]^{25}_D = +23.6$  ( $c$  = 1.0 in  $CHCl_3$ );

**$^1H$  NMR** (400 MHz,  $CDCl_3$ )  $\delta$  8.05 (dd,  $J$  = 8.0, 1.4 Hz, 1H), 7.72 – 7.69 (m, 2H), 7.60 – 7.50 (m, 5H), 7.43 – 7.39 (m, 1H), 7.34 – 7.27 (m, 2H), 7.25 – 7.14 (m, 2H), 6.95 (s, 1H).

**$^{13}C$  NMR** (101 MHz,  $CDCl_3$ )  $\delta$  174.3, 162.7 (d,  $J$  = 247.9 Hz), 161.6, 161.5, 151.6, 141.3, 139.9, 137.4 (d,  $J$  = 7.3 Hz), 134.3, 131.9, 130.2, 129.9 (d,  $J$  = 7.9 Hz), 129.7, 129.5, 129.0, 126.8, 125.7 (d,  $J$  = 2.9 Hz), 120.0 (d,  $J$  = 21.8 Hz), 116.8 (d,  $J$  = 23.1 Hz), 115.9, 97.9.

**$^{19}F$  NMR** (377 MHz,  $CDCl_3$ )  $\delta$  -112.6.

**HRMS** (ESI-TOF)  $m/z$ :  $[M+Na]^+$  Calcd for  $C_{23}H_{14}FIN_2O_2SNa$  550.9697; Found 550.9694.

**UPLC analysis:** 90:10 er (AD-3 column, 25 °C, hexane / iPrOH = 80 / 20, 0.5 mL / min,  $\lambda$  = 254 nm), Rt (minor) = 29.5 min, Rt (major) = 33.9 min.

**(Z)-3-chloro-N-(3-(2-iodophenyl)-4-oxo-6-phenyl-3,4-dihydro-2H-1,3-thiazin-2-ylidene)benzamide (4i)**

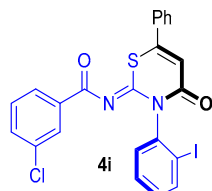

White solid, 70% yield, 38.5 mg; m.p. 124 – 126 °C;

$[\alpha]_D^{31} = +32.7$  ( $c$  = 1.0 in CHCl<sub>3</sub>);

**$^1\text{H}$  NMR** (400 MHz, CDCl<sub>3</sub>)  $\delta$  8.05 (dd,  $J$  = 7.6, 1.2 Hz, 1H), 7.71 – 7.66 (m, 4H), 7.60 – 7.49 (m, 4H), 7.44 – 7.41 (m, 1H), 7.33 (dd,  $J$  = 7.6, 1.6 Hz, 1H), 7.27 (d,  $J$  = 7.8 Hz, 1H), 7.25 – 7.21 (m, 1H), 6.95 (s, 1H).

**$^{13}\text{C}$  NMR** (101 MHz, CDCl<sub>3</sub>)  $\delta$  174.1, 161.6, 161.4, 151.5, 141.3, 139.9, 136.9, 134.4, 134.3, 132.9, 131.9, 130.4, 130.2, 129.7, 129.6, 129.5, 129.0, 128.0, 126.8, 115.9, 97.9.

**HRMS** (ESI-TOF)  $m/z$ :  $[\text{M}+\text{Na}]^+$  Calcd for C<sub>23</sub>H<sub>14</sub>ClIN<sub>2</sub>O<sub>2</sub>SNa 566.9401; Found 566.9395.

**HPLC analysis:** 88:12 er (IB column, 25 °C, hexane / iPrOH = 80 / 20, 0.5 mL / min,  $\lambda$  = 254 nm), Rt (major) = 27.6 min, Rt (minor) = 38.8 min.

**(Z)-3-bromo-N-(3-(2-iodophenyl)-4-oxo-6-phenyl-3,4-dihydro-2H-1,3-thiazin-2-ylidene)benzamide (4j)**

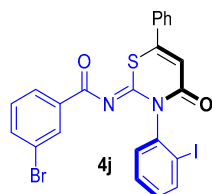

White solid, 48% yield, 28.5 mg; m.p. 126 – 128 °C;

$[\alpha]_D^{23} = +25.1$  ( $c$  = 1.0 in CHCl<sub>3</sub>);

**$^1\text{H}$  NMR** (400 MHz, CDCl<sub>3</sub>)  $\delta$  8.06 (dd,  $J$  = 8.0, 1.4 Hz, 1H), 7.85 (t,  $J$  = 1.8 Hz, 1H), 7.75 – 7.69 (m, 3H), 7.60 – 7.50 (m, 5H), 7.33 (dd,  $J$  = 7.8, 1.4 Hz, 1H), 7.24 – 7.19 (m, 2H), 6.96 (s, 1H).

**$^{13}\text{C}$  NMR** (101 MHz, CDCl<sub>3</sub>)  $\delta$  174.0, 161.6, 161.5, 151.5, 141.3, 140.0, 137.0, 135.8, 134.2, 133.4, 132.0, 130.3, 129.9, 129.8, 129.5, 129.0, 128.4, 126.8, 122.5, 116.0, 97.9.

**HRMS** (ESI-TOF)  $m/z$ :  $[\text{M}+\text{Na}]^+$  Calcd for C<sub>23</sub>H<sub>14</sub>BrIN<sub>2</sub>O<sub>2</sub>SNa 610.8896; Found 610.8890.

**UPLC analysis:** 89:11 er (AD-3 column, 25 °C, hexane / iPrOH = 80 / 20, 0.5 mL / min,  $\lambda$  = 254 nm), Rt (minor) = 31.0 min, Rt (major) = 35.4 min.

**(Z)-2-fluoro-N-(3-(2-iodophenyl)-4-oxo-6-phenyl-3,4-dihydro-2H-1,3-thiazin-2-ylidene)benzamide (4k)**

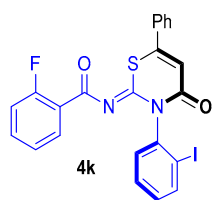

Yellow solid, 56% yield, 29.6 mg; m.p. 131 – 133 °C;

$[\alpha]_D^{40} = +8.4$  ( $c = 1.0$  in  $\text{CHCl}_3$ );

**$^1\text{H NMR}$**  (400 MHz,  $\text{CDCl}_3$ )  $\delta$  8.02 (dd,  $J = 8.0, 1.4$  Hz, 1H), 7.72 – 7.69 (m, 2H), 7.59 – 7.49 (m, 5H), 7.46 – 7.40 (m, 1H), 7.32 (dd,  $J = 8.0, 1.4$  Hz, 1H),

7.20 (td,  $J = 7.8, 1.6$  Hz, 1H), 7.08 – 7.00 (m, 2H), 6.95 (s, 1H).

**$^{13}\text{C NMR}$**  (101 MHz,  $\text{CDCl}_3$ )  $\delta$  173.2, 162.8 (d,  $J = 263.2$  Hz), 161.7, 160.9, 151.7, 141.3, 139.8, 134.7 (d,  $J = 9.4$  Hz), 134.3, 133.0, 131.9, 130.1, 129.7, 129.5, 129.1, 126.8, 123.7 (d,  $J = 4.3$  Hz), 123.2 (d,  $J = 6.9$  Hz), 117.0 (d,  $J = 22.2$  Hz), 115.8, 98.0.

**$^{19}\text{F NMR}$**  (377 MHz,  $\text{CDCl}_3$ )  $\delta$  -110.2.

**HRMS** (ESI-TOF)  $m/z$ :  $[\text{M}+\text{Na}]^+$  Calcd for  $\text{C}_{23}\text{H}_{14}\text{FIN}_2\text{O}_2\text{SNa}$  550.9697; Found 550.9692.

**UPLC analysis**: 88:12 er (AD-3 column, 25 °C, hexane / iPrOH = 80 / 20, 0.5 mL / min,  $\lambda = 254$  nm),  $R_t$  (minor) = 28.8 min,  $R_t$  (major) = 51.5 min.

**(Z)-2-chloro-N-(3-(2-iodophenyl)-4-oxo-6-phenyl-3,4-dihydro-2H-1,3-thiazin-2-ylidene)benzamide (4l)**

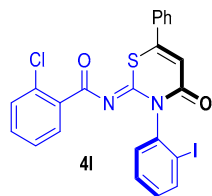

Yellow solid, 40% yield, 21.6 mg; m.p. 141 – 143 °C;

$[\alpha]_D^{28} = +7.1$  ( $c = 1.0$  in  $\text{CHCl}_3$ );

**$^1\text{H NMR}$**  (400 MHz,  $\text{CDCl}_3$ )  $\delta$  8.00 (dd,  $J = 8.0, 1.4$  Hz, 1H), 7.73 – 7.70 (m, 2H), 7.59 – 7.50 (m, 5H), 7.39 – 7.29 (m, 3H), 7.20 – 7.12 (m, 2H), 6.95 (s,

1H).

**$^{13}\text{C NMR}$**  (101 MHz,  $\text{CDCl}_3$ )  $\delta$  174.5, 161.7, 161.2, 151.7, 141.4, 139.8, 134.7, 134.3, 133.4, 133.0, 132.7, 132.0, 131.4, 130.1, 129.6, 129.5, 129.1, 126.9, 126.4, 115.9, 98.0.

**HRMS** (ESI-TOF)  $m/z$ :  $[\text{M}+\text{Na}]^+$  Calcd for  $\text{C}_{23}\text{H}_{14}\text{ClIN}_2\text{O}_2\text{SNa}$  566.9401; Found 566.9392.

**HPLC analysis**: 84:16 er (IB column, 25 °C, hexane / iPrOH = 80 / 20, 0.5 mL / min,  $\lambda = 254$  nm),  $R_t$  (minor) = 28.2 min,  $R_t$  (major) = 31.9 min.

**(Z)-2-bromo-N-(3-(2-iodophenyl)-4-oxo-6-phenyl-3,4-dihydro-2H-1,3-thiazin-2-**

**ylidene)benzamide (4m)**

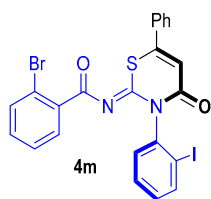

Yellow solid, 37% yield, 21.7 mg; m.p. 138 – 140 °C;

$[\alpha]_D^{23} = +10.2$  ( $c = 1.0$  in  $\text{CHCl}_3$ );

**$^1\text{H NMR}$**  (400 MHz,  $\text{CDCl}_3$ )  $\delta$  8.00 (dd,  $J = 8.0, 1.4$  Hz, 1H), 7.73 – 7.70 (m, 2H), 7.61 – 7.50 (m, 6H), 7.31 (dd,  $J = 8.0, 1.6$  Hz, 1H), 7.25 – 7.15 (m, 3H),

6.95 (s, 1H).

**$^{13}\text{C NMR}$**  (101 MHz,  $\text{CDCl}_3$ )  $\delta$  174.9, 161.7, 161.3, 151.7, 141.3, 139.8, 135.1, 134.8, 134.3, 133.1, 132.7, 131.9, 130.1, 129.7, 129.5, 129.2, 127.0, 126.9, 122.7, 115.9, 98.0.

**HRMS** (ESI-TOF)  $m/z$ :  $[\text{M}+\text{Na}]^+$  Calcd for  $\text{C}_{23}\text{H}_{14}\text{BrIN}_2\text{O}_2\text{SNa}$  610.8896; Found 610.8890.

**UPLC analysis:** 85:15 v/v (AD-3 column, 25 °C, hexane / iPrOH = 80 / 20, 0.5 mL / min,  $\lambda = 254$  nm),  $R_t$  (minor) = 25.2 min,  $R_t$  (major) = 47.3 min.

## IX. $^1\text{H}$ NMR, $^{13}\text{C}$ NMR, $^{19}\text{F}$ NMR and HPLC spectra

### *N*-((2-iodophenyl)carbamothioyl)benzamide (2a)

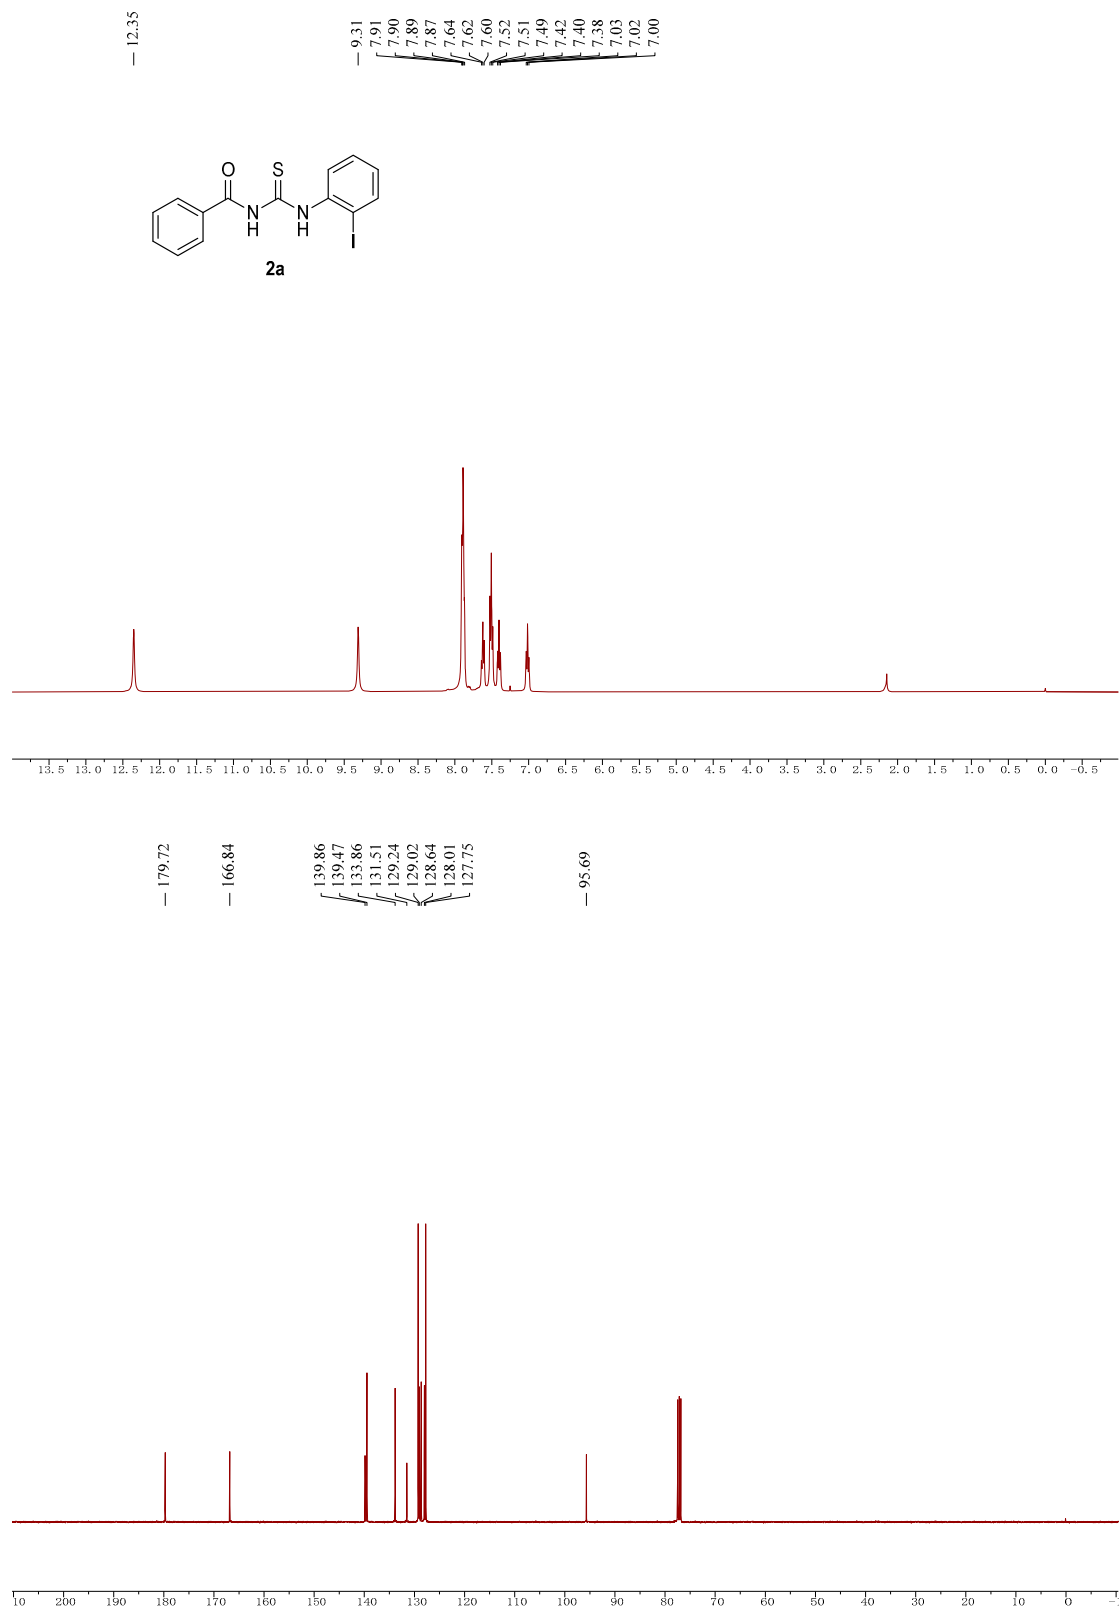

***N*-((2-iodophenyl)carbamothioyl)-4-methylbenzamide (2b)**

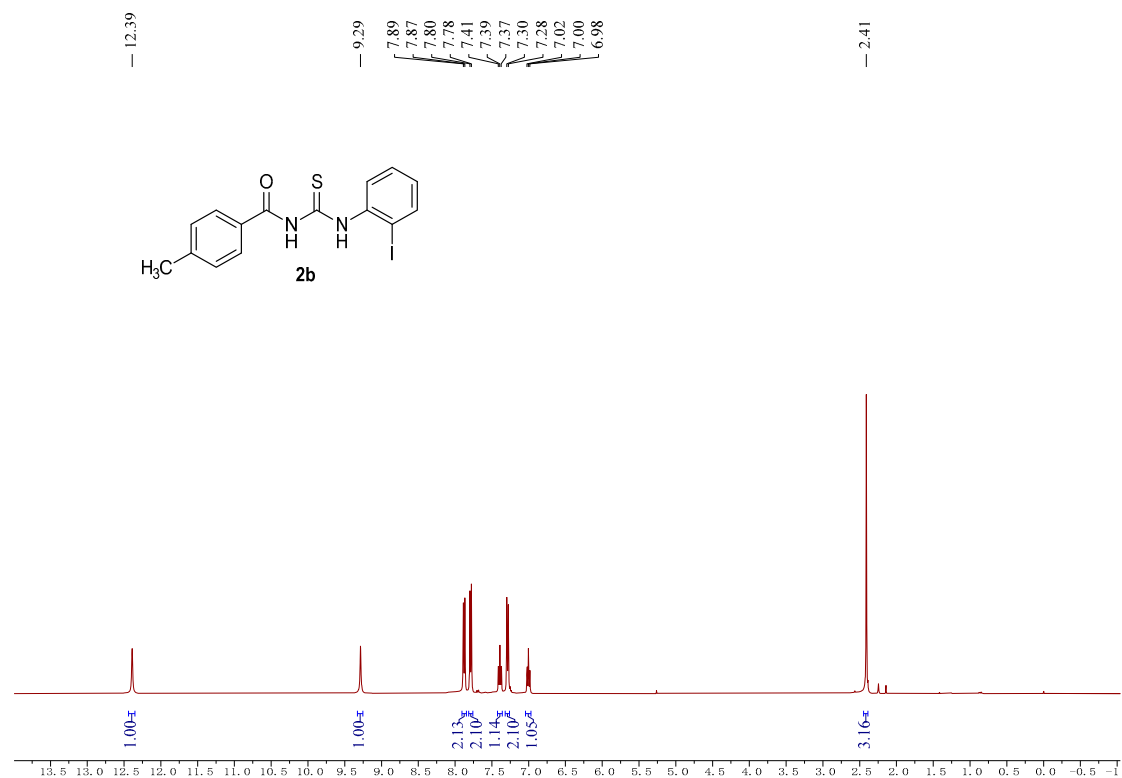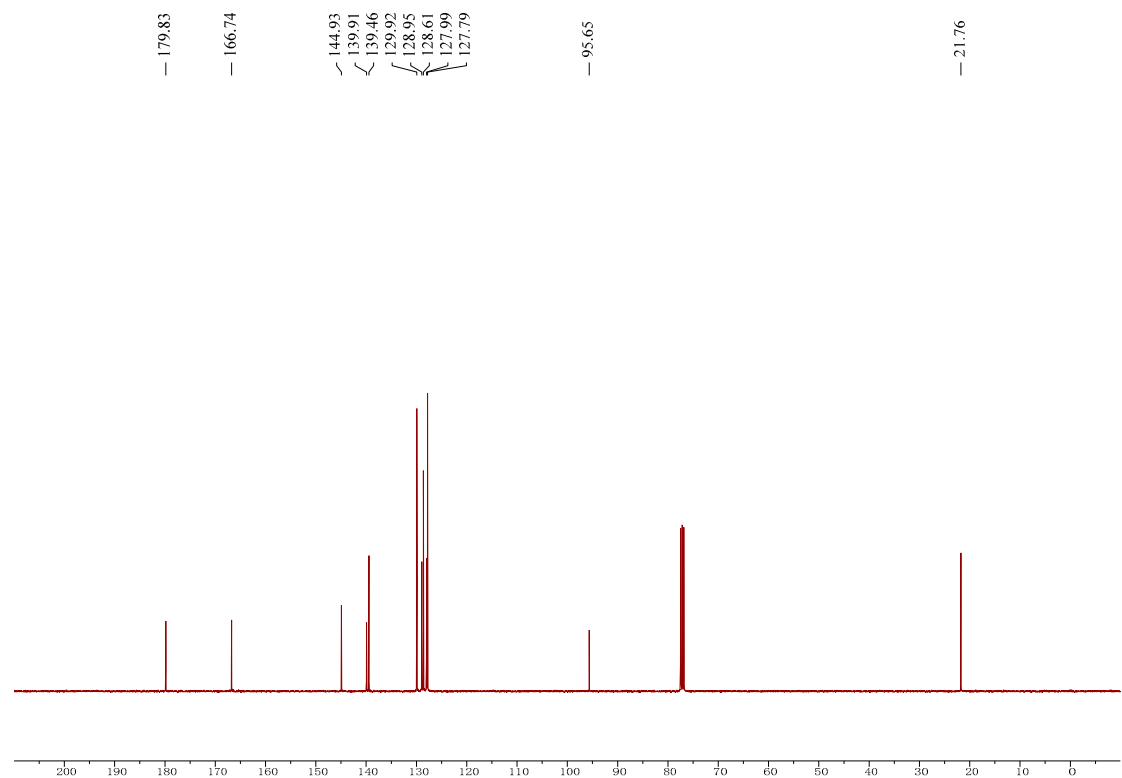

***N*-((2-iodophenyl)carbamothioyl)-3-methylbenzamide (2c)**

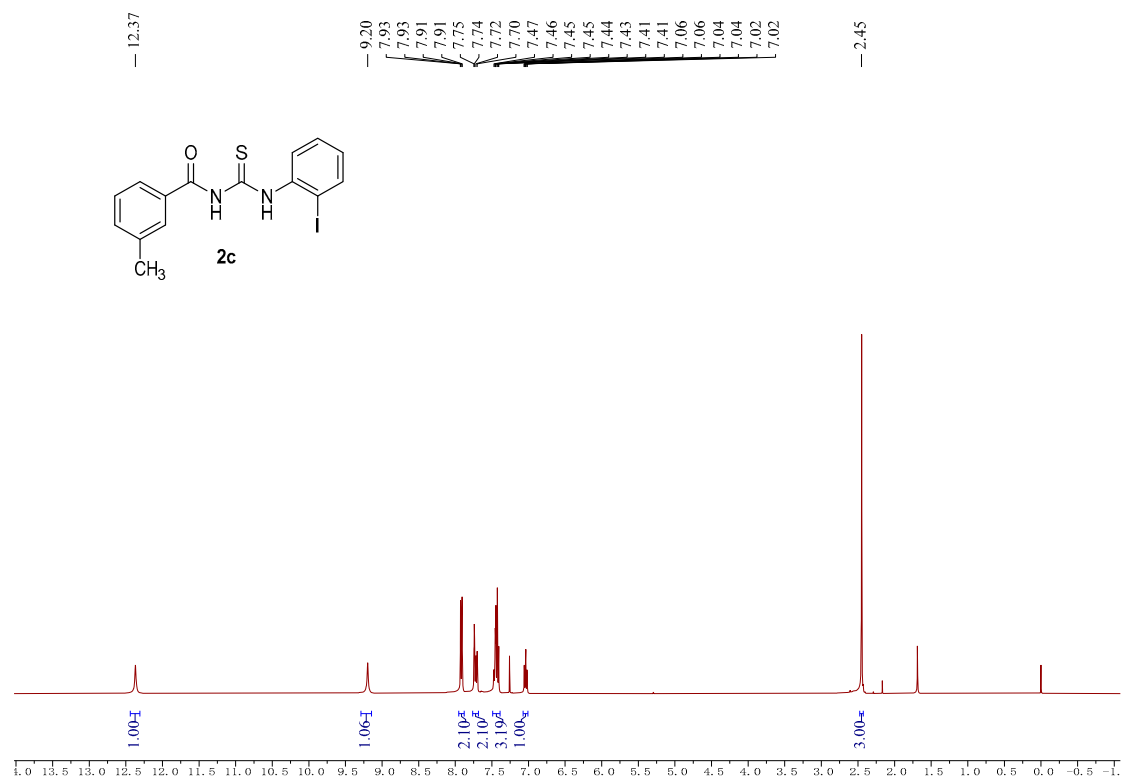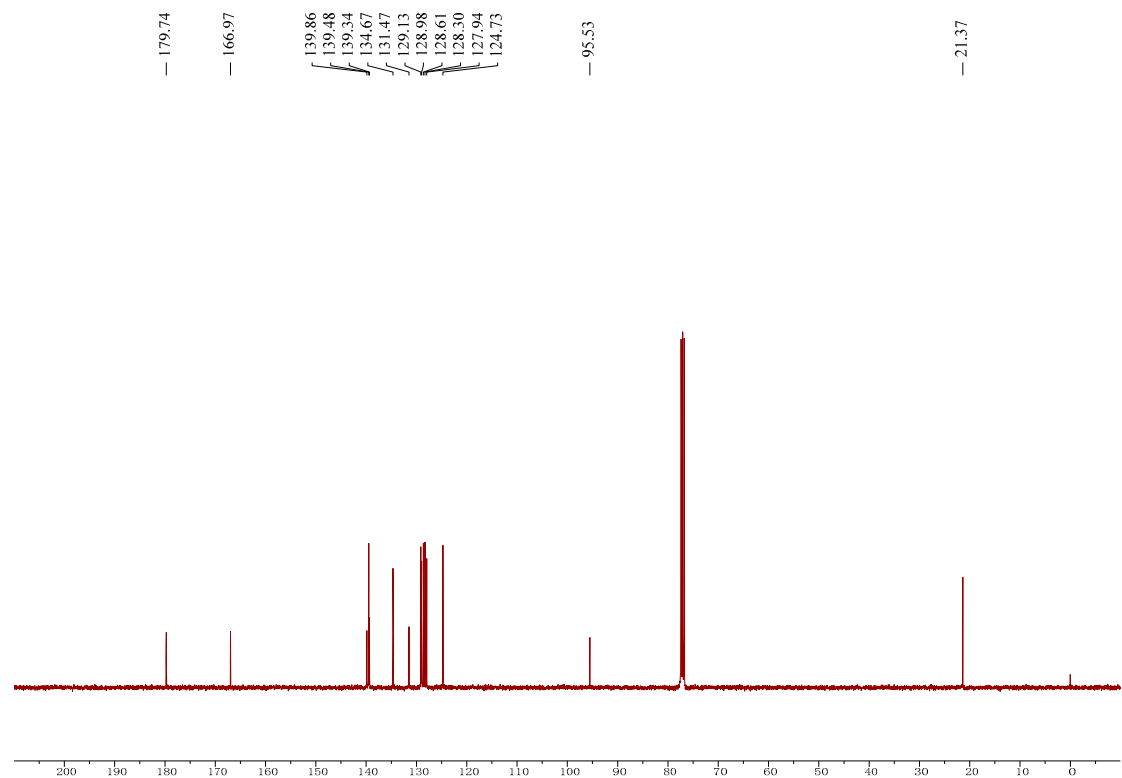

***N*-((2-iodophenyl)carbamothioyl)-3-methoxybenzamide (2d)**

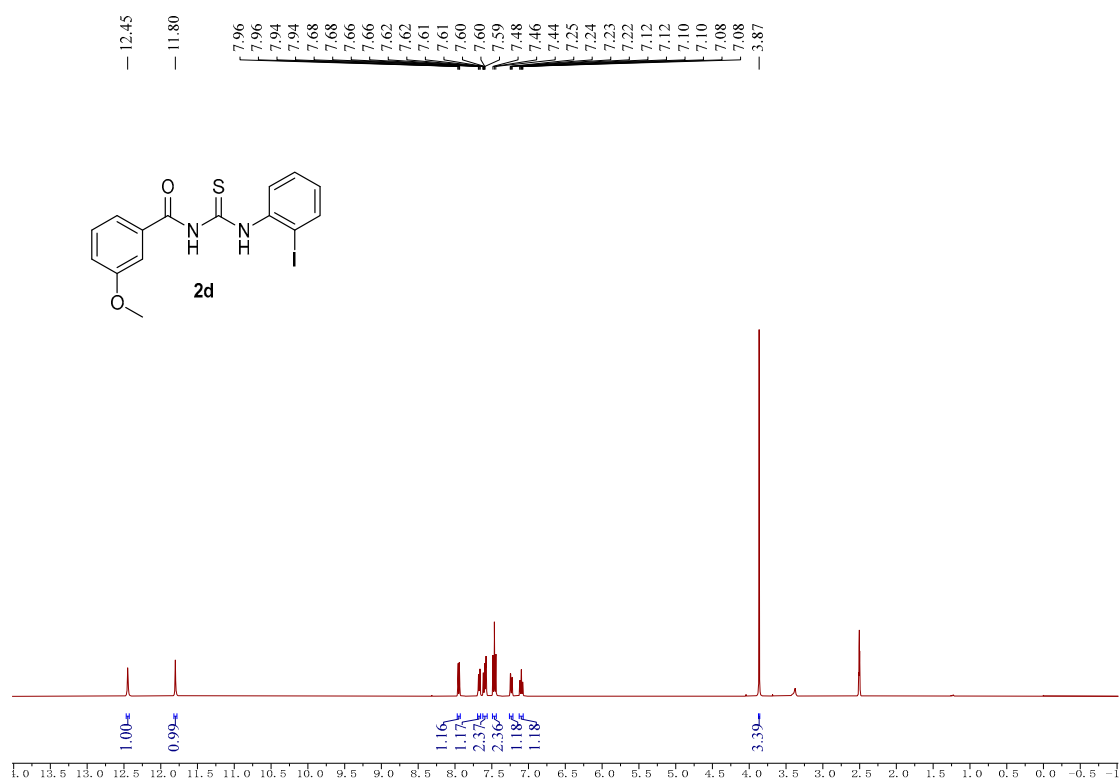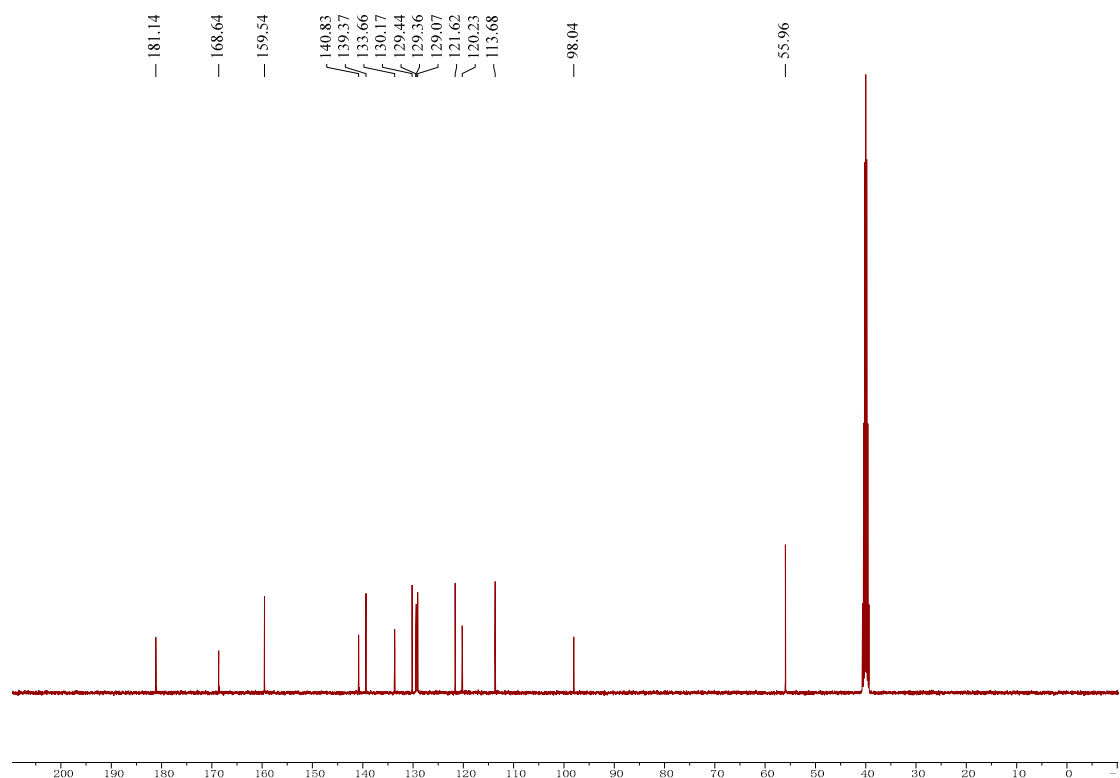



***N*-((2-iodophenyl)carbamothioyl)-2-methylbenzamide (2e)**

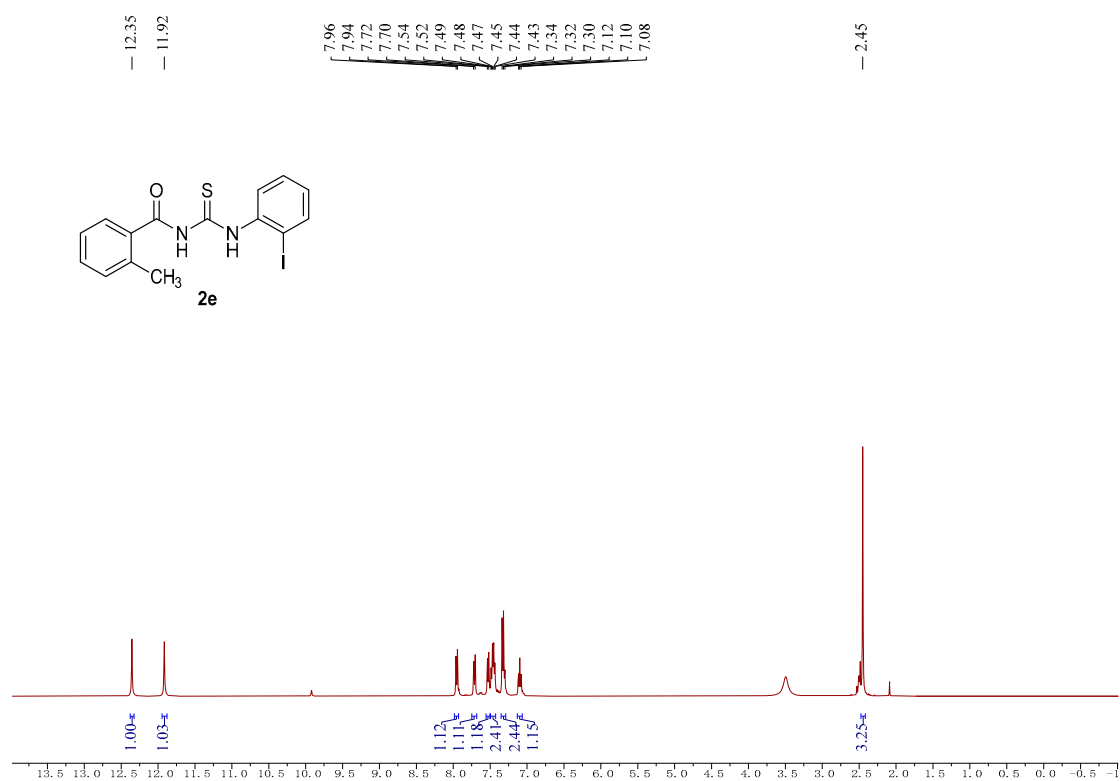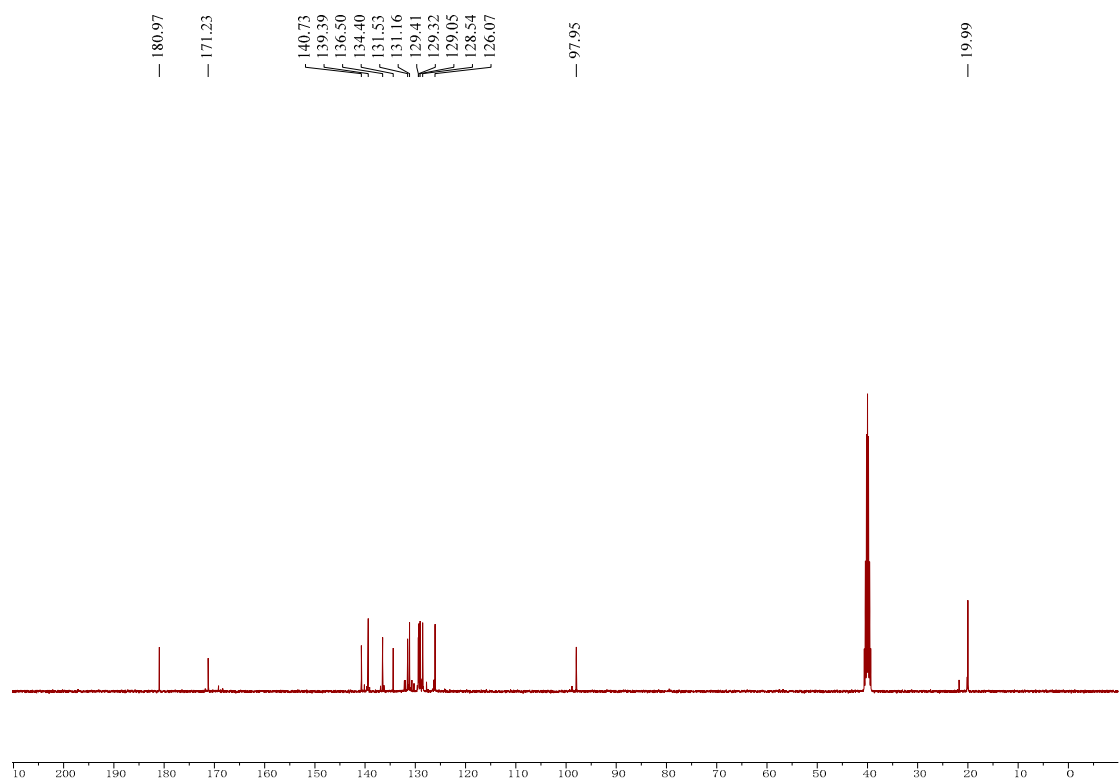

**4-fluoro-N-((2-iodophenyl)carbamothioyl)benzamide (2f)**

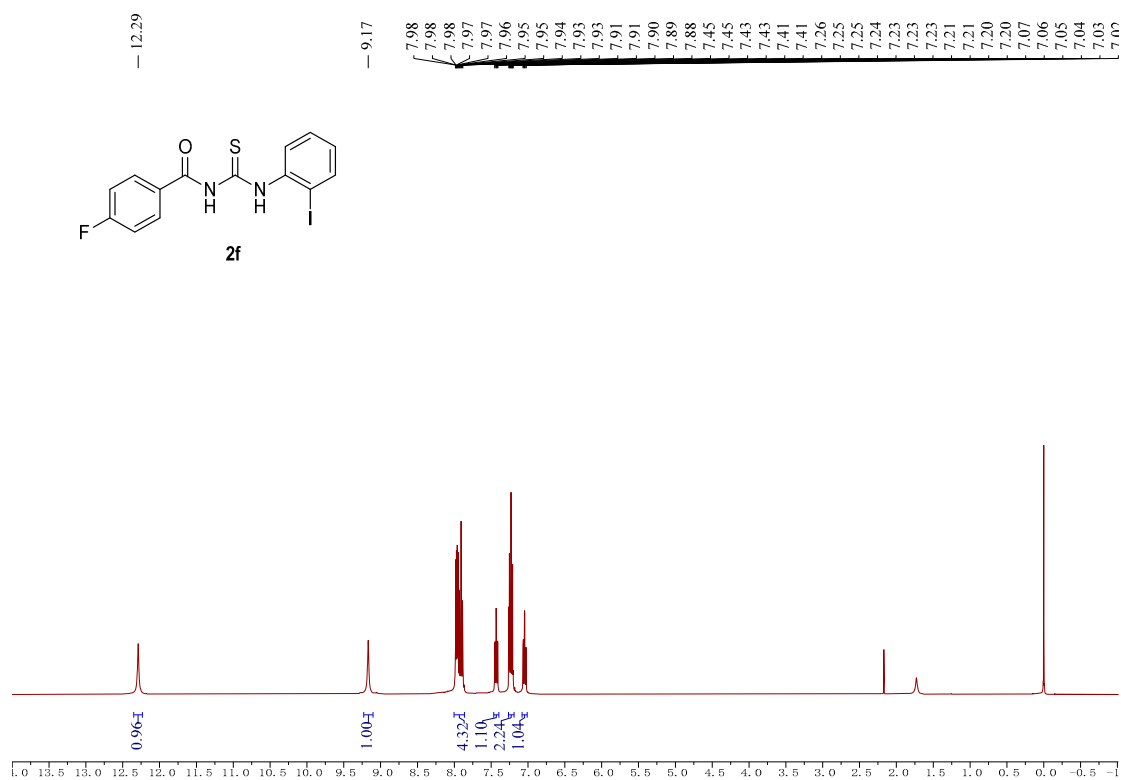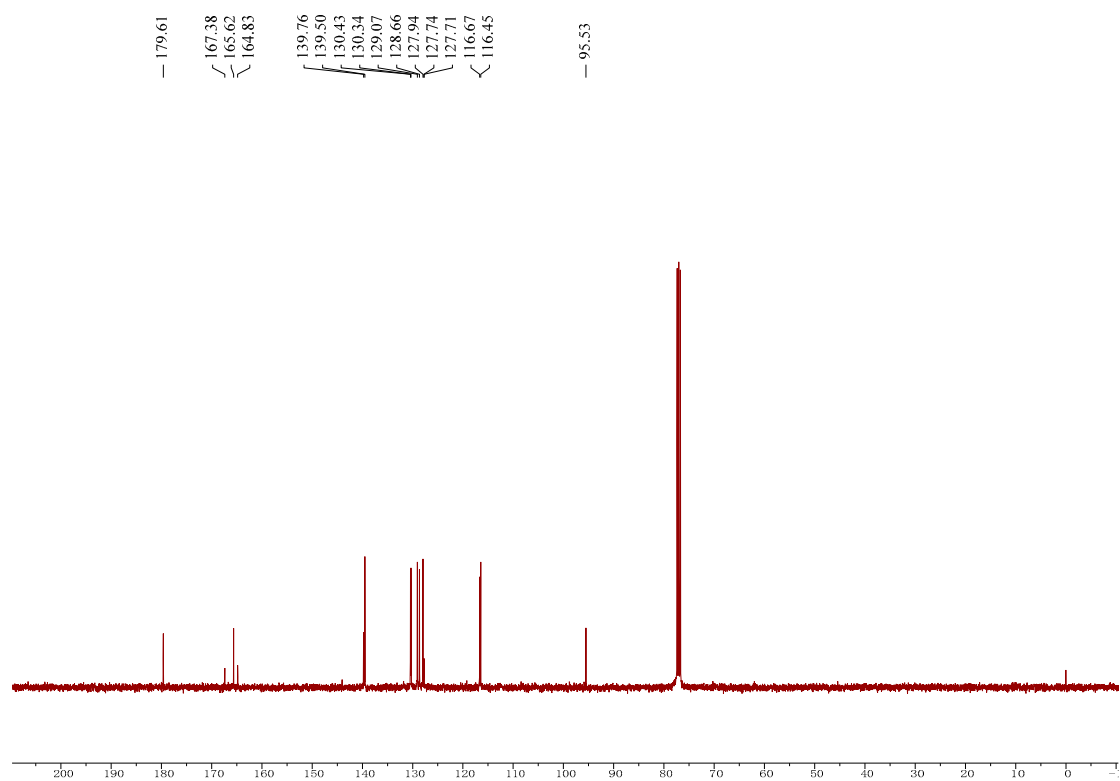

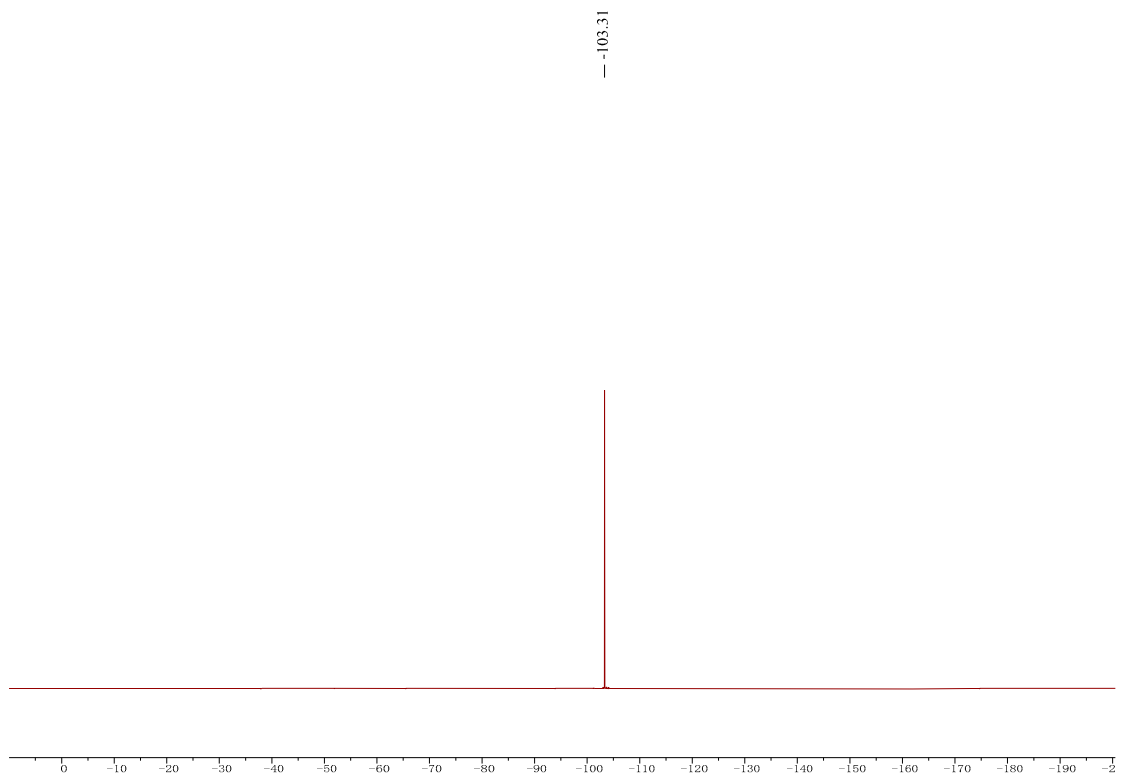

**4-chloro-N-((2-iodophenyl)carbamothioyl)benzamide (2g)**

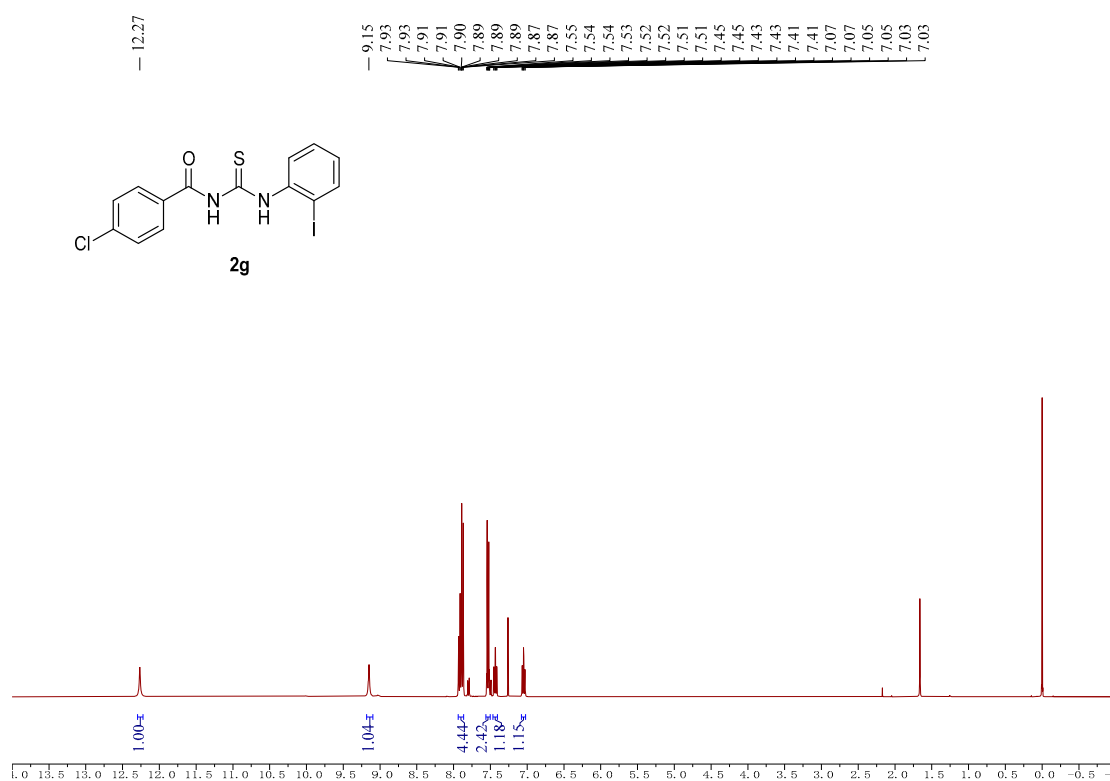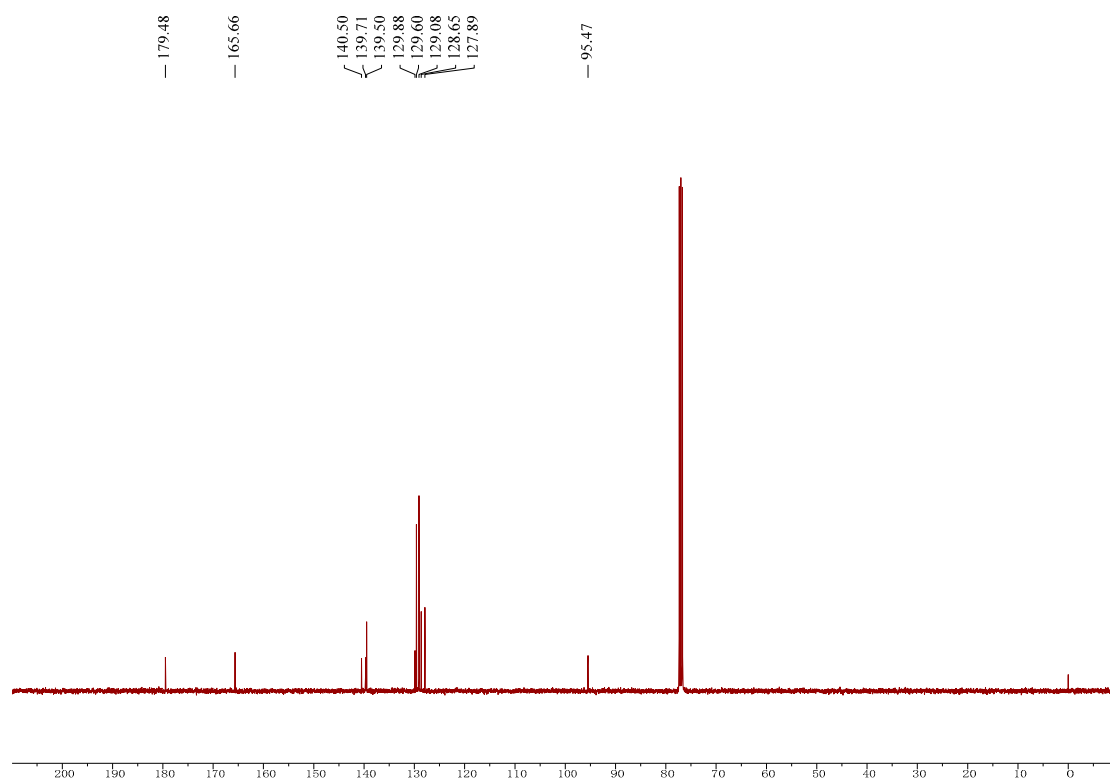

**4-bromo-N-((2-iodophenyl)carbamothioyl)benzamide (2h)**

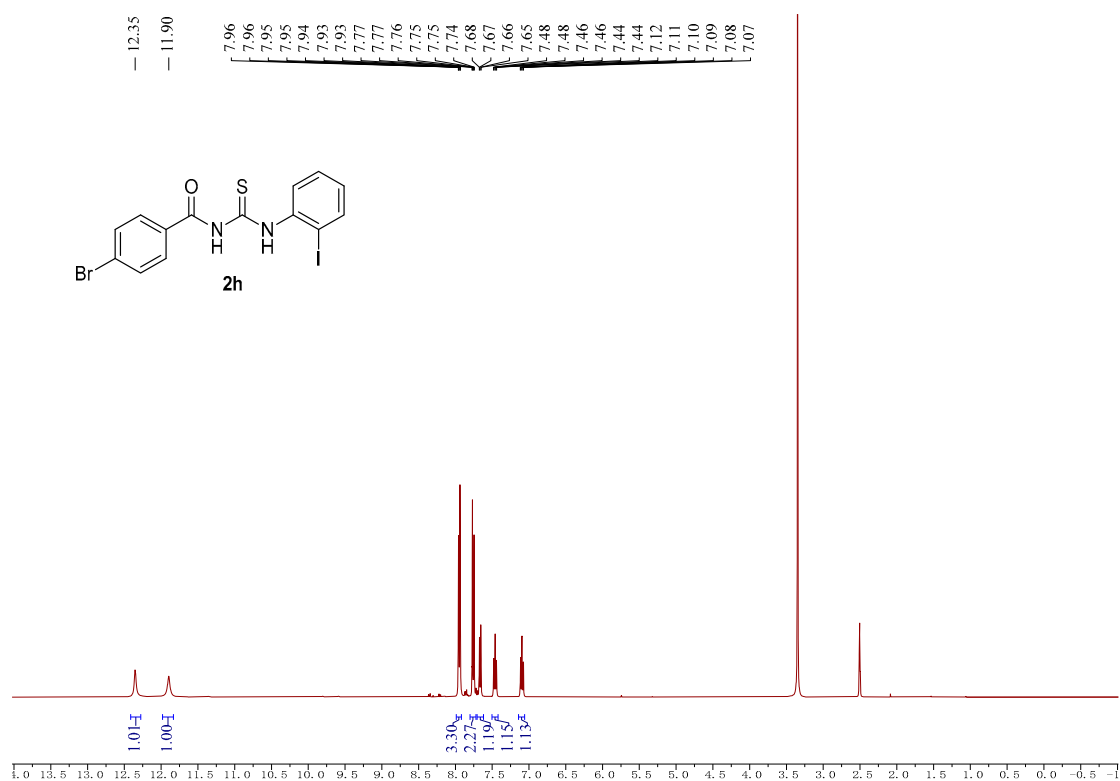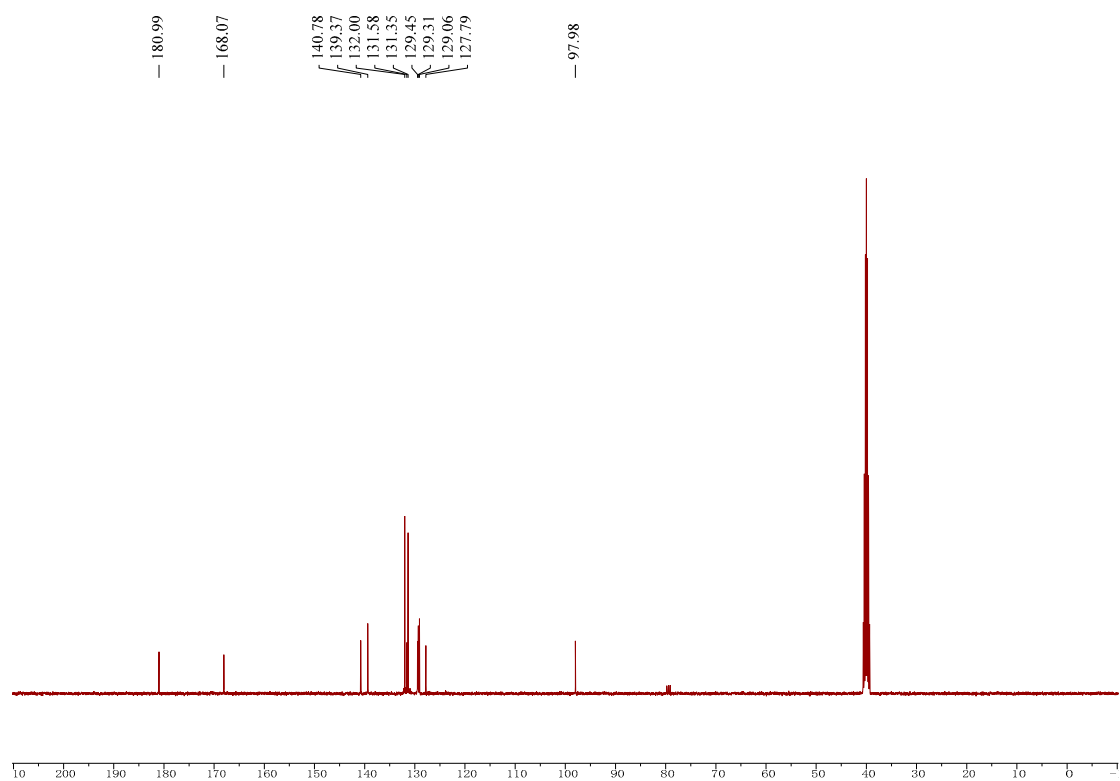

**3-fluoro-N-((2-iodophenyl)carbamothioyl)benzamide (2i)**

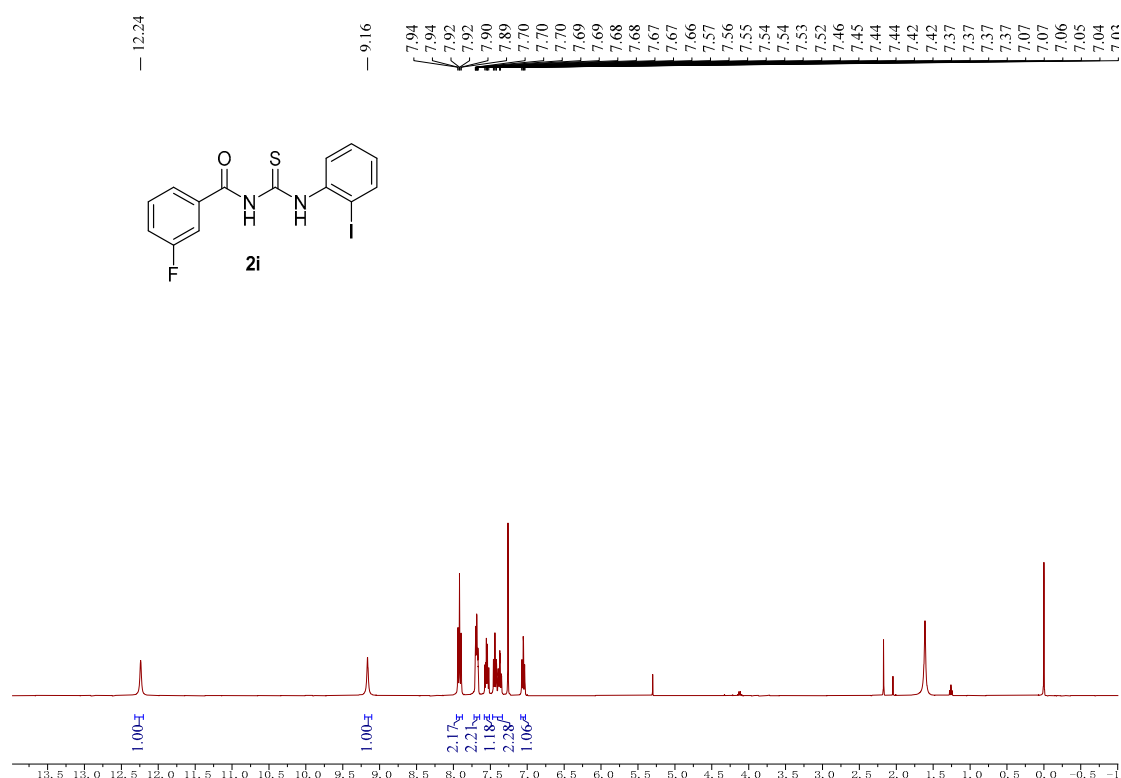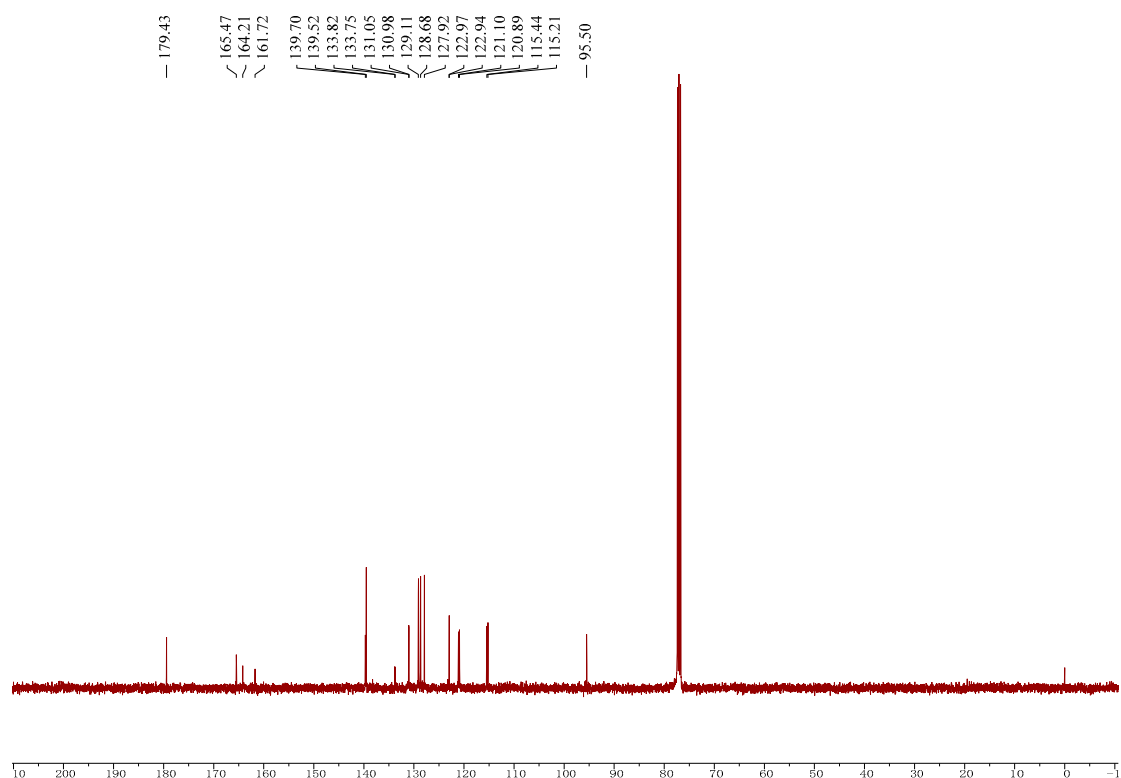

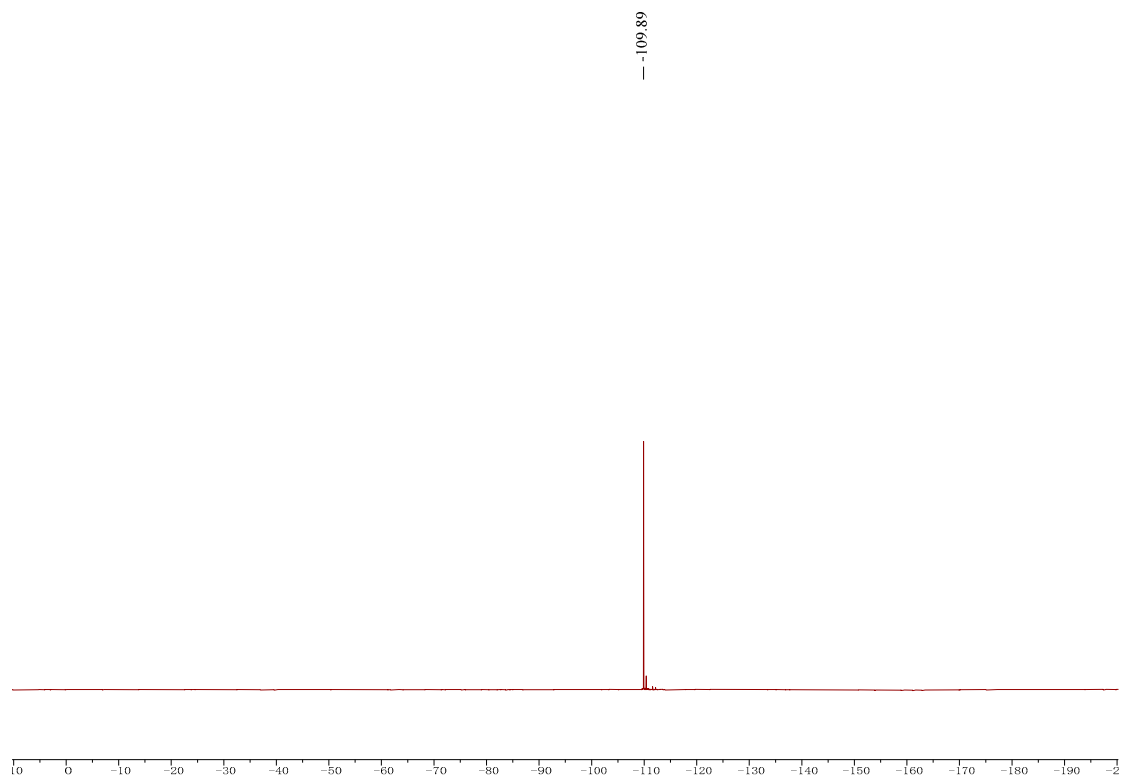

**3-chloro-N-((2-iodophenyl)carbamothioyl)benzamide (2j)**

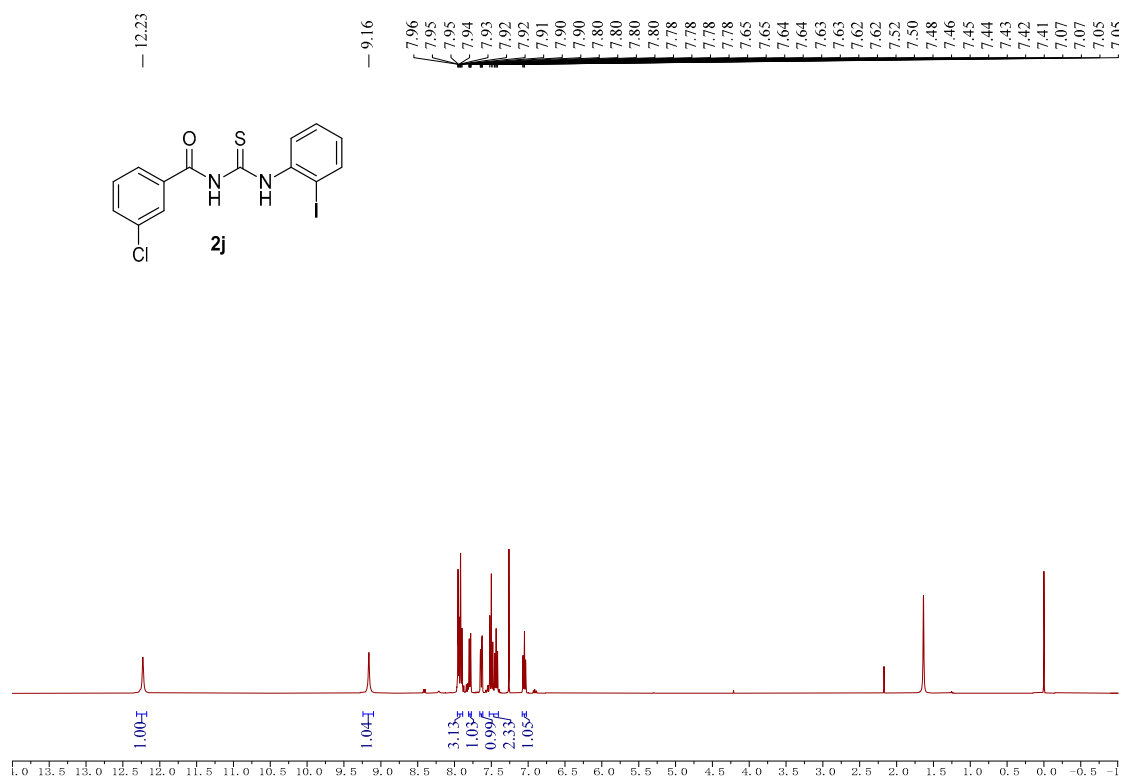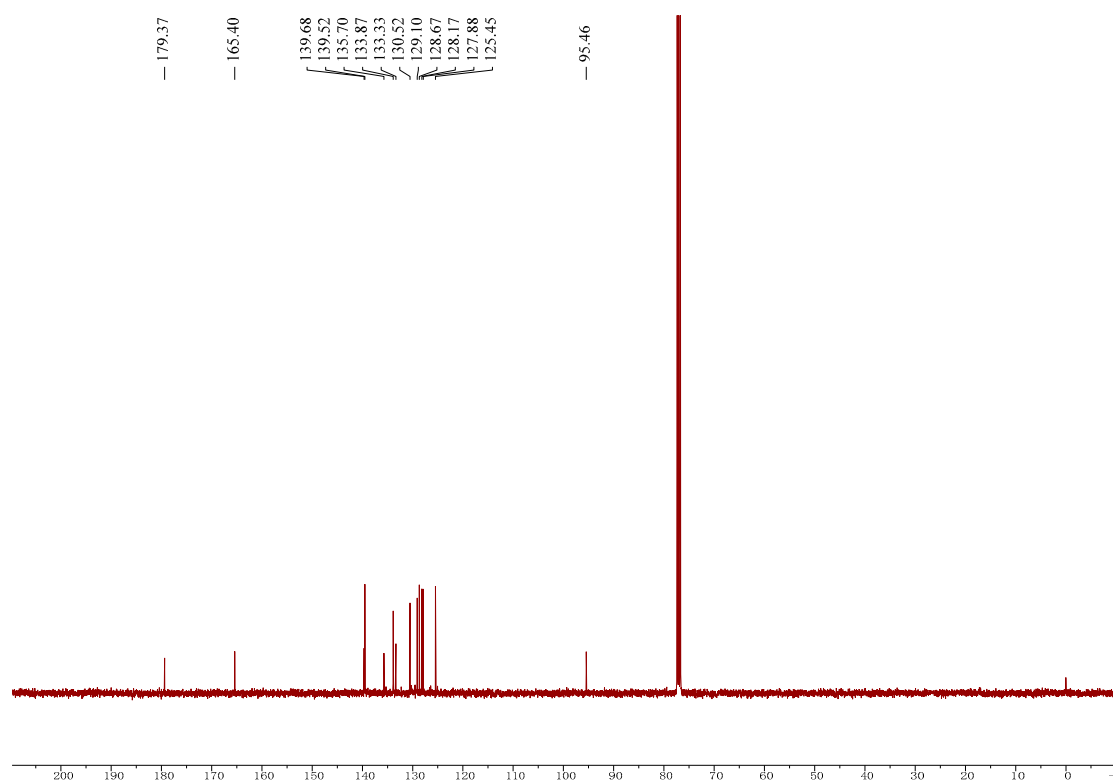



**3-bromo-N-((2-iodophenyl)carbamothioyl)benzamide (2k)**

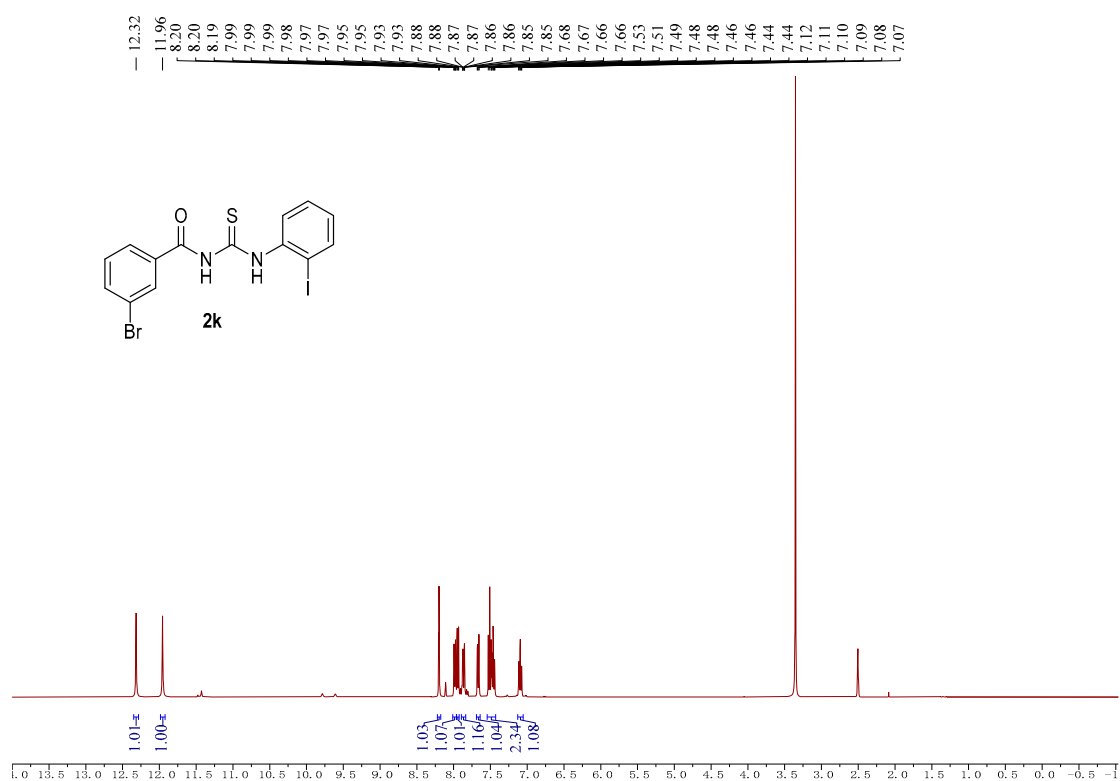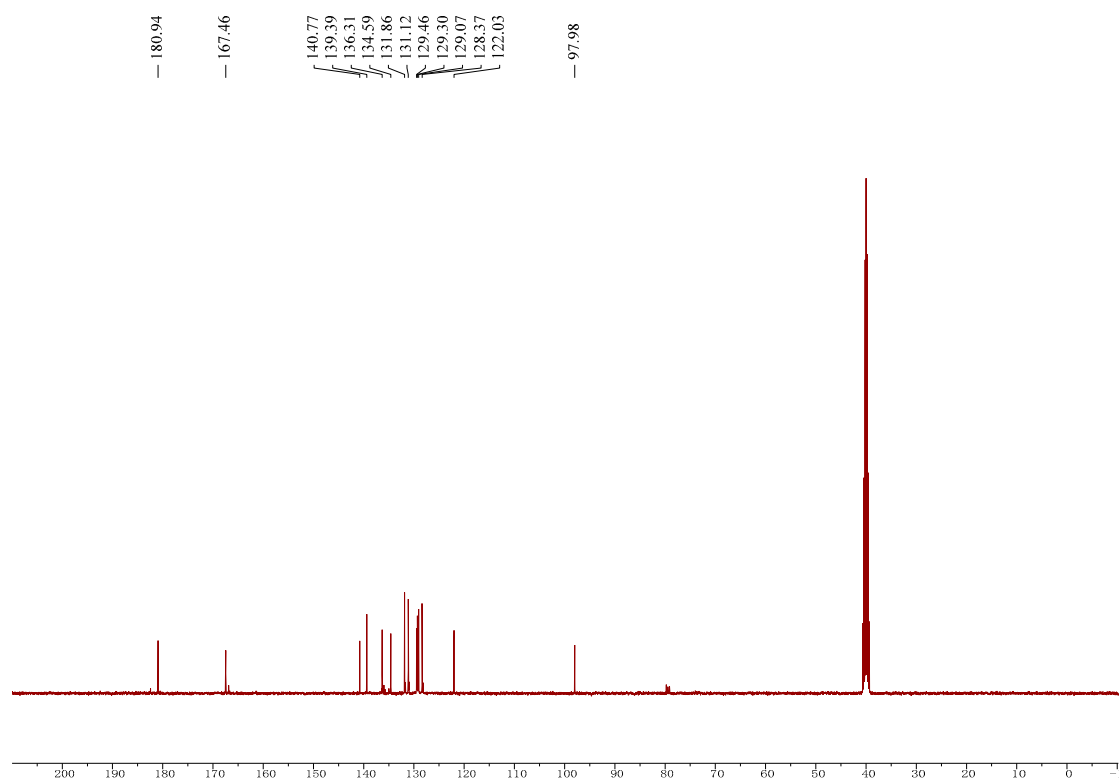

**2-fluoro-N-((2-iodophenyl)carbamothioyl)benzamide (2l)**

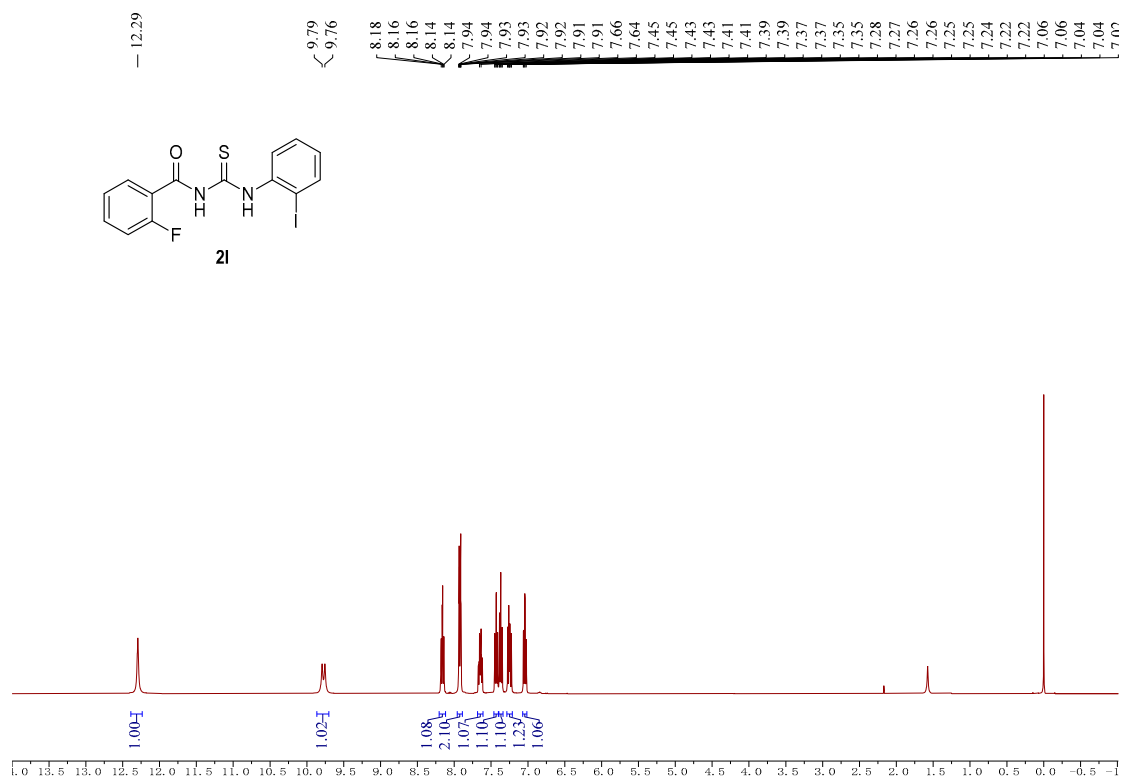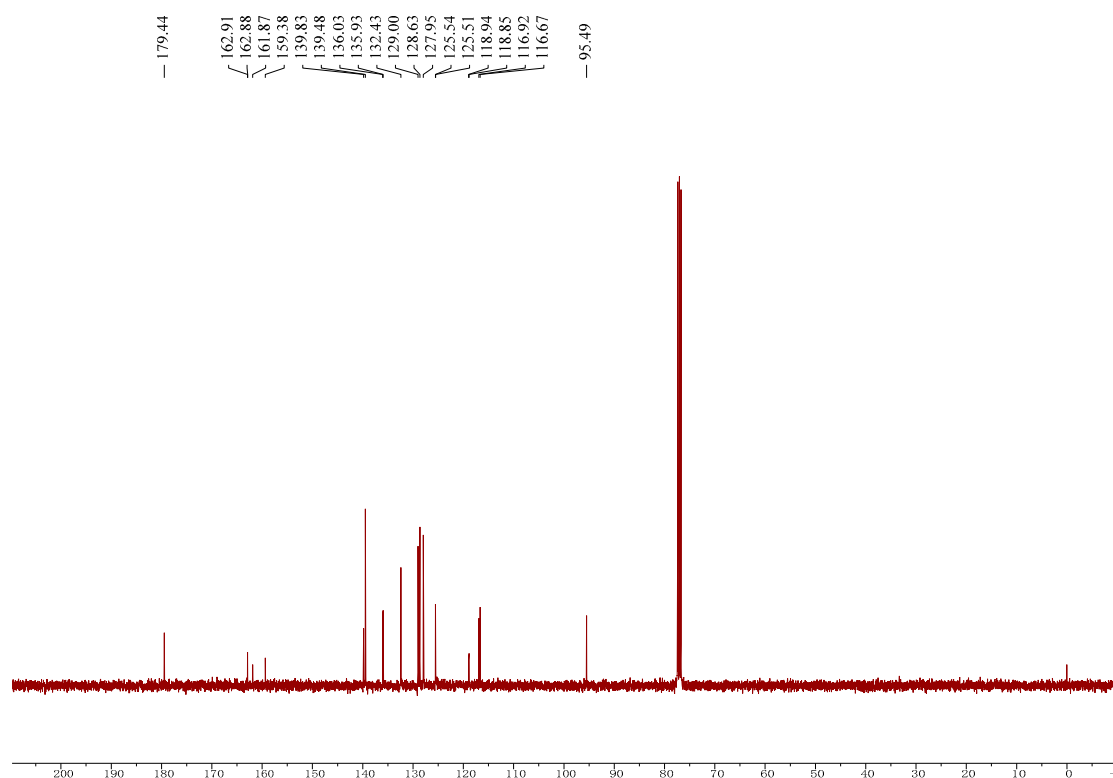

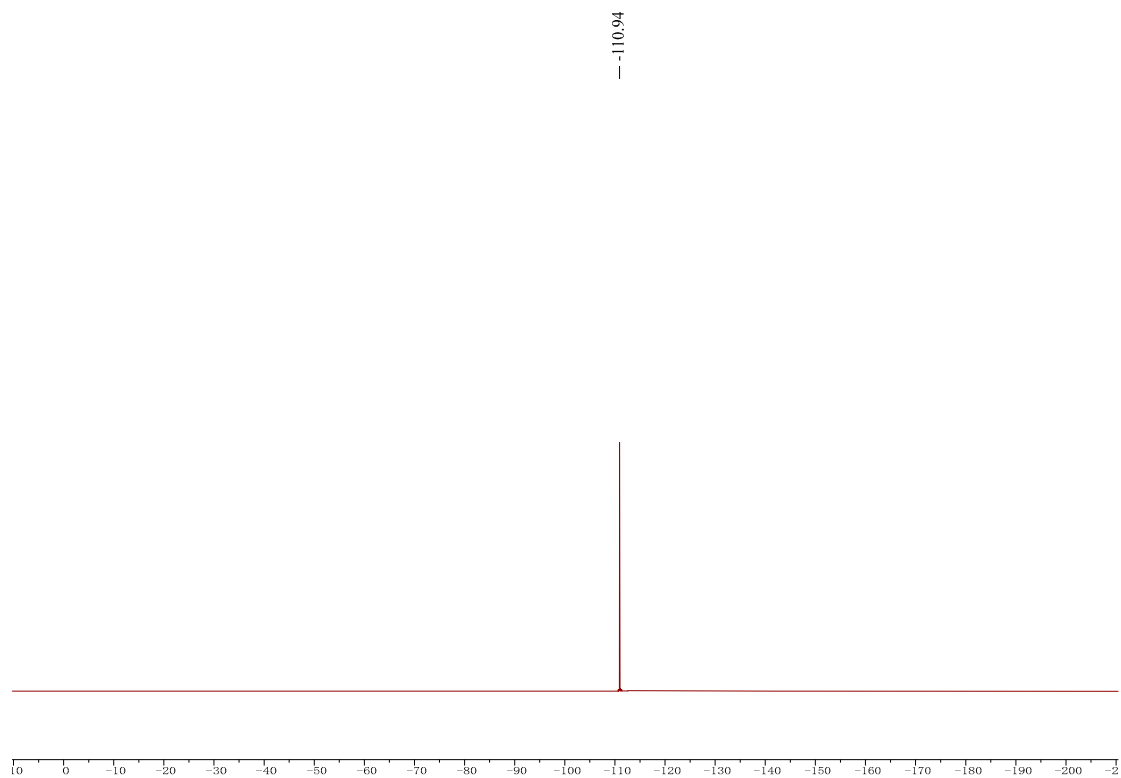

**2-chloro-N-((2-iodophenyl)carbamothioyl)benzamide (2m)**

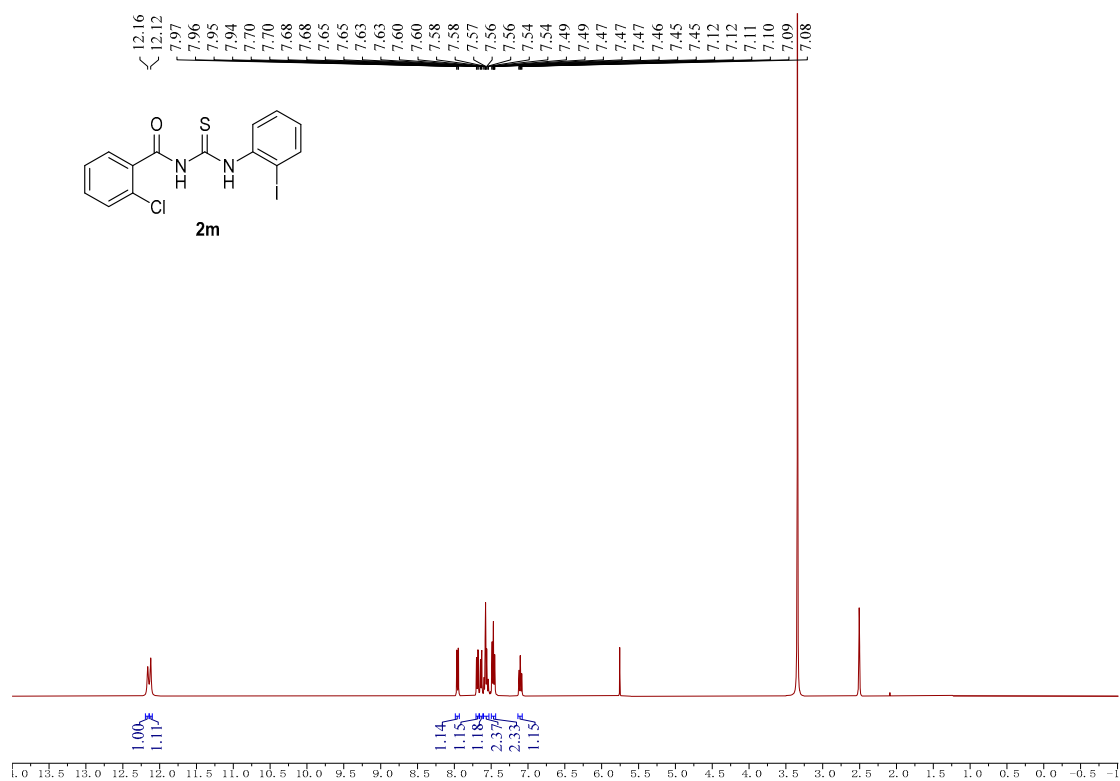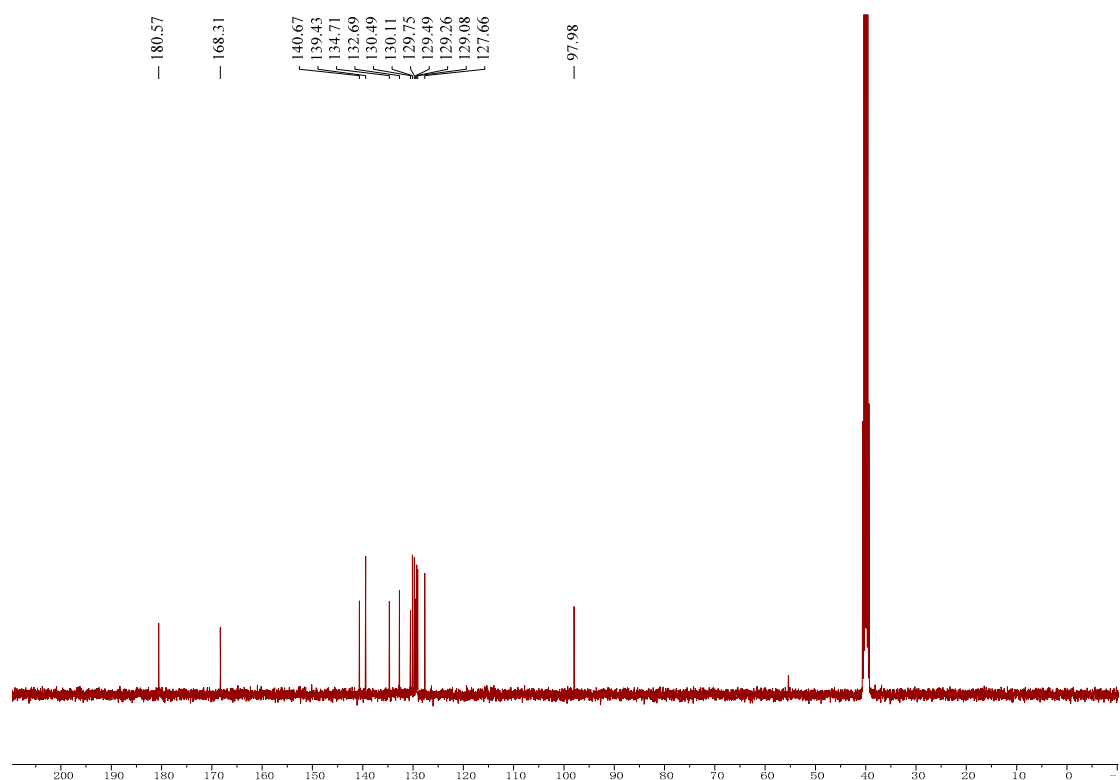

**2-bromo-N-((2-iodophenyl)carbamothioyl)benzamide (2n)**

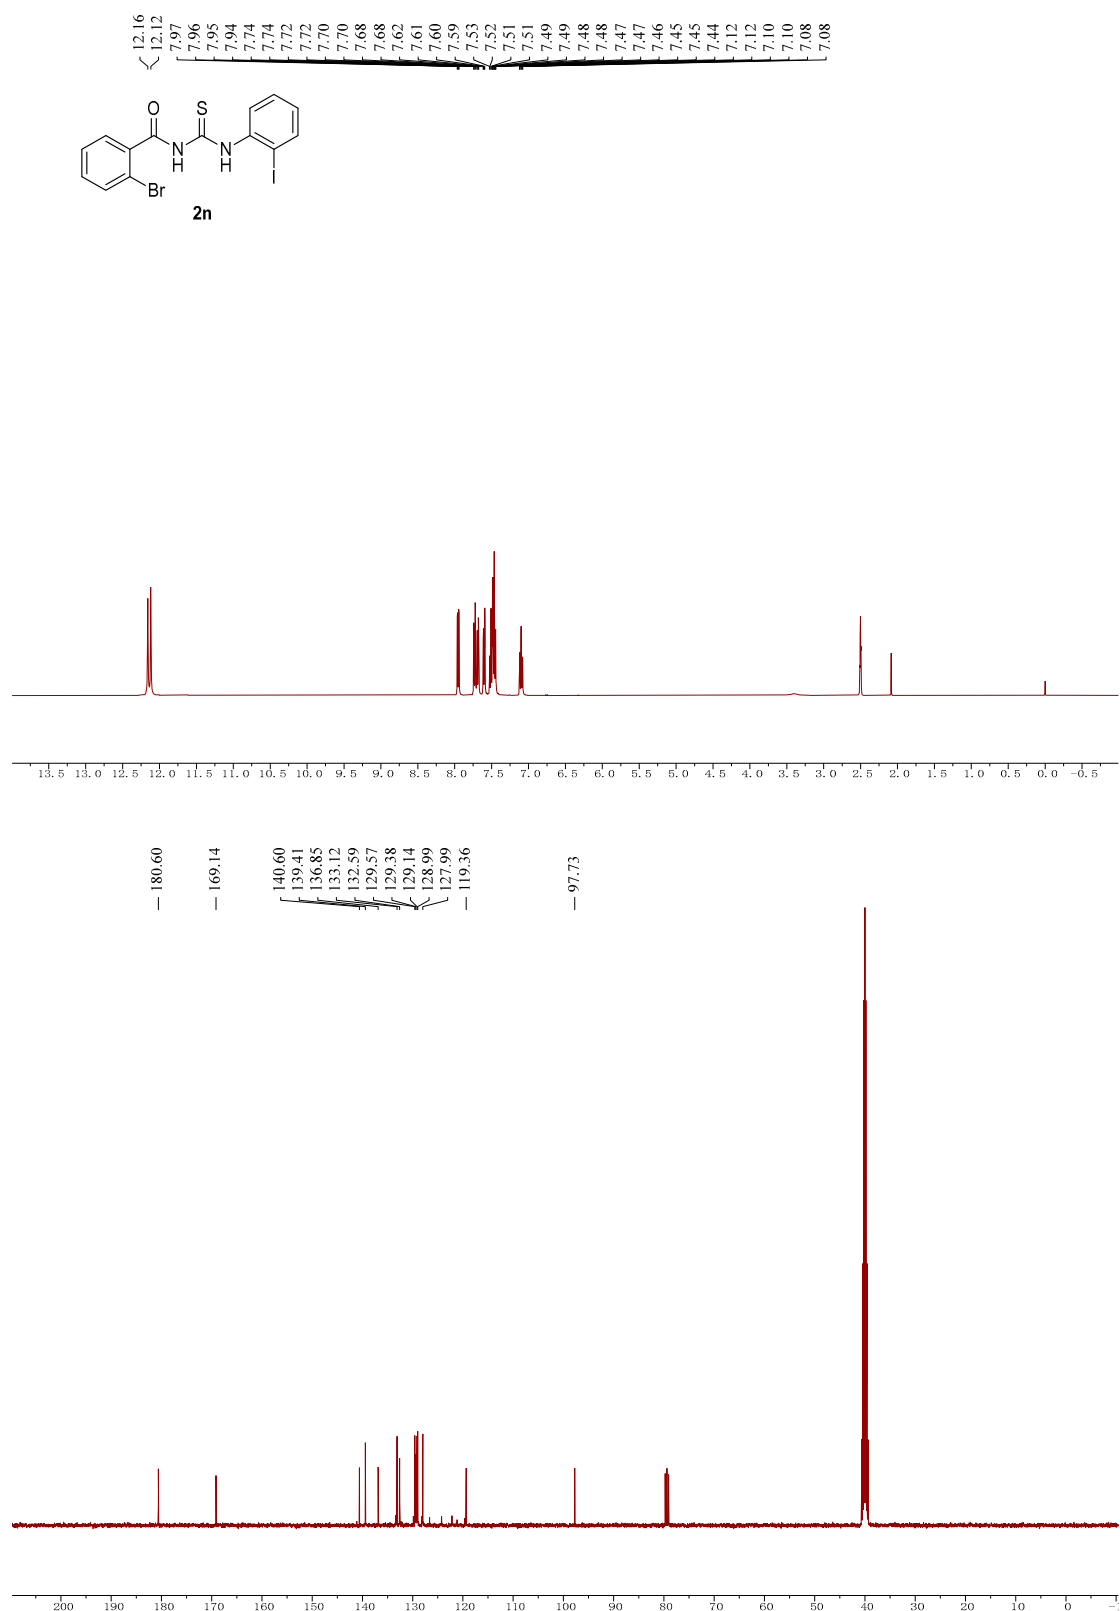

**(Z)-N-(3-(2-iodophenyl)-4-oxo-6-phenyl-3,4-dihydro-2H-1,3-thiazin-2-ylidene)benzamide (3a)**

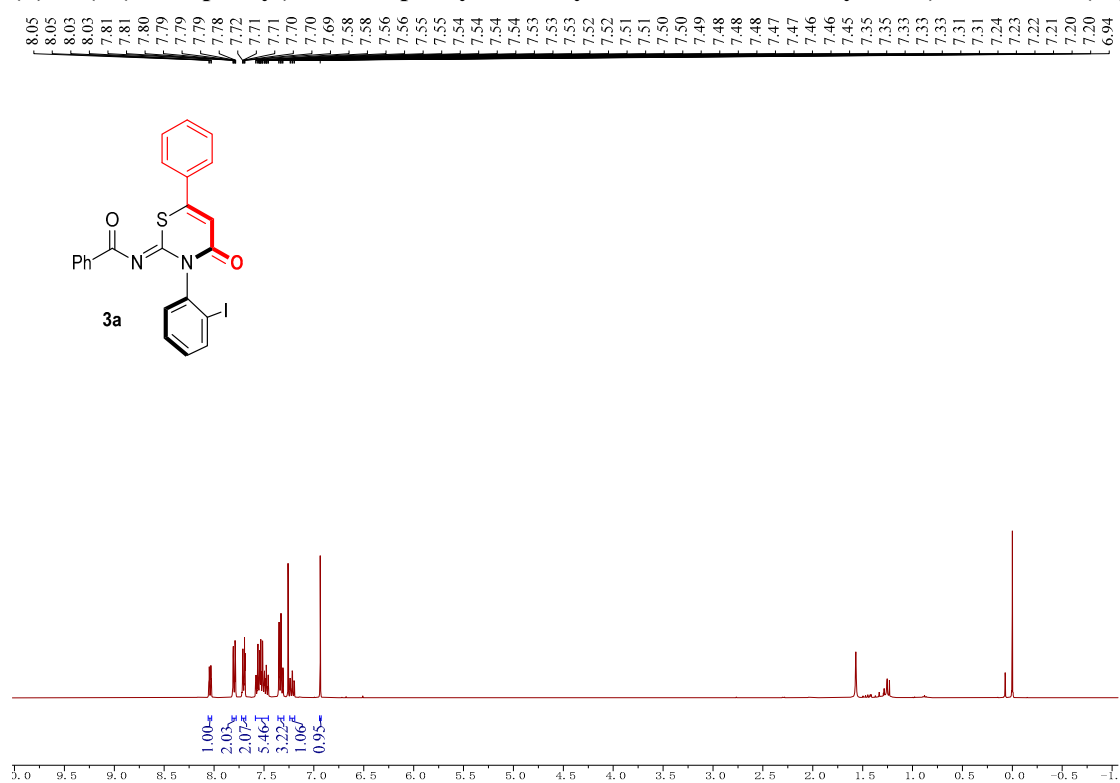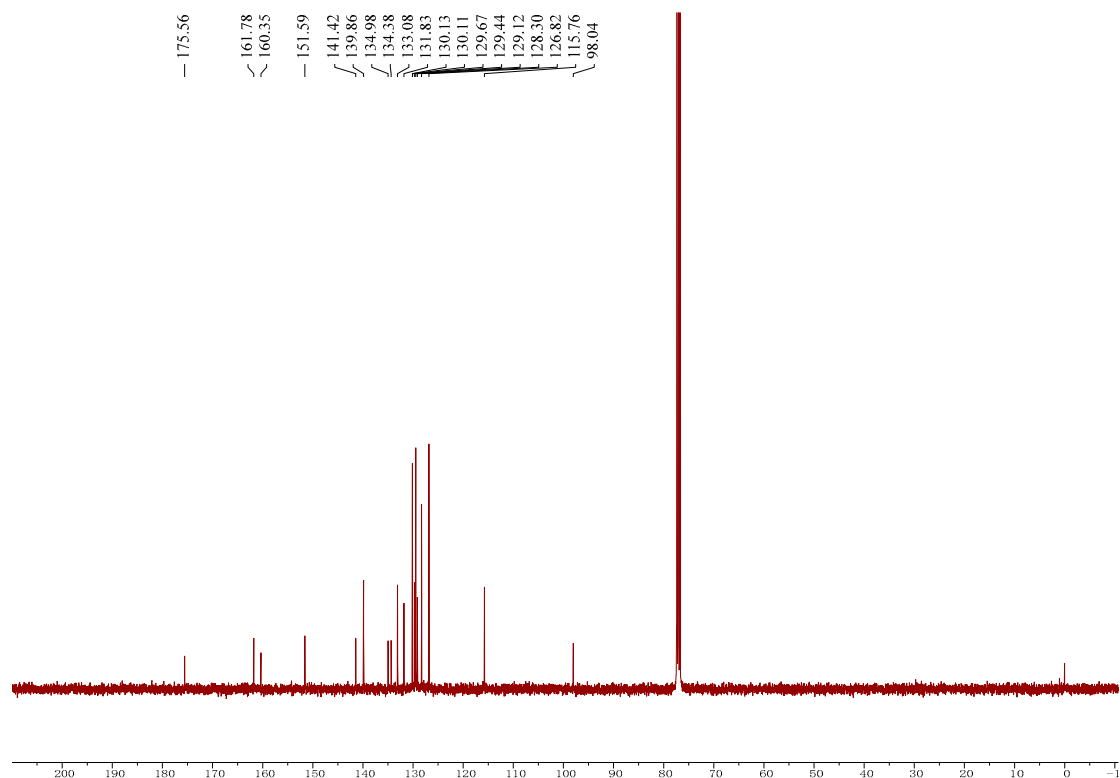

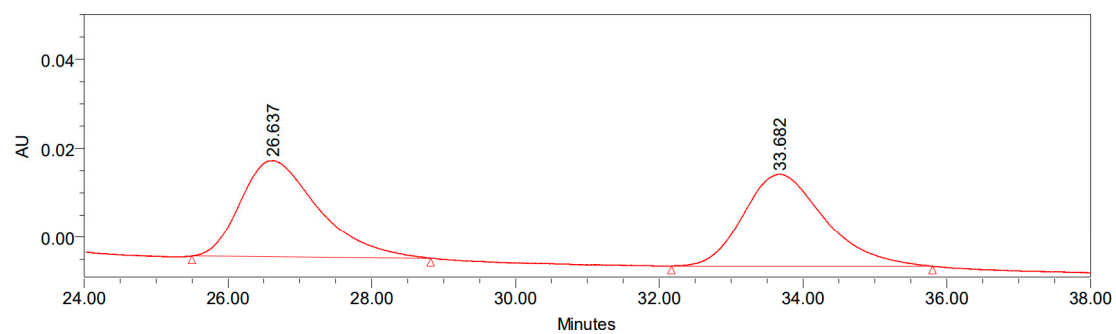

|   | RT     | Area    | % Area | Height |
|---|--------|---------|--------|--------|
| 1 | 26.637 | 1640855 | 50.16  | 21730  |
| 2 | 33.682 | 1630575 | 49.84  | 20736  |

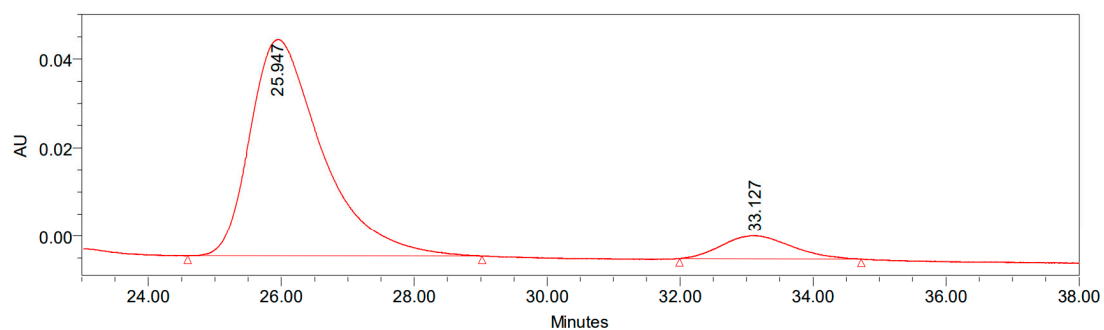

|   | RT     | Area    | % Area | Height |
|---|--------|---------|--------|--------|
| 1 | 25.947 | 3689754 | 90.69  | 48948  |
| 2 | 33.127 | 378983  | 9.31   | 5240   |

**(Z)-N-(3-(2-iodophenyl)-6-(4-methoxyphenyl)-4-oxo-3,4-dihydro-2H-1,3-thiazin-2-ylidene)benzamide (3b)**

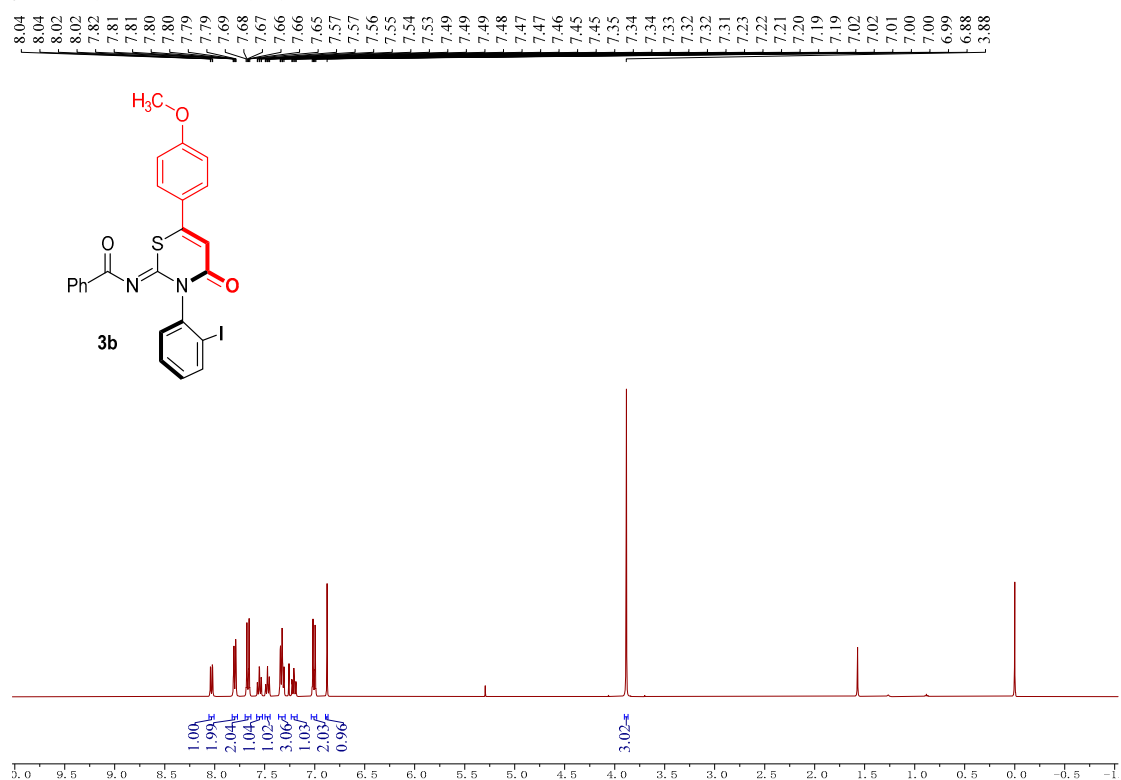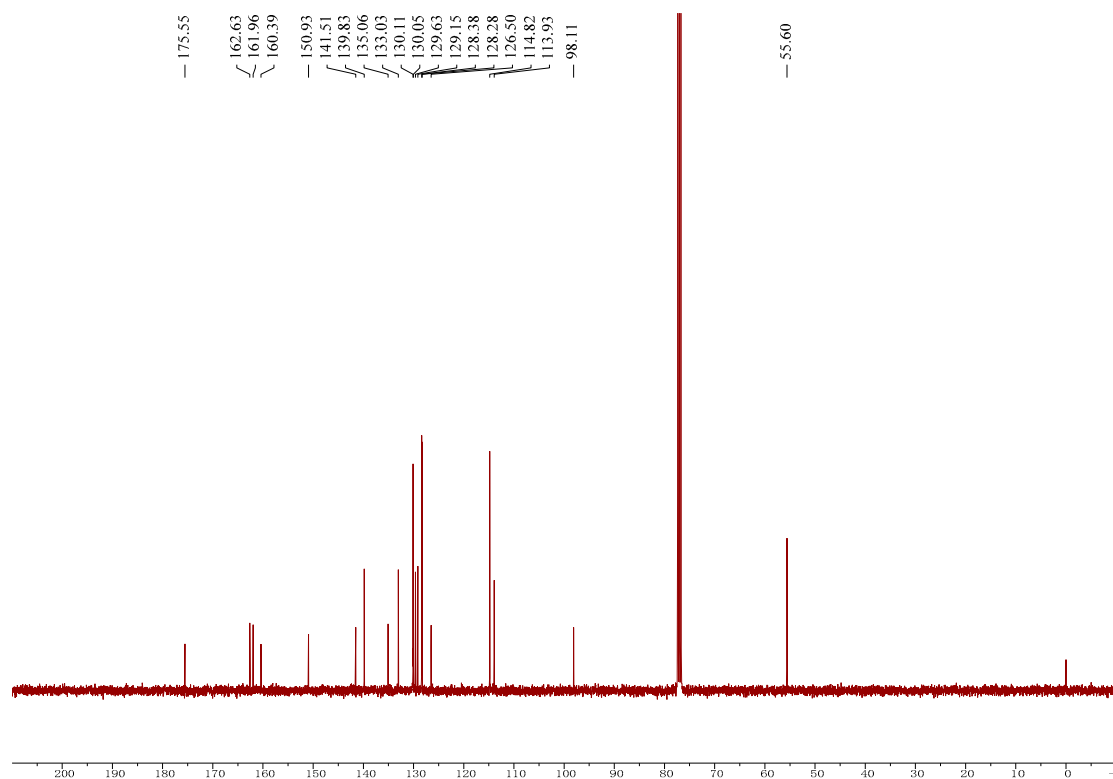



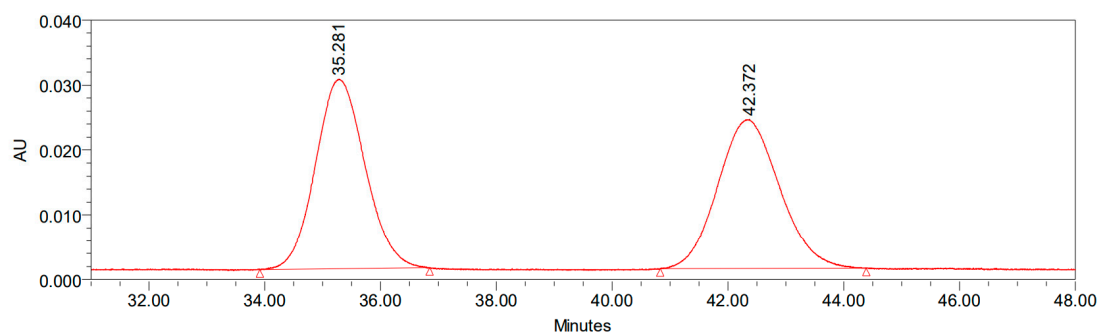

|   | RT     | Area    | % Area | Height |
|---|--------|---------|--------|--------|
| 1 | 35.281 | 1740090 | 50.39  | 29236  |
| 2 | 42.372 | 1712849 | 49.61  | 22988  |

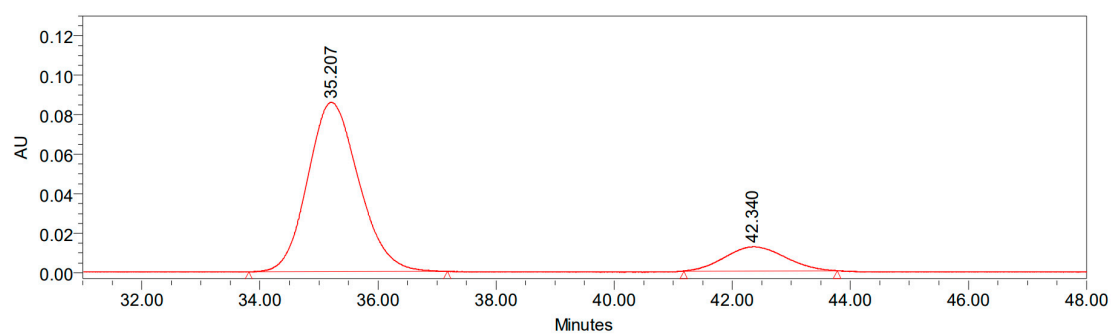

|   | RT     | Area    | % Area | Height |
|---|--------|---------|--------|--------|
| 1 | 35.207 | 5138184 | 85.62  | 85662  |
| 2 | 42.340 | 863117  | 14.38  | 12157  |

**(Z)-N-(3-(2-iodophenyl)-4-oxo-6-(*p*-tolyl)-3,4-dihydro-2*H*-1,3-thiazin-2-ylidene)benzamide  
(3c)**

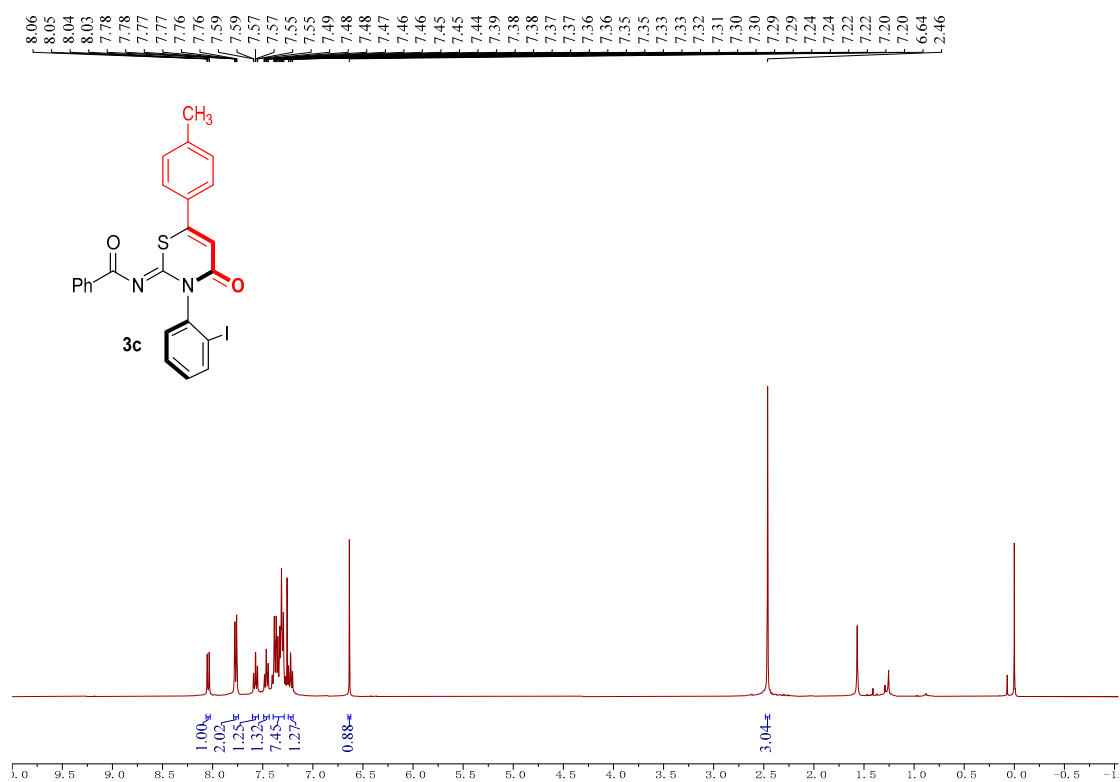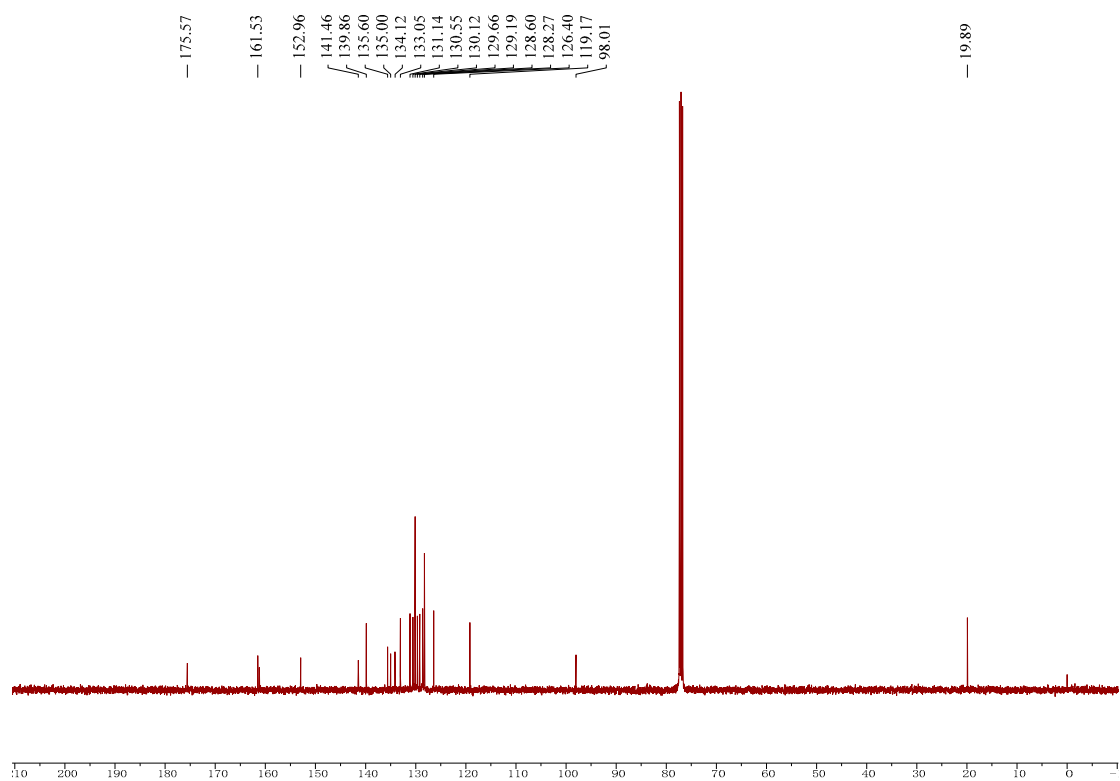

AU

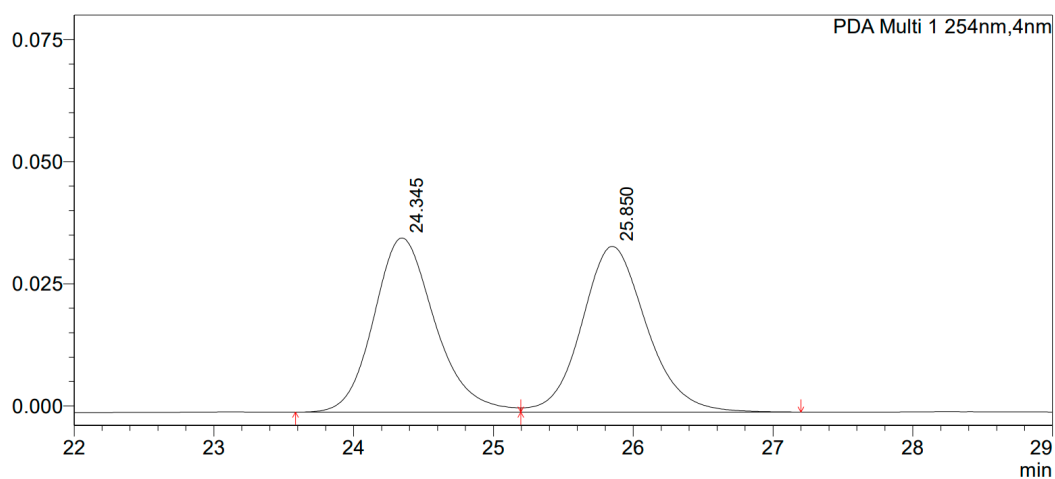

PDA Ch1 254nm

| Peak# | Ret. Time | Area    | Height | Area%   |
|-------|-----------|---------|--------|---------|
| 1     | 24.345    | 1088350 | 35655  | 49.869  |
| 2     | 25.850    | 1094083 | 33935  | 50.131  |
| Total |           | 2182434 | 69590  | 100.000 |

AU

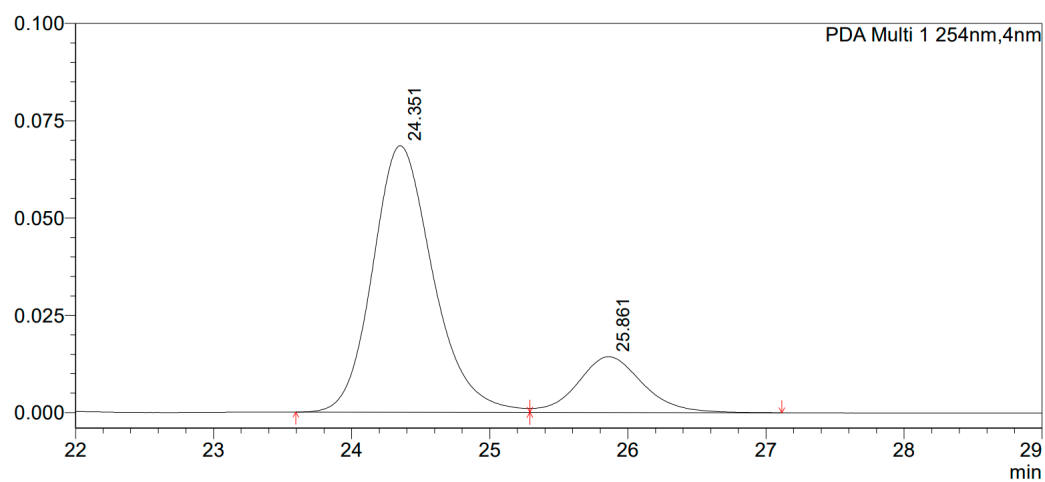

PDA Ch1 254nm

| Peak# | Ret. Time | Area    | Height | Area%   |
|-------|-----------|---------|--------|---------|
| 1     | 24.351    | 2083723 | 68505  | 81.617  |
| 2     | 25.861    | 469324  | 14336  | 18.383  |
| Total |           | 2553047 | 82841  | 100.000 |

**(Z)-N-(6-(4-fluorophenyl)-3-(2-iodophenyl)-4-oxo-3,4-dihydro-2H-1,3-thiazin-2-ylidene)benzamide (3d)**

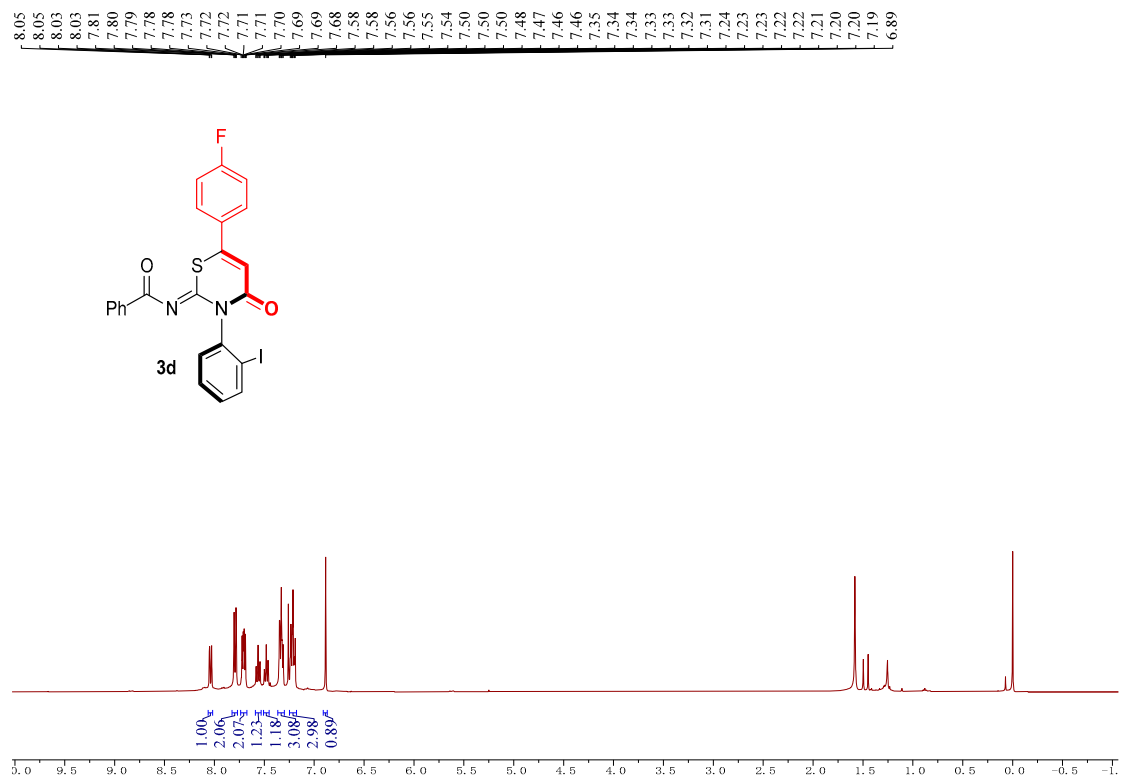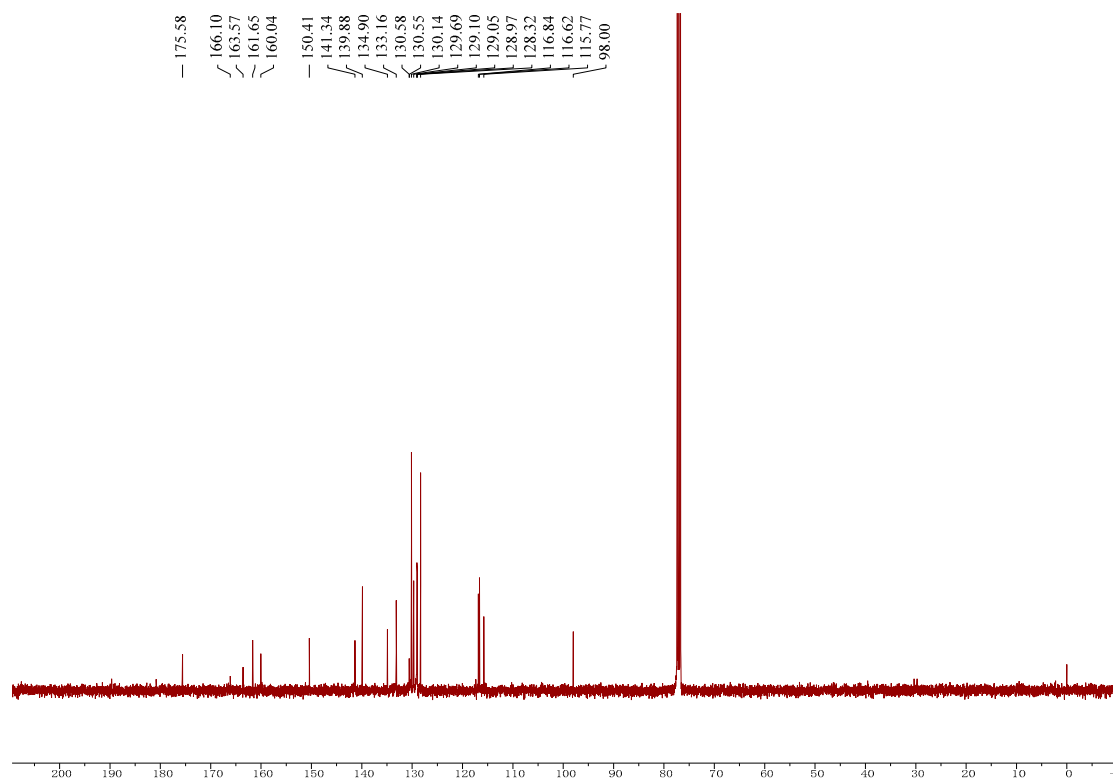

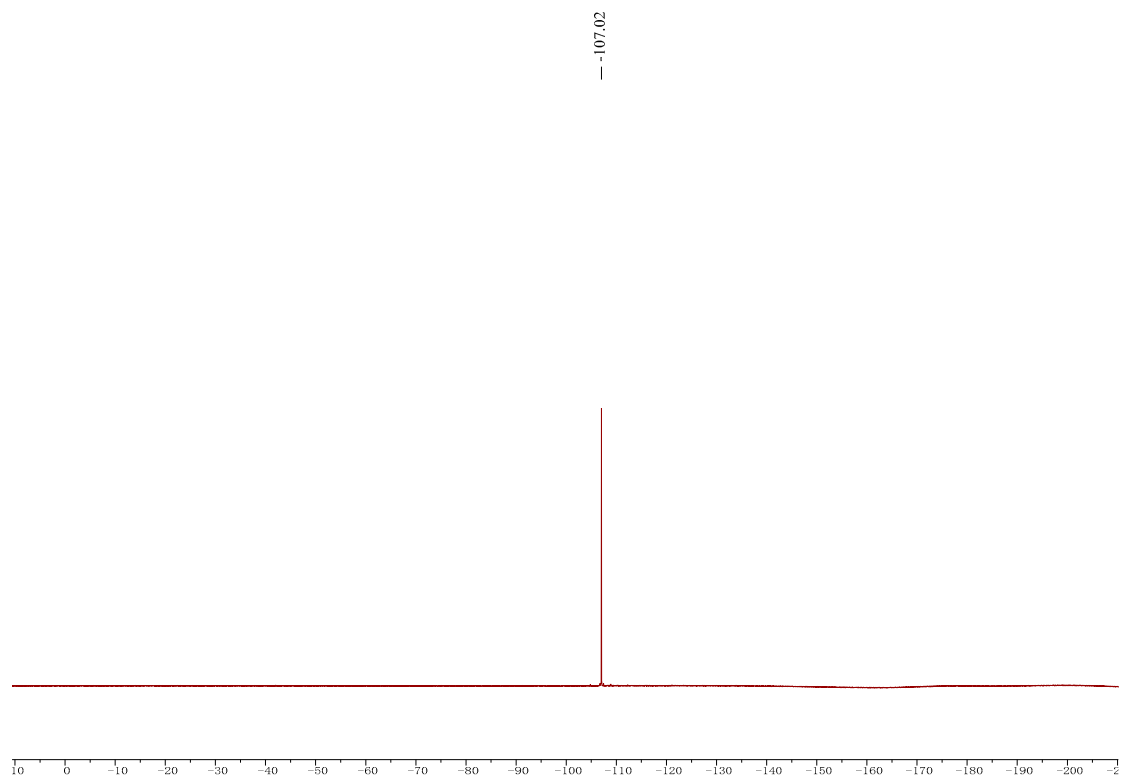

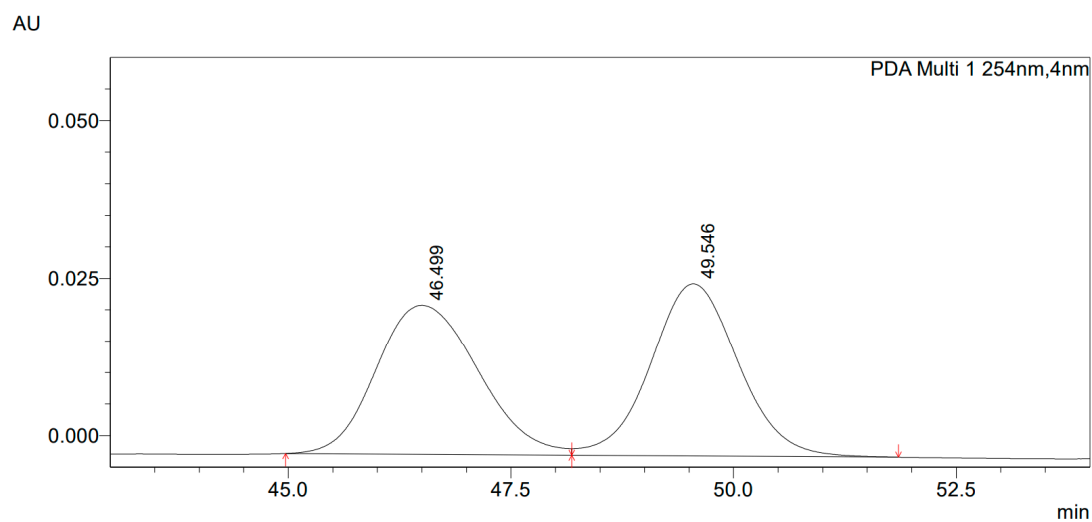

PDA Ch1 254nm

| Peak# | Ret. Time | Area    | Height | Area%   |
|-------|-----------|---------|--------|---------|
| 1     | 46.499    | 1882968 | 23687  | 50.127  |
| 2     | 49.546    | 1873439 | 27352  | 49.873  |
| Total |           | 3756407 | 51039  | 100.000 |

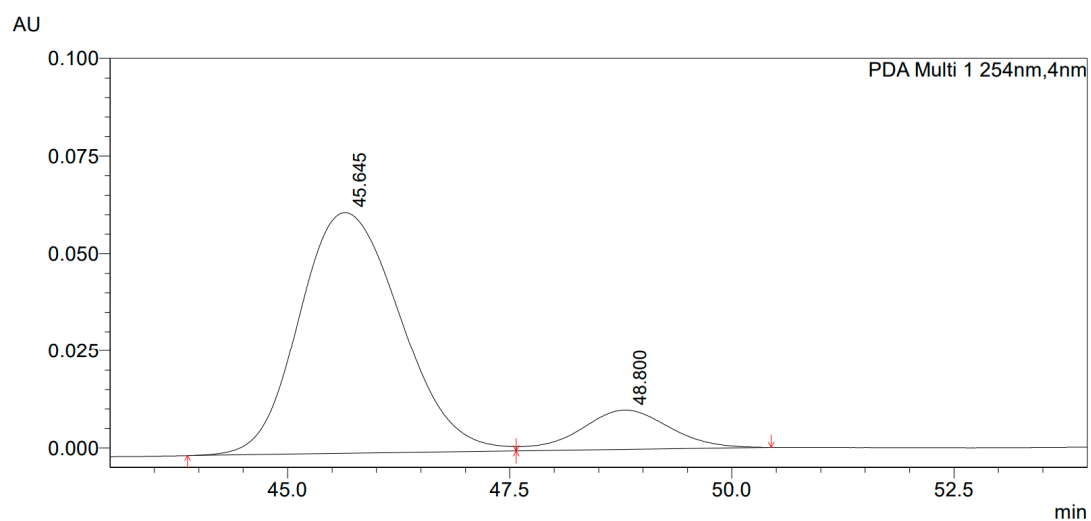

PDA Ch1 254nm

| Peak# | Ret. Time | Area    | Height | Area%   |
|-------|-----------|---------|--------|---------|
| 1     | 45.645    | 4909289 | 61931  | 87.462  |
| 2     | 48.800    | 703779  | 10080  | 12.538  |
| Total |           | 5613068 | 72011  | 100.000 |

**(Z)-N-(6-(4-chlorophenyl)-3-(2-iodophenyl)-4-oxo-3,4-dihydro-2H-1,3-thiazin-2-ylidene)benzamide (3e)**

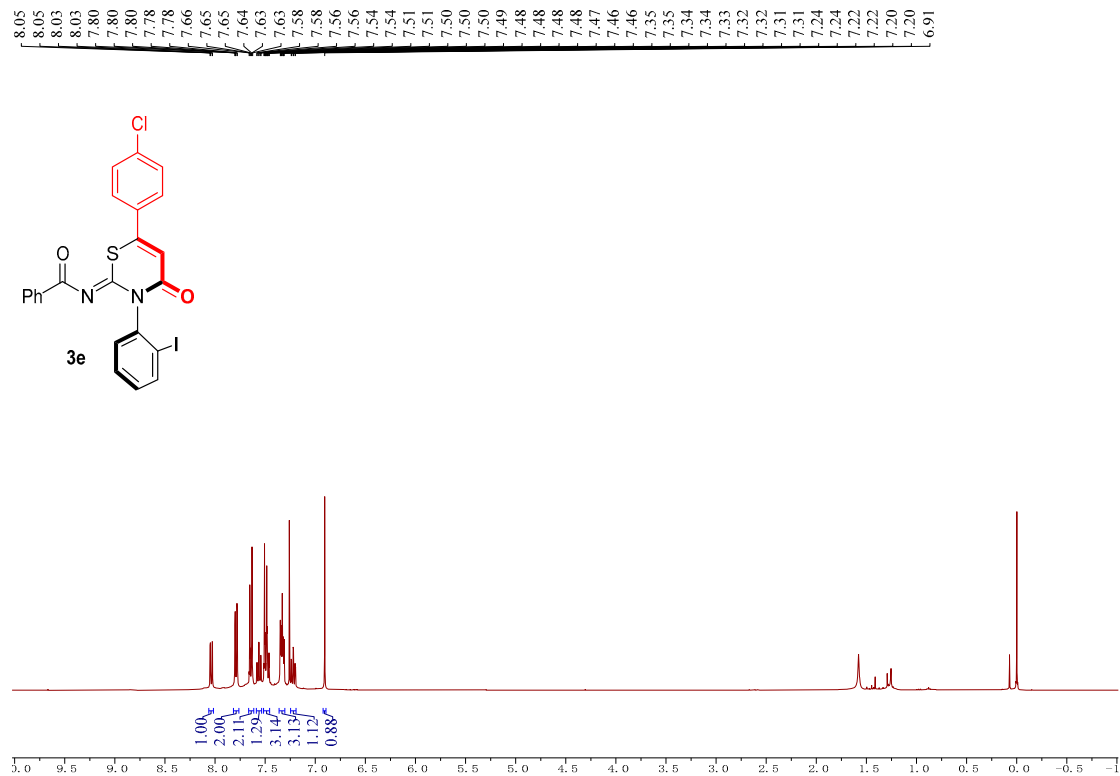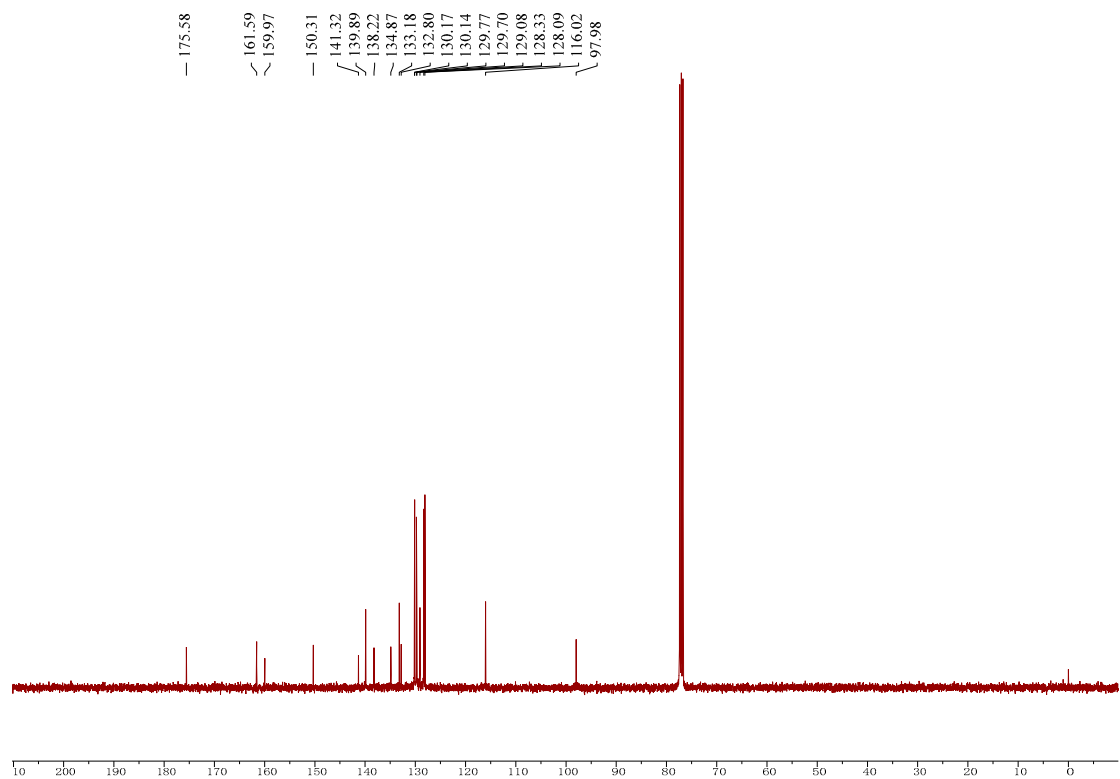

AU

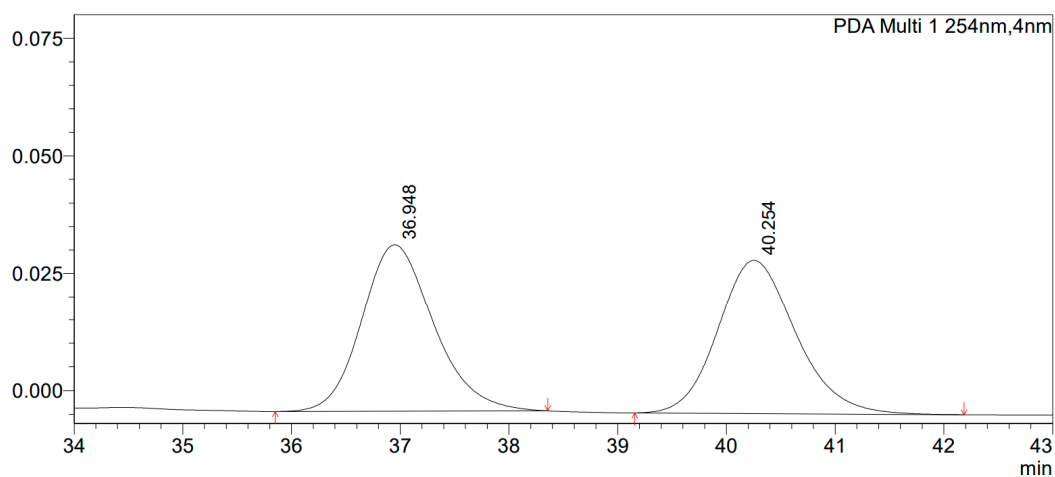

PDA Ch1 254nm

| Peak# | Ret. Time | Area    | Height | Area%   |
|-------|-----------|---------|--------|---------|
| 1     | 36.948    | 1631308 | 35489  | 50.121  |
| 2     | 40.254    | 1623460 | 32653  | 49.879  |
| Total |           | 3254768 | 68142  | 100.000 |

AU

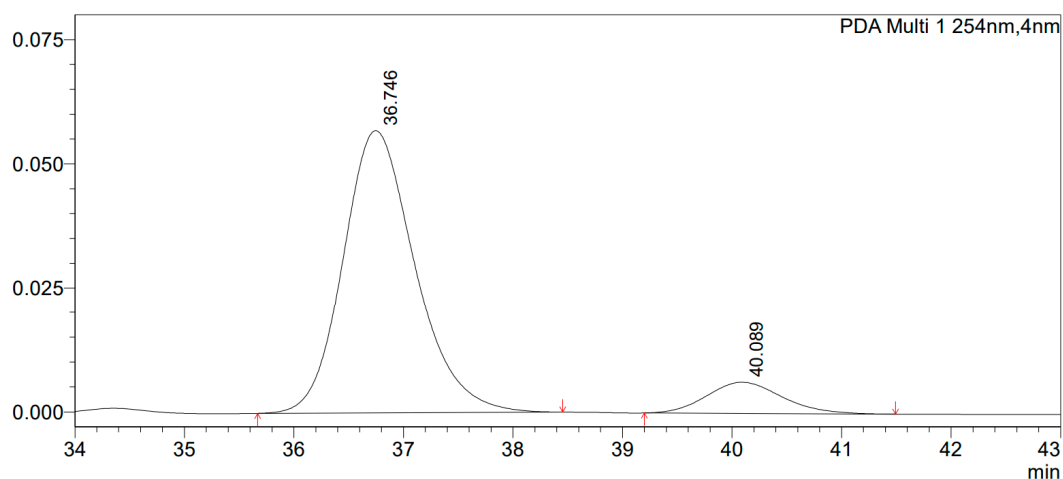

PDA Ch1 254nm

| Peak# | Ret. Time | Area    | Height | Area%   |
|-------|-----------|---------|--------|---------|
| 1     | 36.746    | 2597171 | 56881  | 89.680  |
| 2     | 40.089    | 298860  | 6231   | 10.320  |
| Total |           | 2896031 | 63112  | 100.000 |



**(Z)-N-(6-(4-bromophenyl)-3-(2-iodophenyl)-4-oxo-3,4-dihydro-2H-1,3-thiazin-2-ylidene)benzamide (3f)**

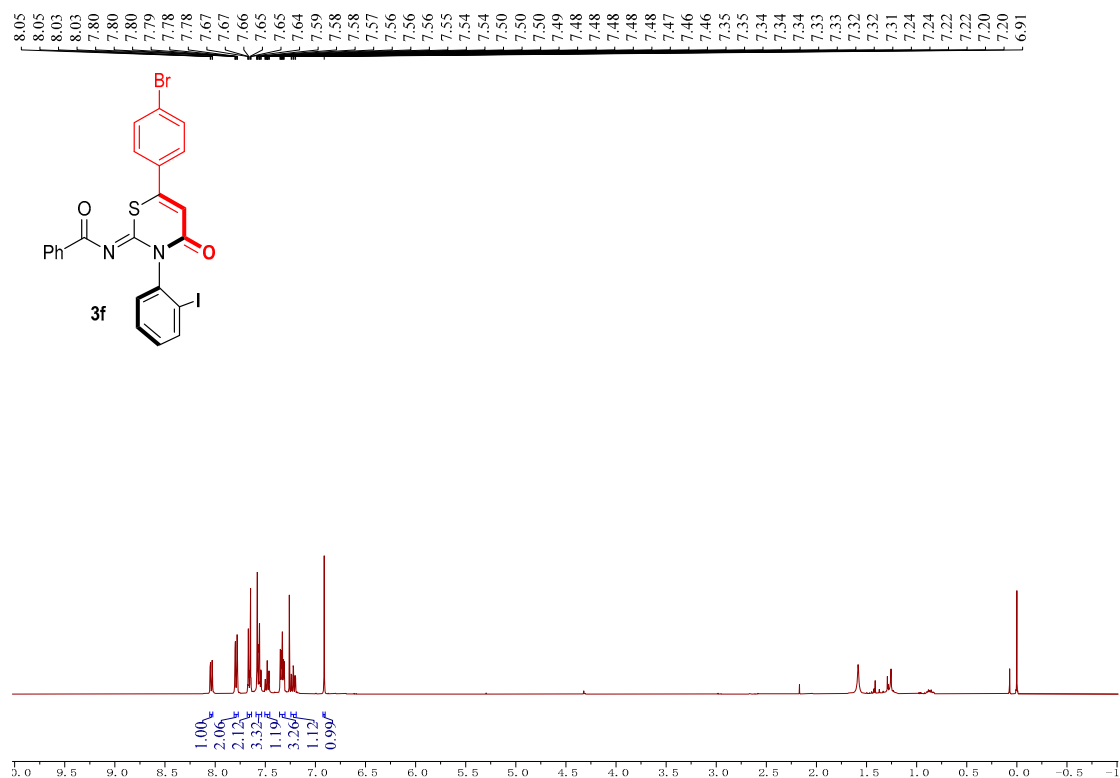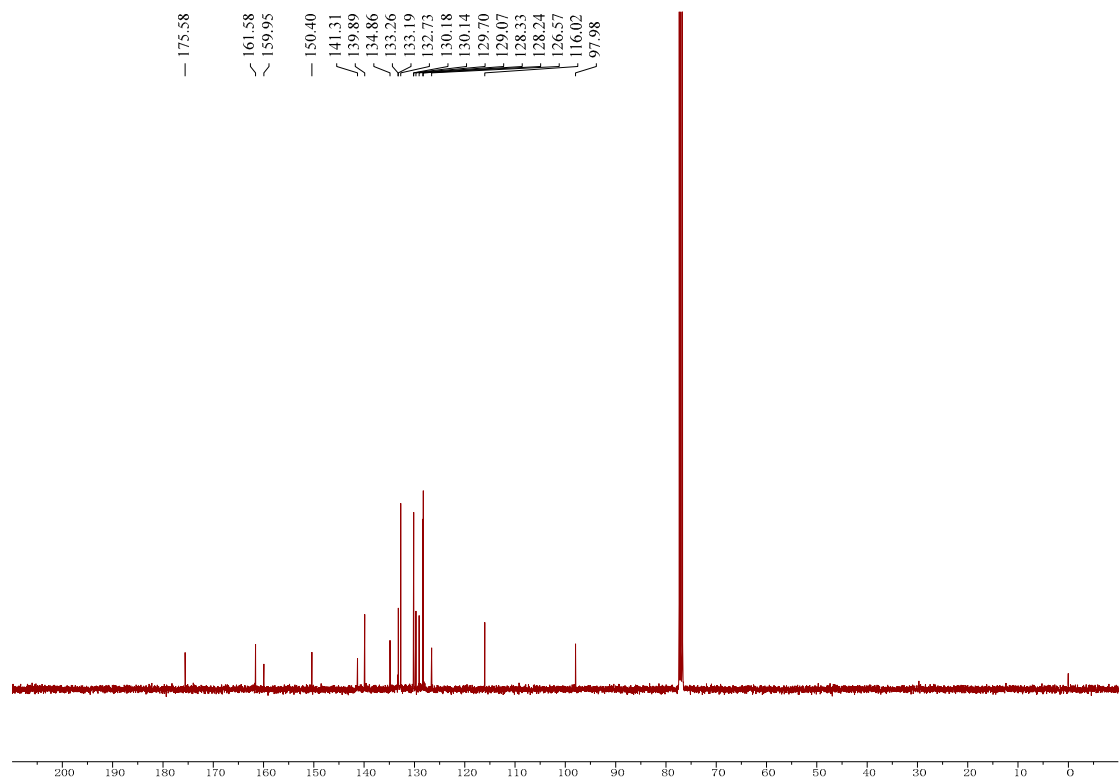

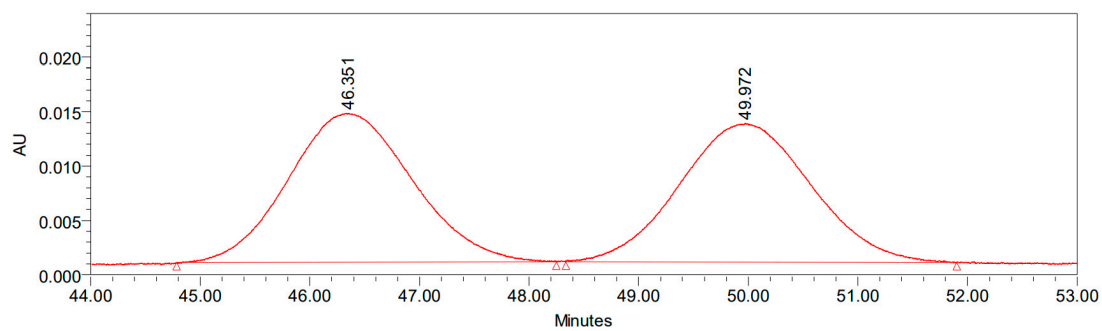

|   | RT     | Area    | % Area | Height |
|---|--------|---------|--------|--------|
| 1 | 46.351 | 1075745 | 50.34  | 13697  |
| 2 | 49.972 | 1061017 | 49.66  | 12753  |

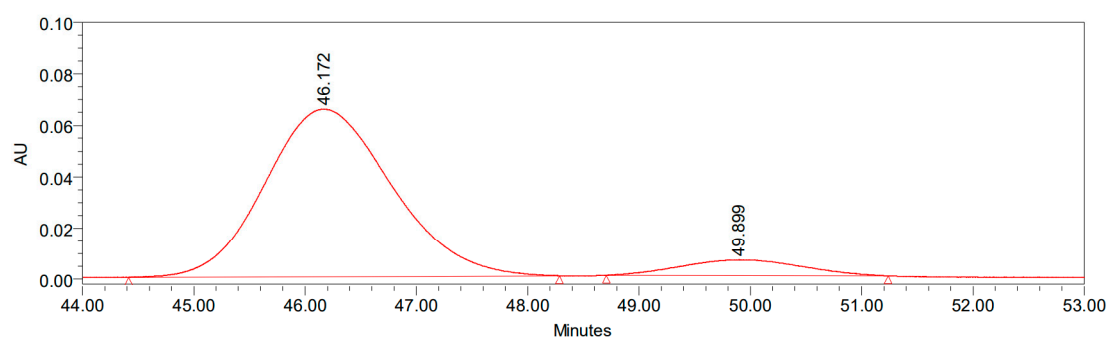

|   | RT     | Area    | % Area | Height |
|---|--------|---------|--------|--------|
| 1 | 46.172 | 5179775 | 91.79  | 65276  |
| 2 | 49.899 | 463034  | 8.21   | 6142   |

**(Z)-N-(3-(2-iodophenyl)-6-(3-methoxyphenyl)-4-oxo-3,4-dihydro-2H-1,3-thiazin-2-ylidene)benzamide (3g)**

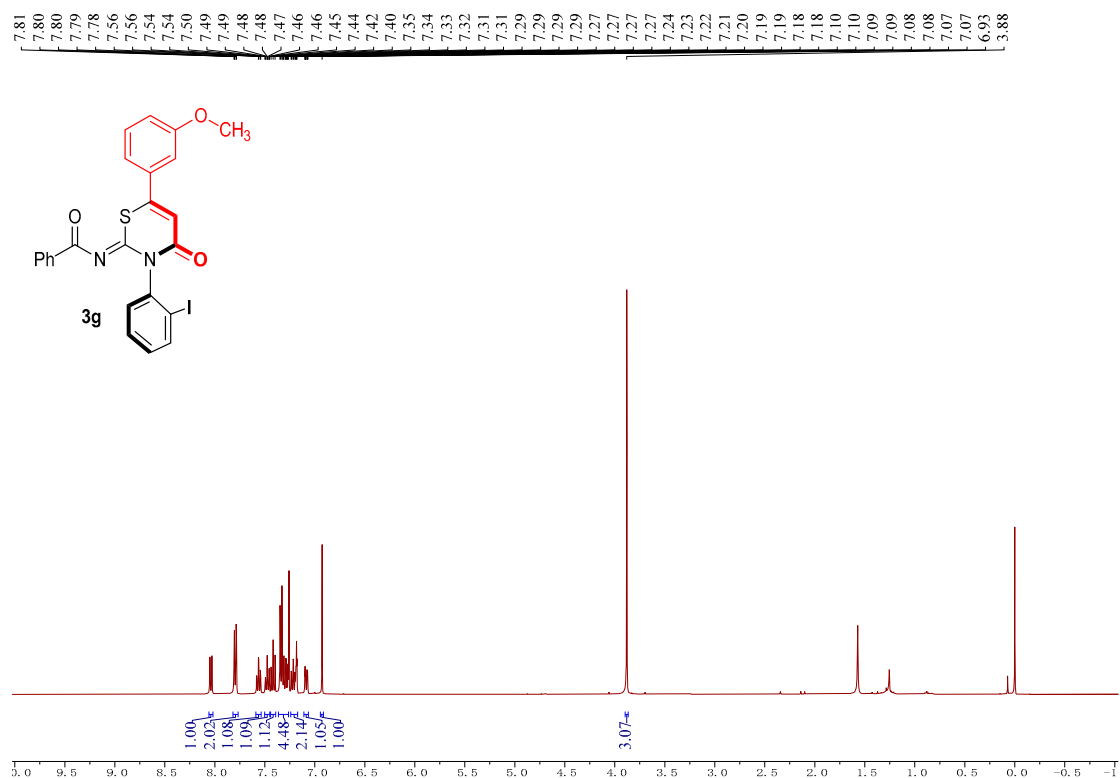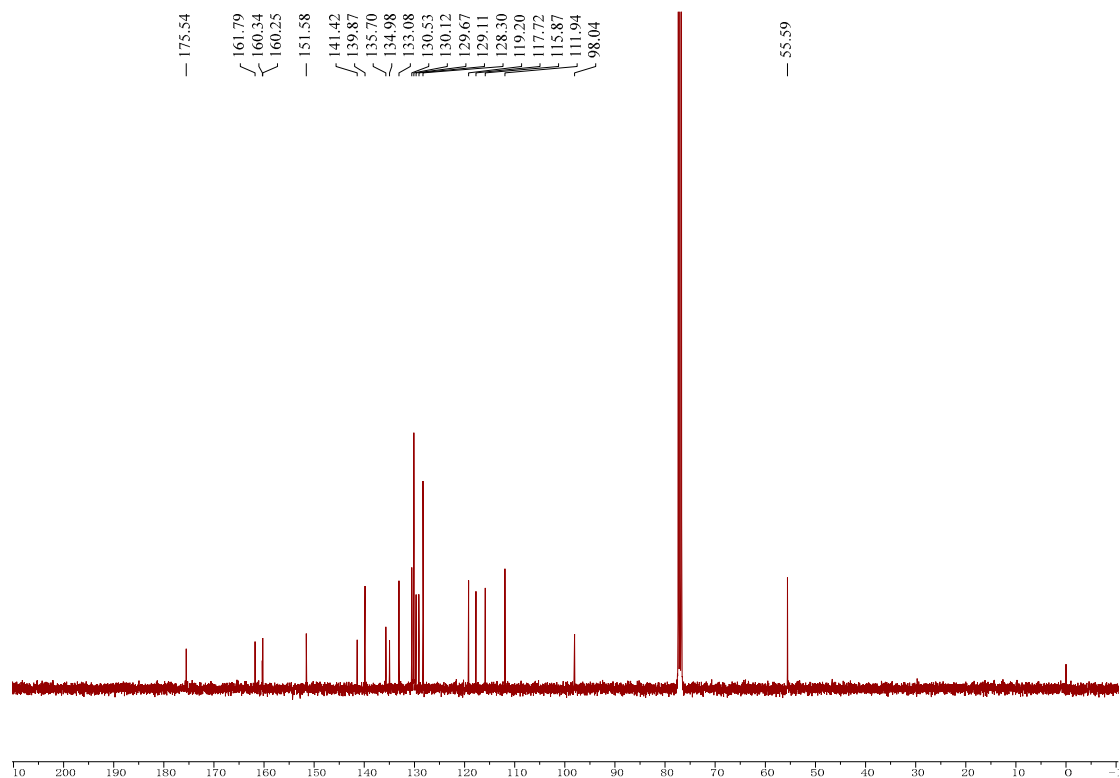

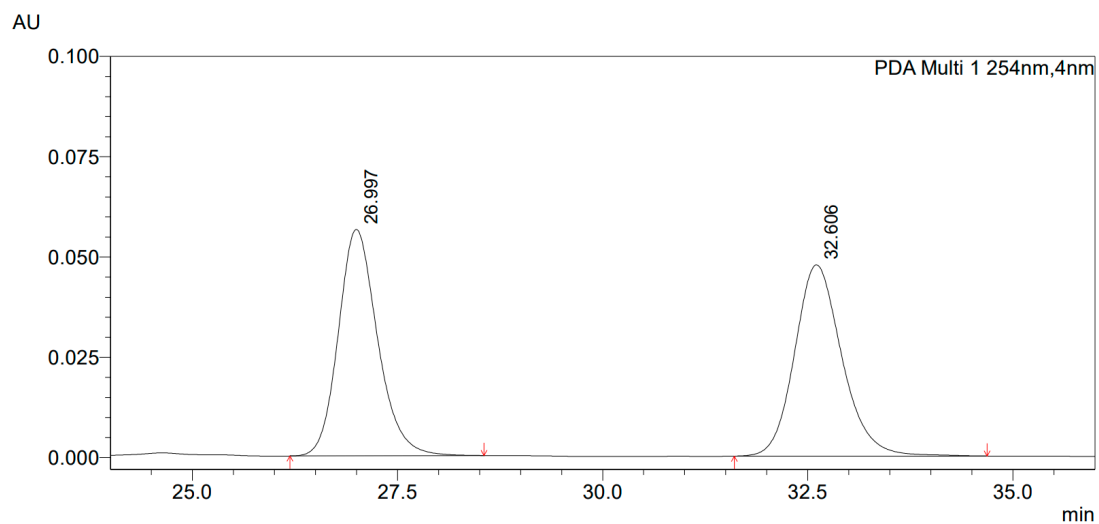

PDA Ch1 254nm

| Peak# | Ret. Time | Area    | Height | Area%   |
|-------|-----------|---------|--------|---------|
| 1     | 26.997    | 1880331 | 56480  | 49.536  |
| 2     | 32.606    | 1915548 | 47695  | 50.464  |
| Total |           | 3795879 | 104175 | 100.000 |

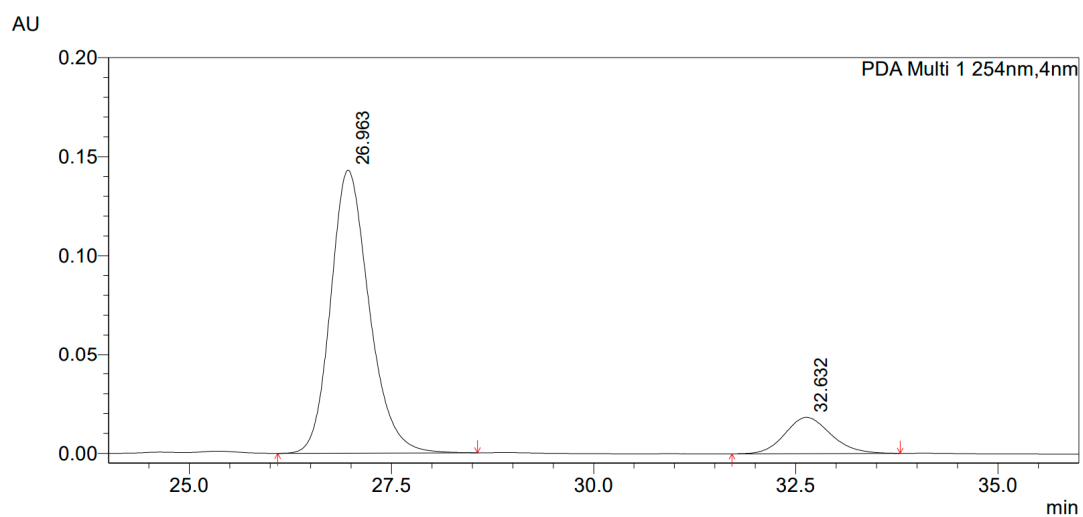

PDA Ch1 254nm

| Peak# | Ret. Time | Area    | Height | Area%   |
|-------|-----------|---------|--------|---------|
| 1     | 26.963    | 4743177 | 143156 | 86.833  |
| 2     | 32.632    | 719218  | 18206  | 13.167  |
| Total |           | 5462395 | 161362 | 100.000 |

**(Z)-N-(3-(2-iodophenyl)-4-oxo-6-(*m*-tolyl)-3,4-dihydro-2H-1,3-thiazin-2-ylidene)benzamide  
(3h)**

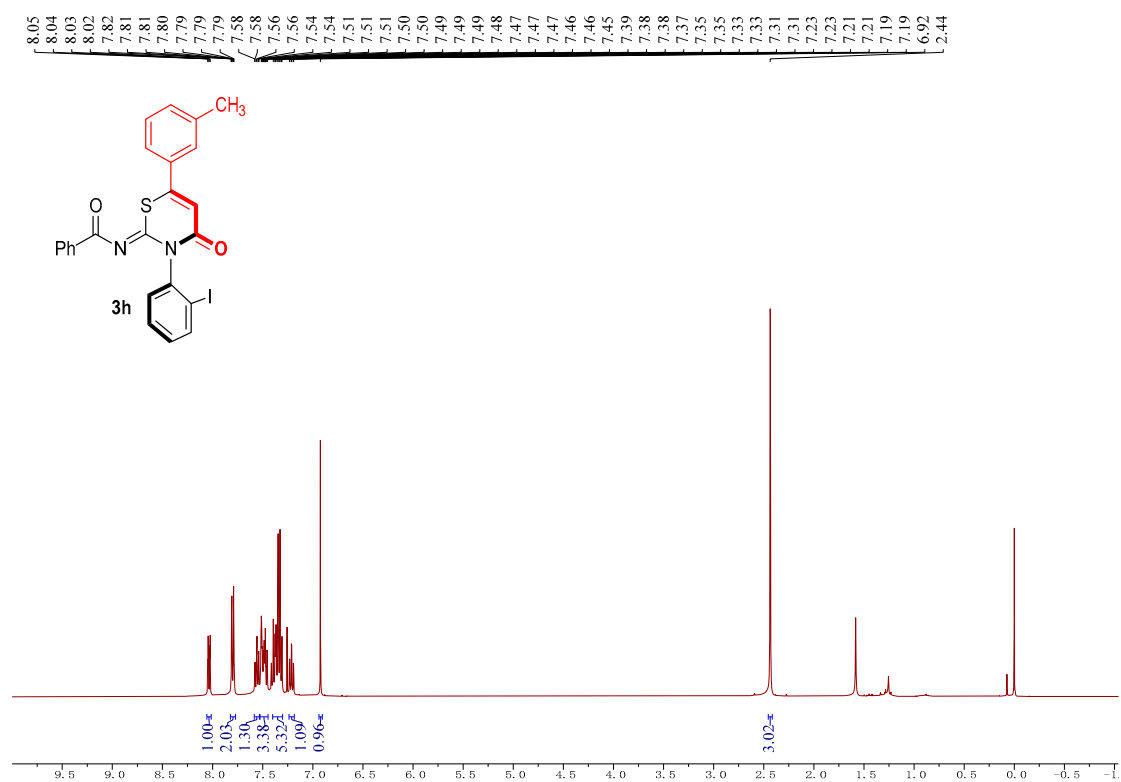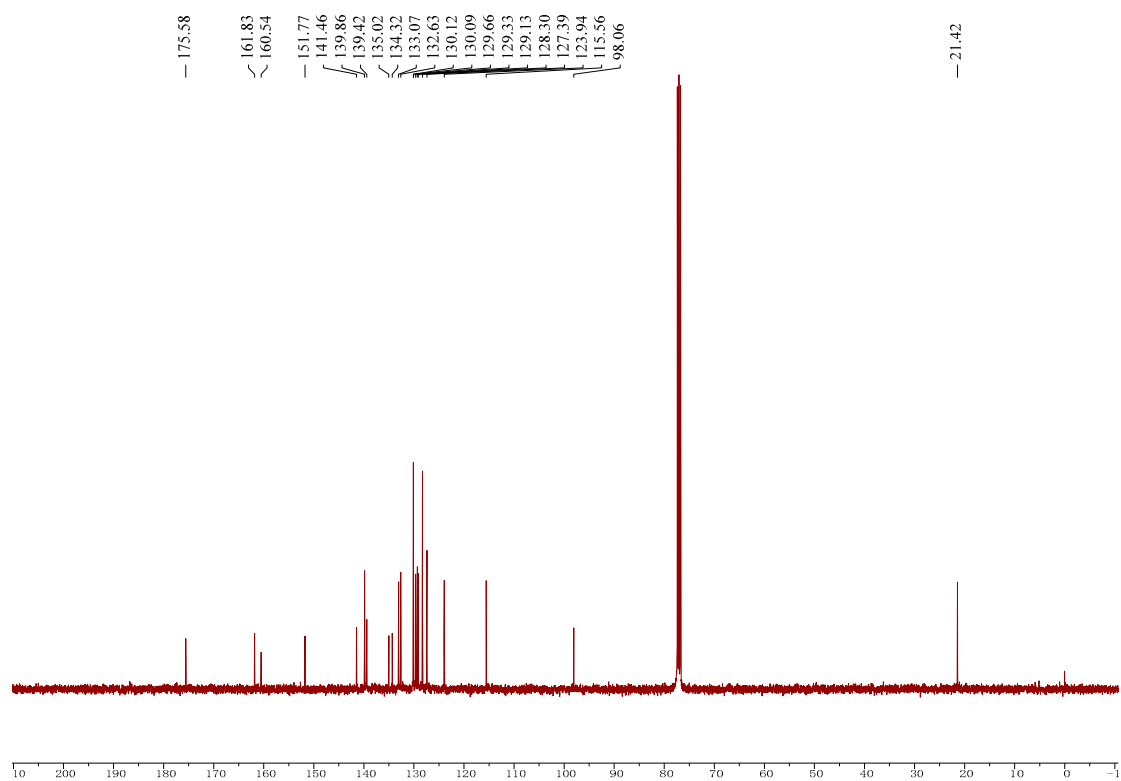

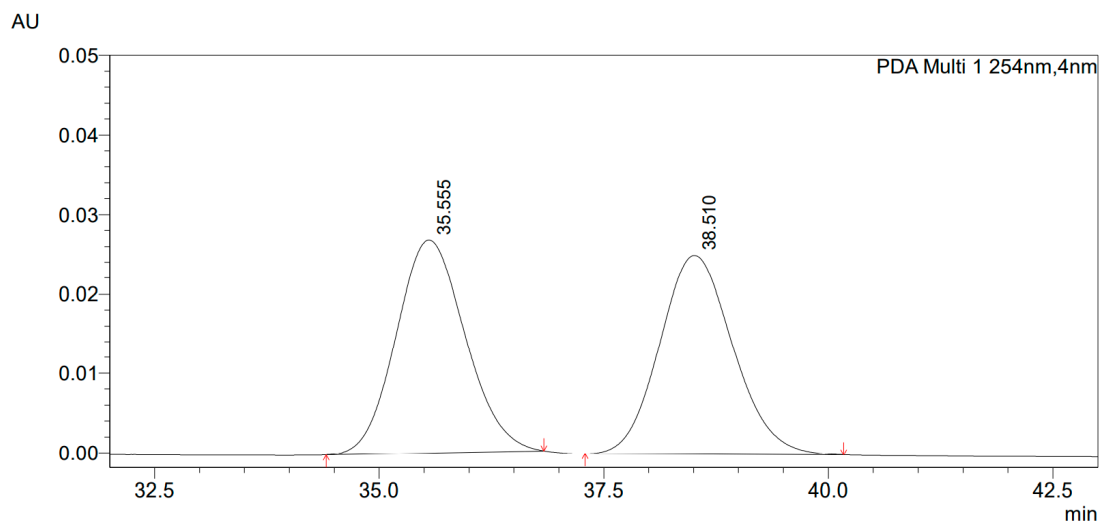

| PDA Ch1 254nm |           |         |        |         |
|---------------|-----------|---------|--------|---------|
| Peak#         | Ret. Time | Area    | Height | Area%   |
| 1             | 35.555    | 1433013 | 26833  | 50.256  |
| 2             | 38.510    | 1418423 | 25042  | 49.744  |
| Total         |           | 2851436 | 51875  | 100.000 |

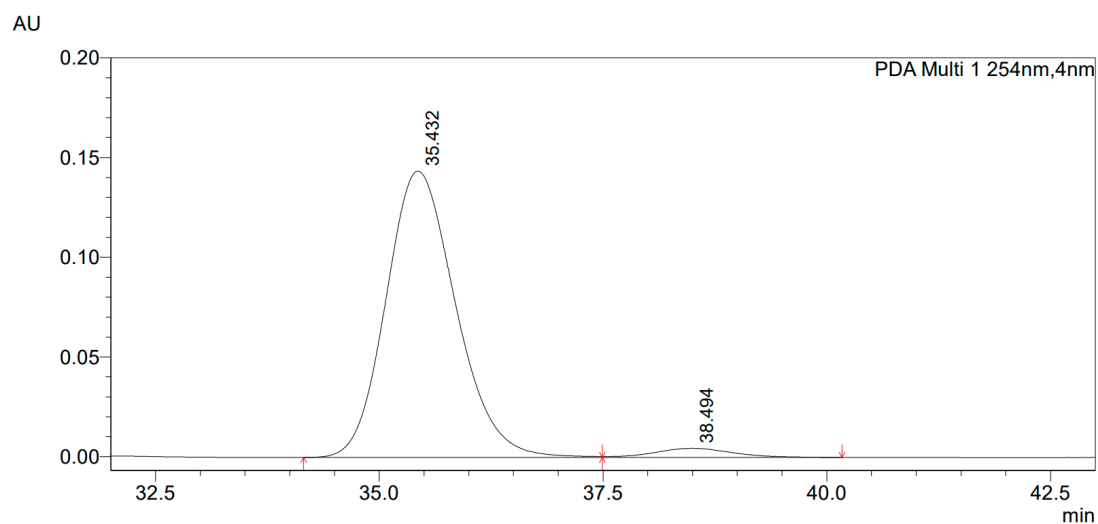

| PDA Ch1 254nm |           |         |        |         |
|---------------|-----------|---------|--------|---------|
| Peak#         | Ret. Time | Area    | Height | Area%   |
| 1             | 35.432    | 7777142 | 143595 | 96.529  |
| 2             | 38.494    | 279612  | 4602   | 3.471   |
| Total         |           | 8056754 | 148197 | 100.000 |

**(Z)-N-(6-(3-fluorophenyl)-3-(2-iodophenyl)-4-oxo-3,4-dihydro-2H-1,3-thiazin-2-ylidene)benzamide (3i)**

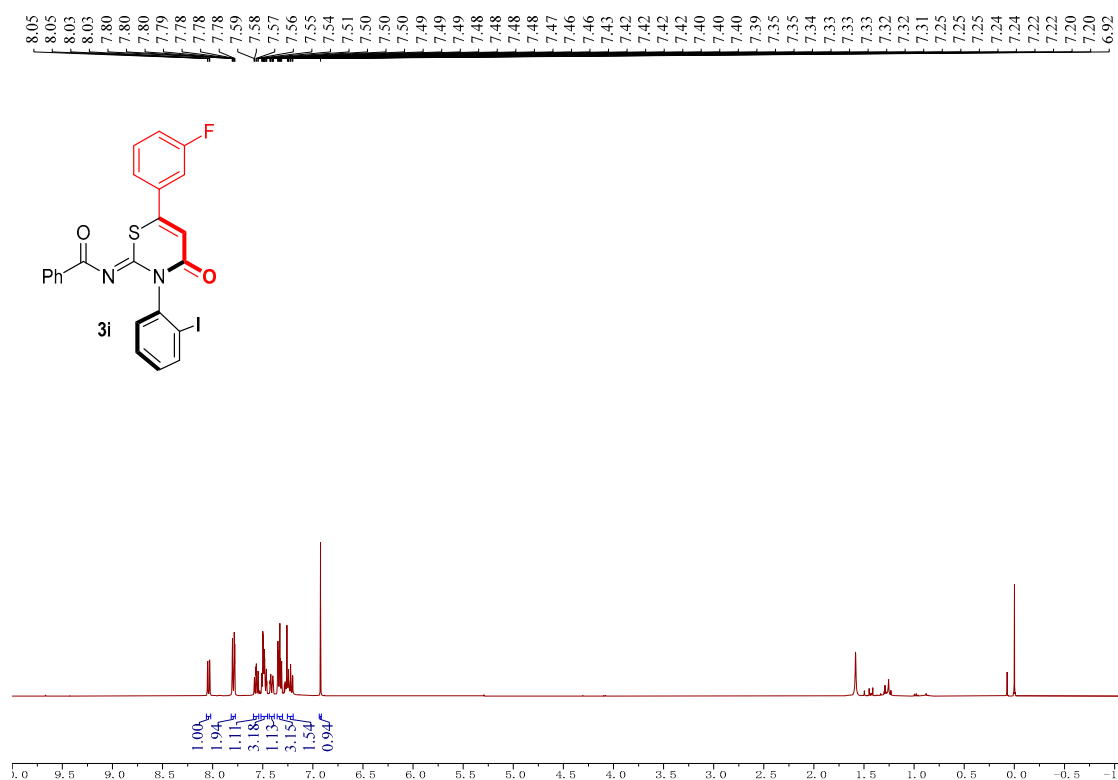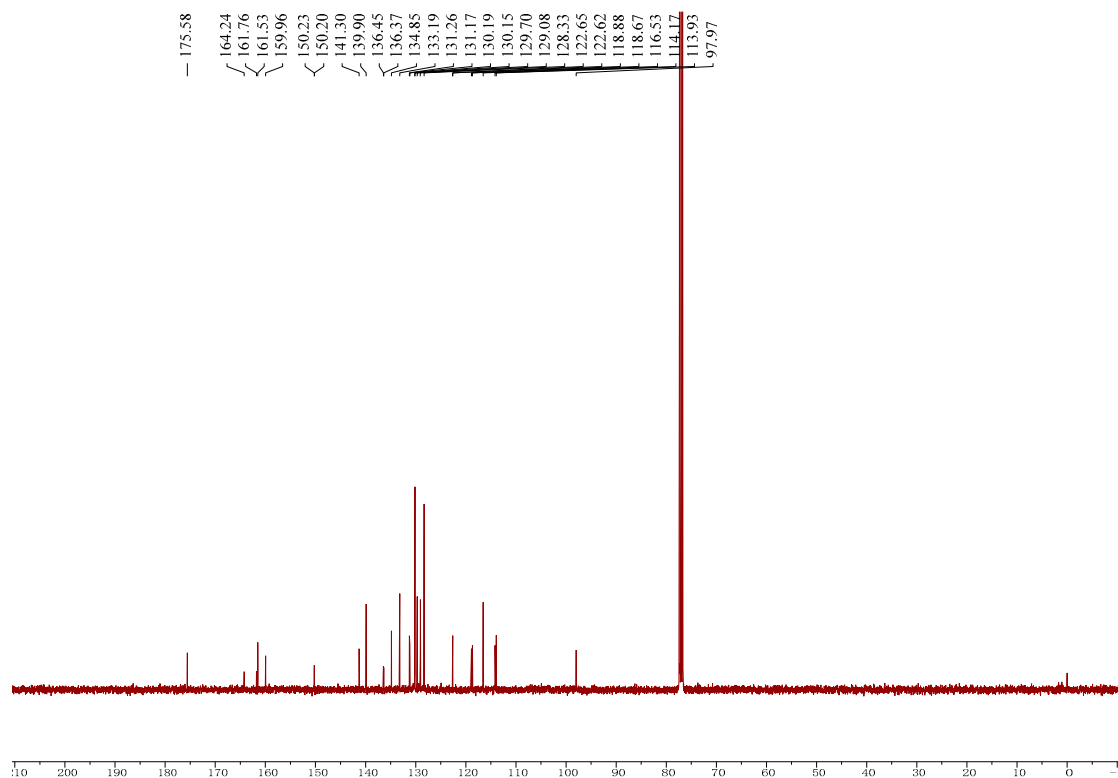

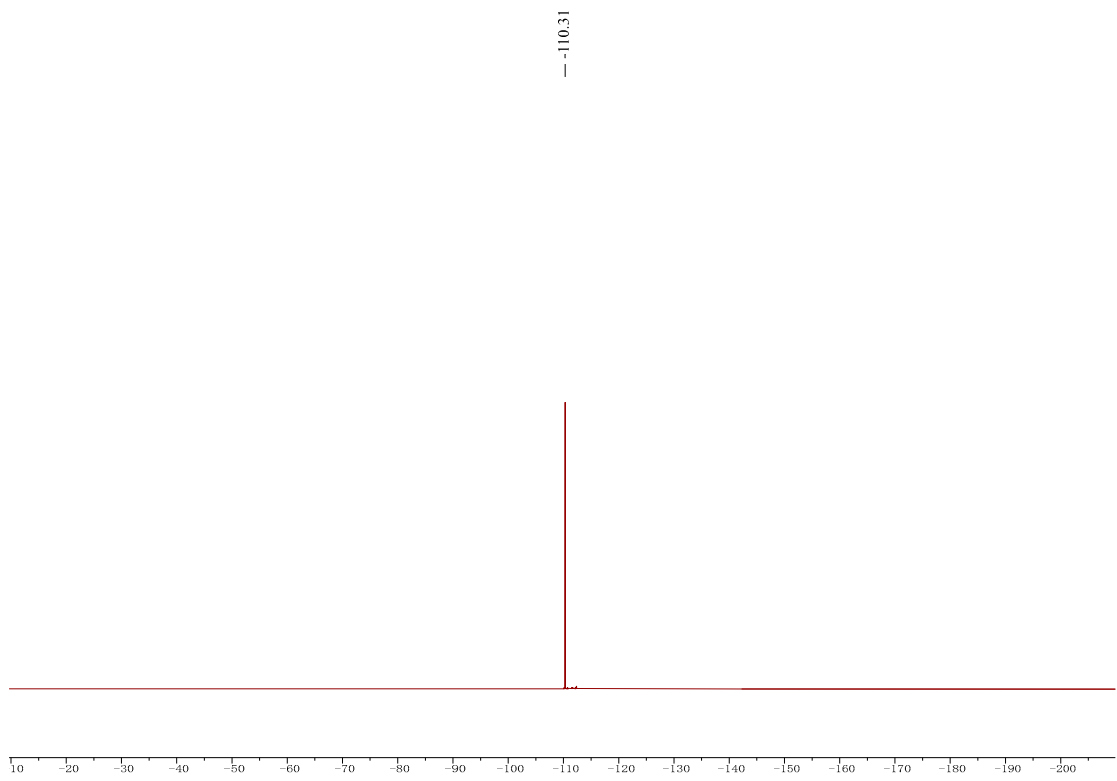



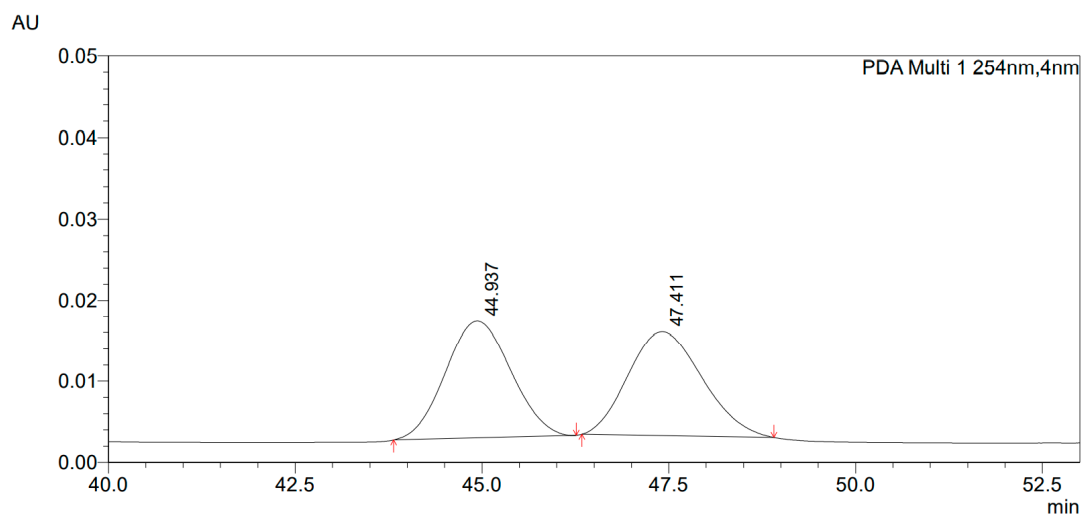

| PDA Ch1 254nm |           |         |        |         |
|---------------|-----------|---------|--------|---------|
| Peak#         | Ret. Time | Area    | Height | Area%   |
| 1             | 44.937    | 875684  | 14385  | 49.877  |
| 2             | 47.411    | 880004  | 12797  | 50.123  |
| Total         |           | 1755689 | 27183  | 100.000 |

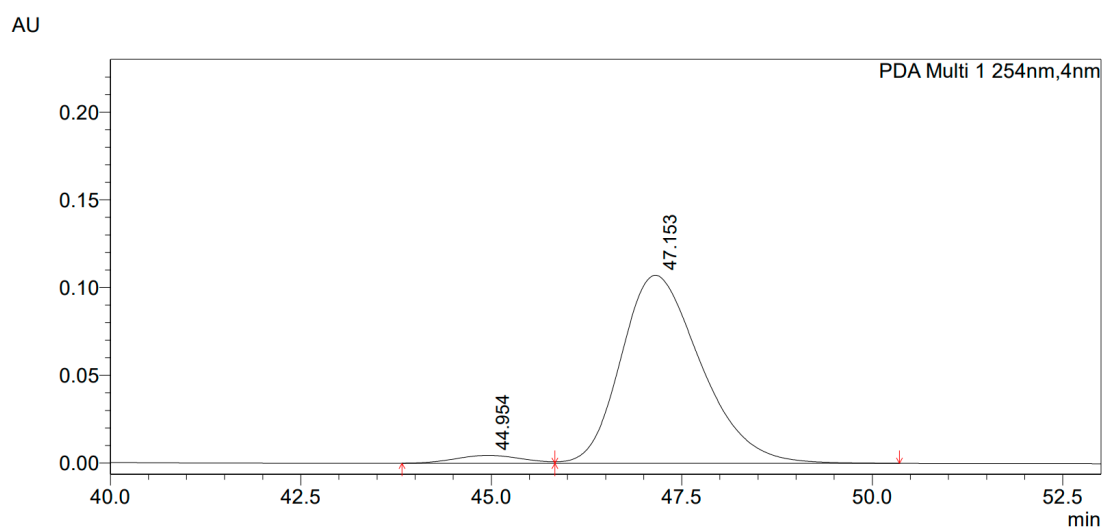

| PDA Ch1 254nm |           |         |        |         |
|---------------|-----------|---------|--------|---------|
| Peak#         | Ret. Time | Area    | Height | Area%   |
| 1             | 44.954    | 273102  | 4498   | 3.373   |
| 2             | 47.153    | 7823978 | 107175 | 96.627  |
| Total         |           | 8097080 | 111673 | 100.000 |

**(Z)-N-(3-(2-iodophenyl)-4-oxo-6-(*o*-tolyl)-3,4-dihydro-2H-1,3-thiazin-2-ylidene)benzamide  
(3j)**

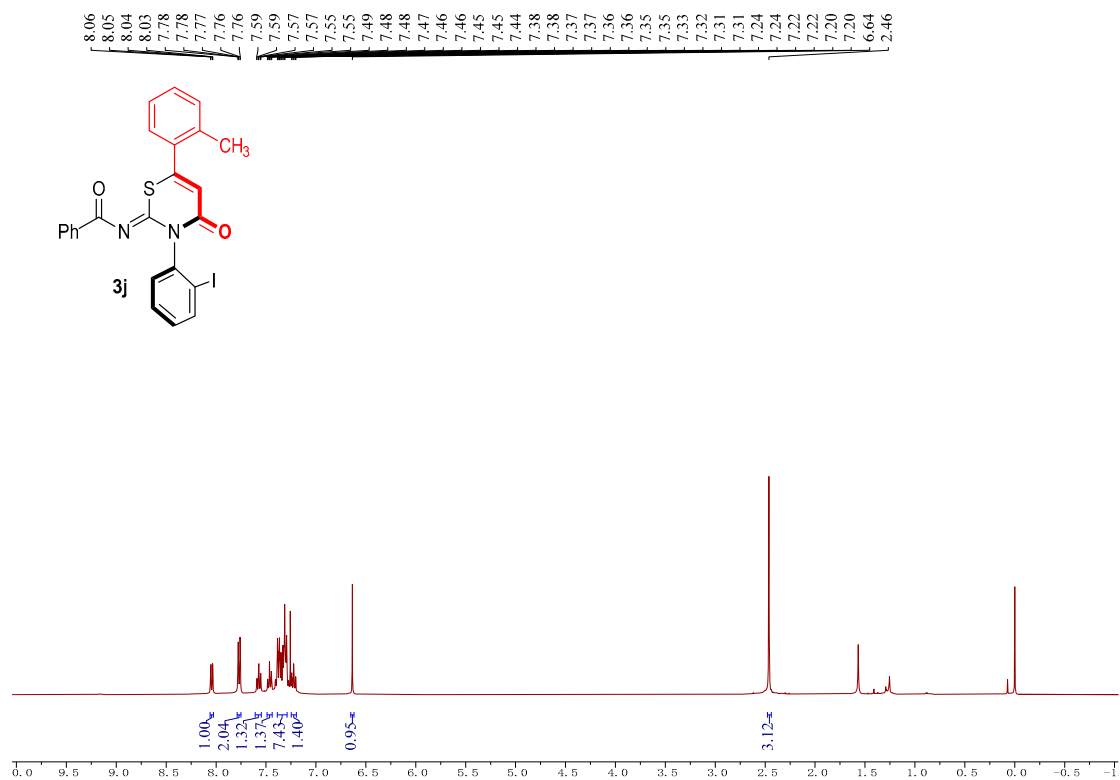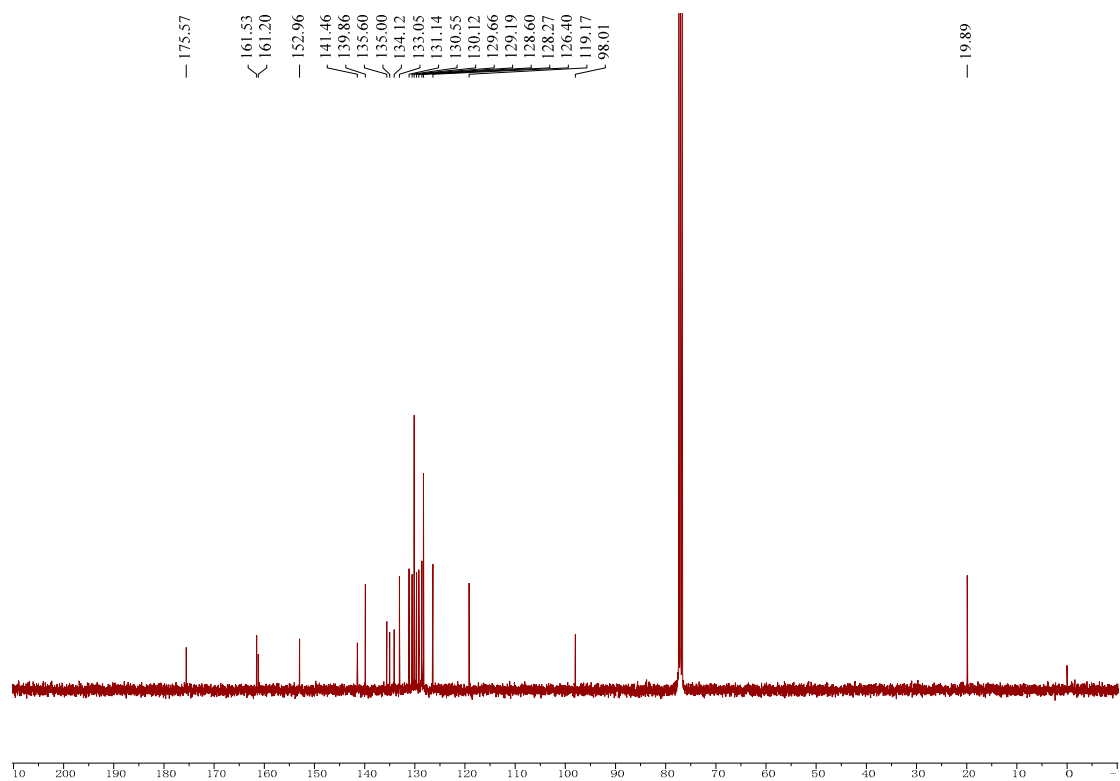

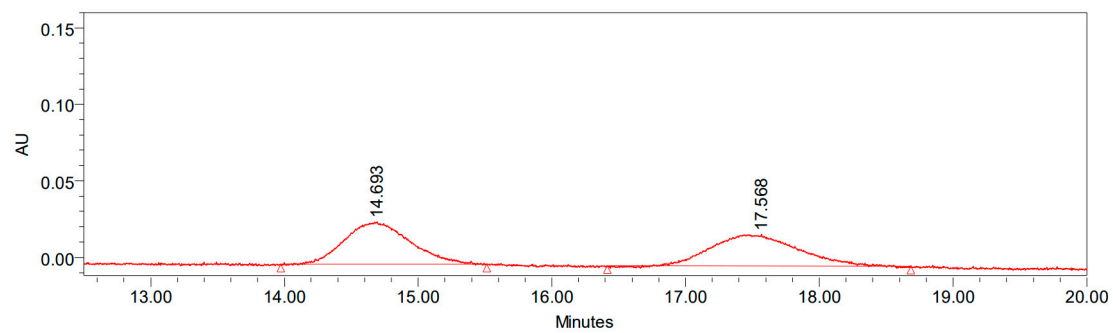

|   | RT     | Area   | % Area | Height |
|---|--------|--------|--------|--------|
| 1 | 14.693 | 943802 | 50.22  | 27800  |
| 2 | 17.568 | 935373 | 49.78  | 20405  |

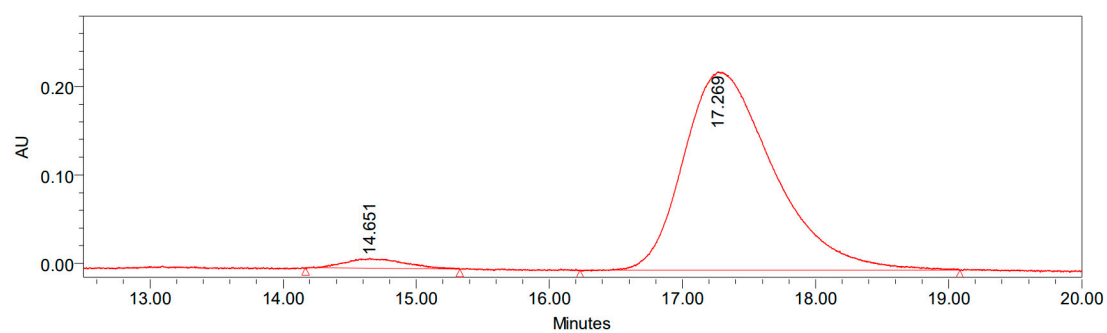

|   | RT     | Area     | % Area | Height |
|---|--------|----------|--------|--------|
| 1 | 14.651 | 331344   | 3.05   | 11039  |
| 2 | 17.269 | 10543287 | 96.95  | 224576 |

**(Z)-N-(6-(2-fluorophenyl)-3-(2-iodophenyl)-4-oxo-3,4-dihydro-2H-1,3-thiazin-2-ylidene)benzamide (3k)**

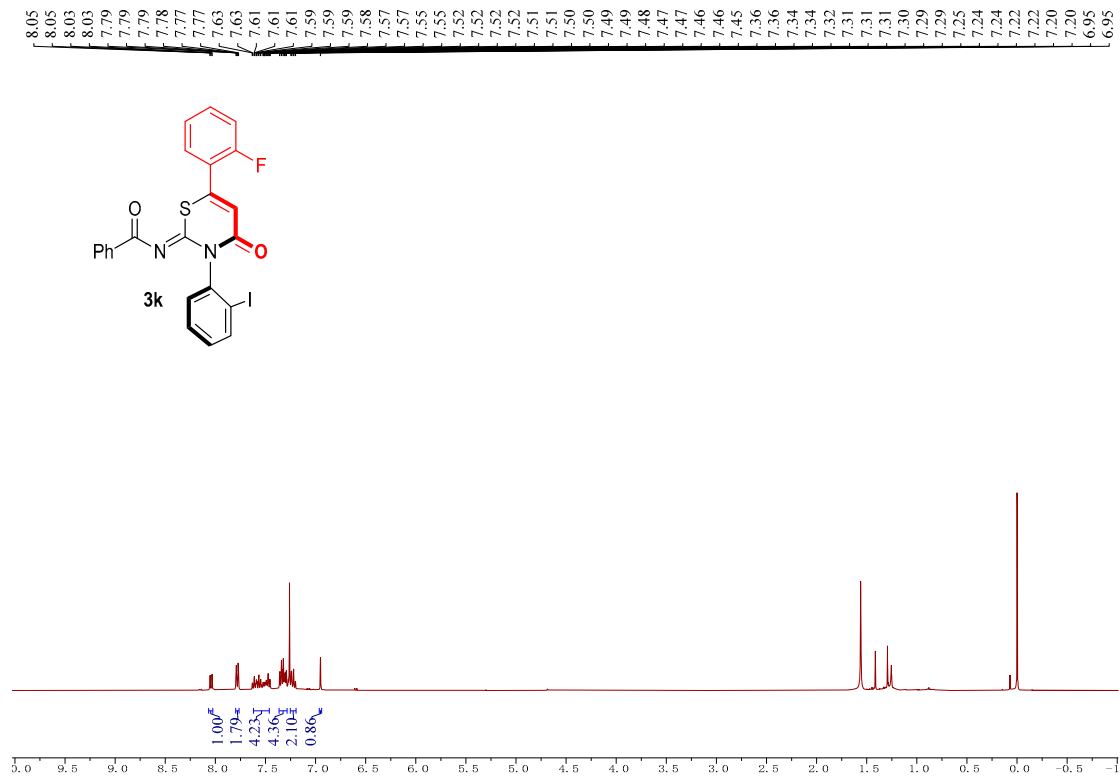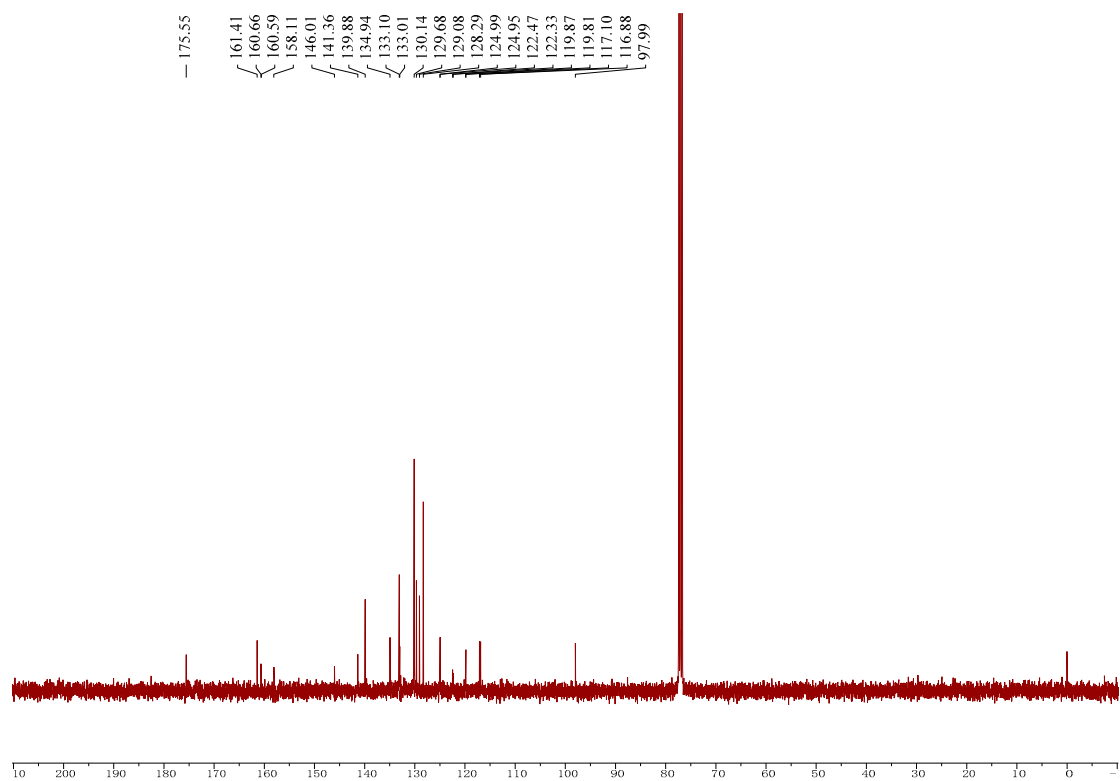

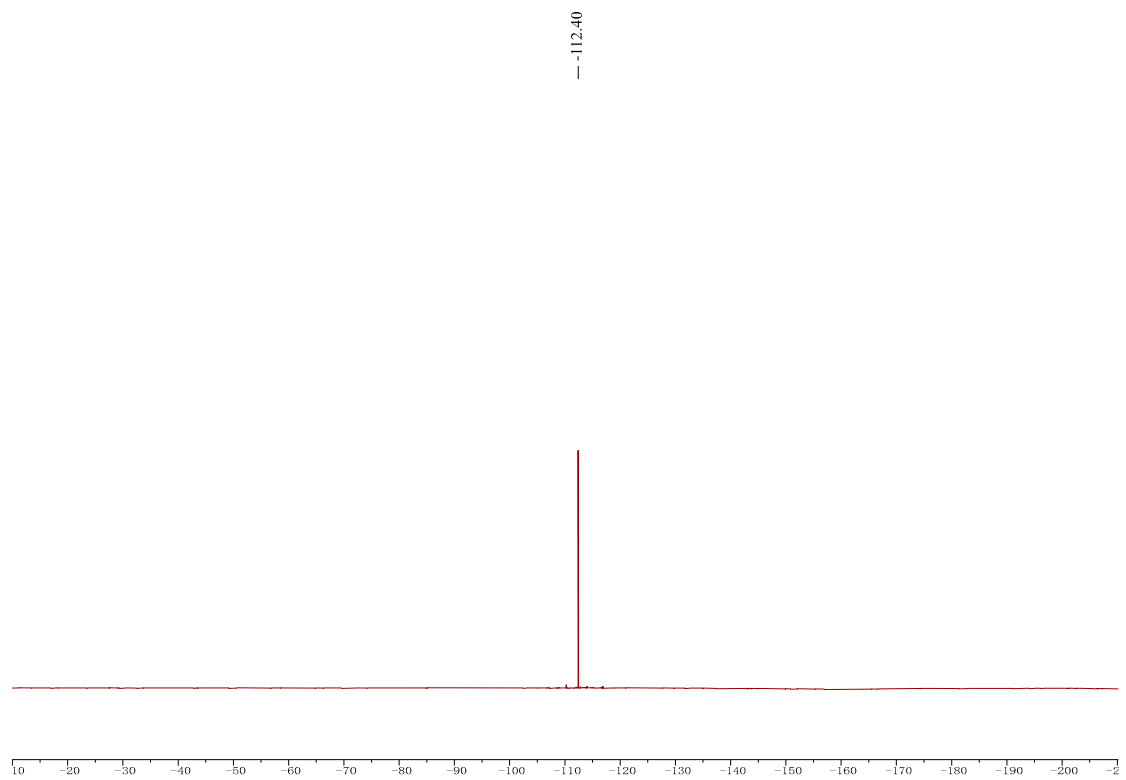

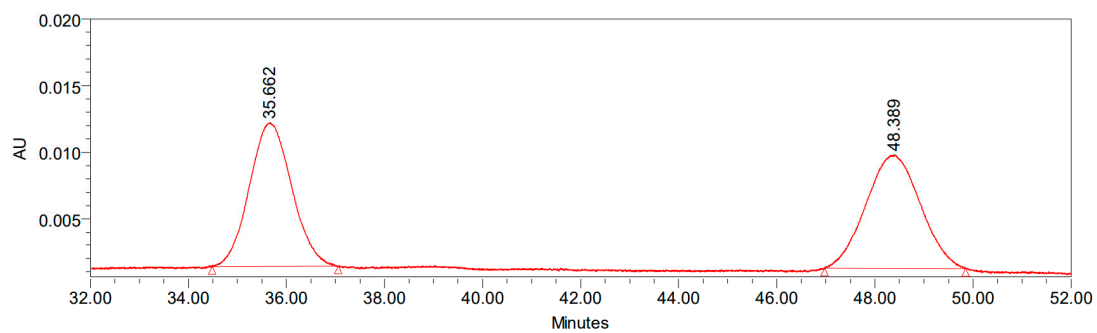

|   | RT     | Area   | % Area | Height |
|---|--------|--------|--------|--------|
| 1 | 35.662 | 649872 | 49.65  | 10812  |
| 2 | 48.389 | 659095 | 50.35  | 8572   |

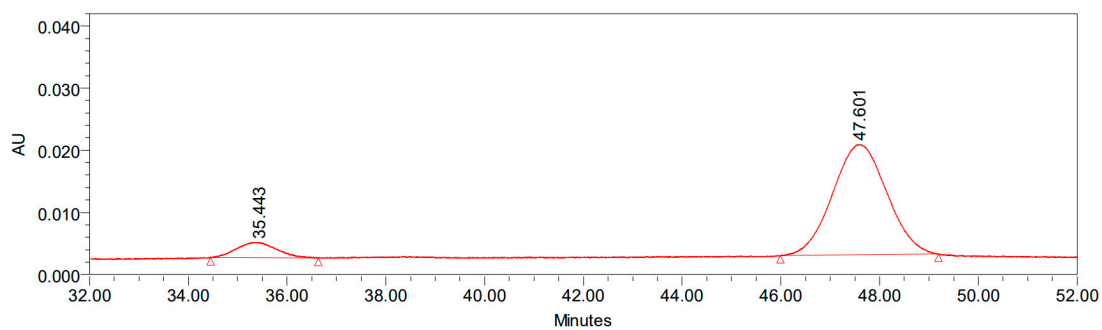

|   | RT     | Area    | % Area | Height |
|---|--------|---------|--------|--------|
| 1 | 35.443 | 135765  | 9.11   | 2437   |
| 2 | 47.601 | 1354225 | 90.89  | 17727  |

**(Z)-N-(6-(2-chlorophenyl)-3-(2-iodophenyl)-4-oxo-3,4-dihydro-2H-1,3-thiazin-2-ylidene)benzamide (3I)**

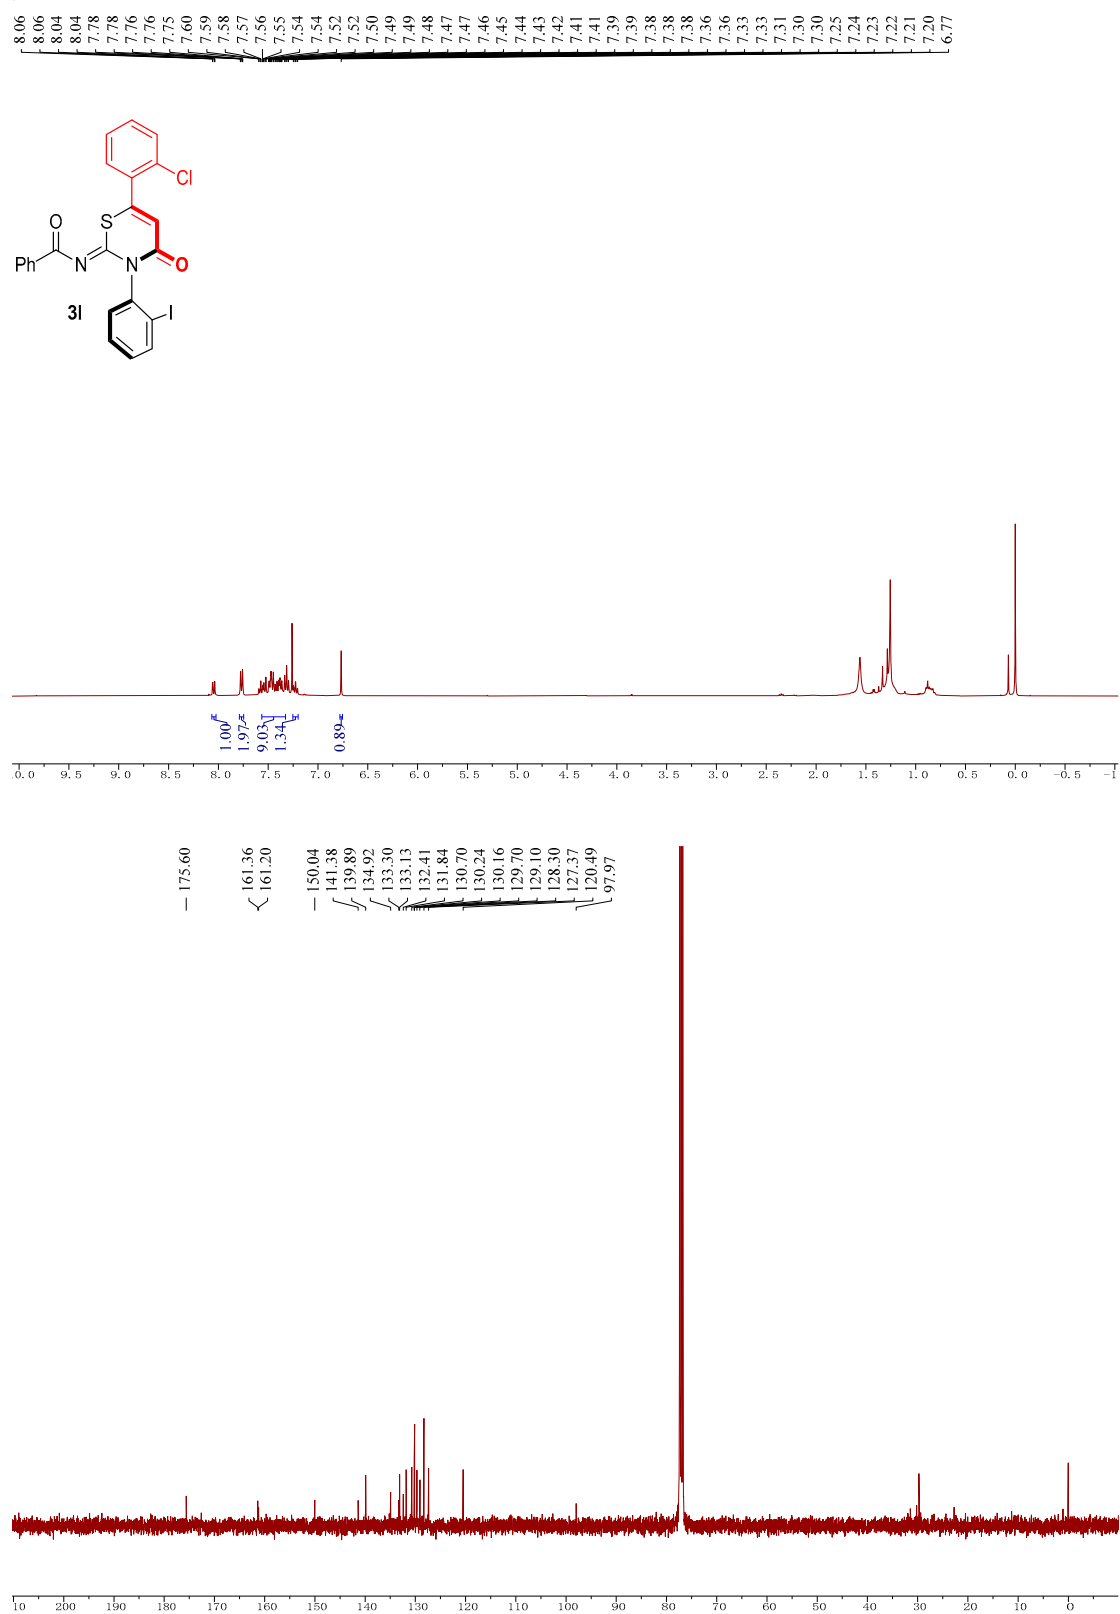

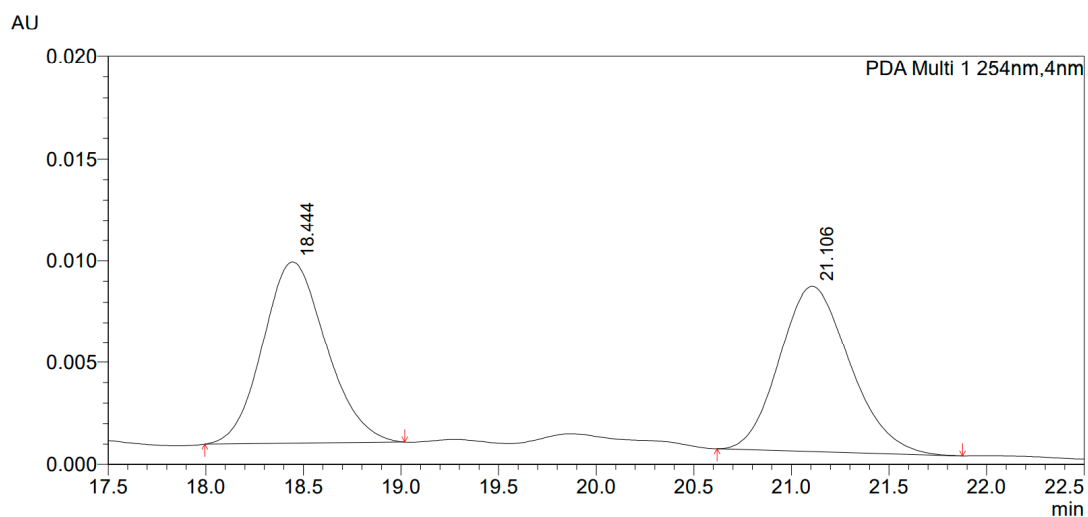

PDA Ch1 254nm

| Peak# | Ret. Time | Area   | Height | Area%   |
|-------|-----------|--------|--------|---------|
| 1     | 18.444    | 201532 | 8909   | 49.712  |
| 2     | 21.106    | 203863 | 8123   | 50.288  |
| Total |           | 405395 | 17031  | 100.000 |

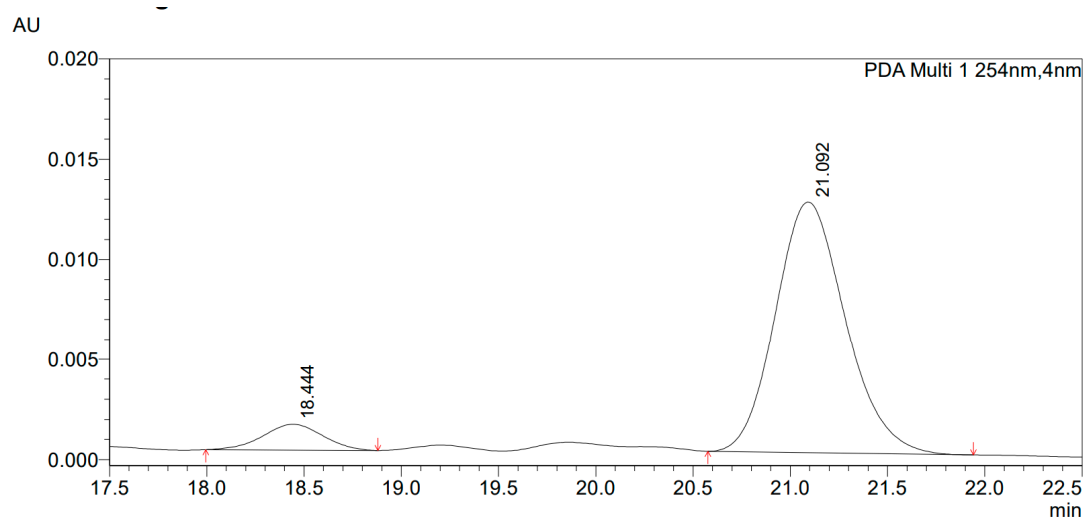

PDA Ch1 254nm

| Peak# | Ret. Time | Area   | Height | Area%   |
|-------|-----------|--------|--------|---------|
| 1     | 18.444    | 27290  | 1277   | 8.012   |
| 2     | 21.092    | 313350 | 12517  | 91.988  |
| Total |           | 340640 | 13794  | 100.000 |



**(Z)-N-(3-(2-iodophenyl)-6-(naphthalen-1-yl)-4-oxo-3,4-dihydro-2H-1,3-thiazin-2-ylidene)benzamide (3m)**

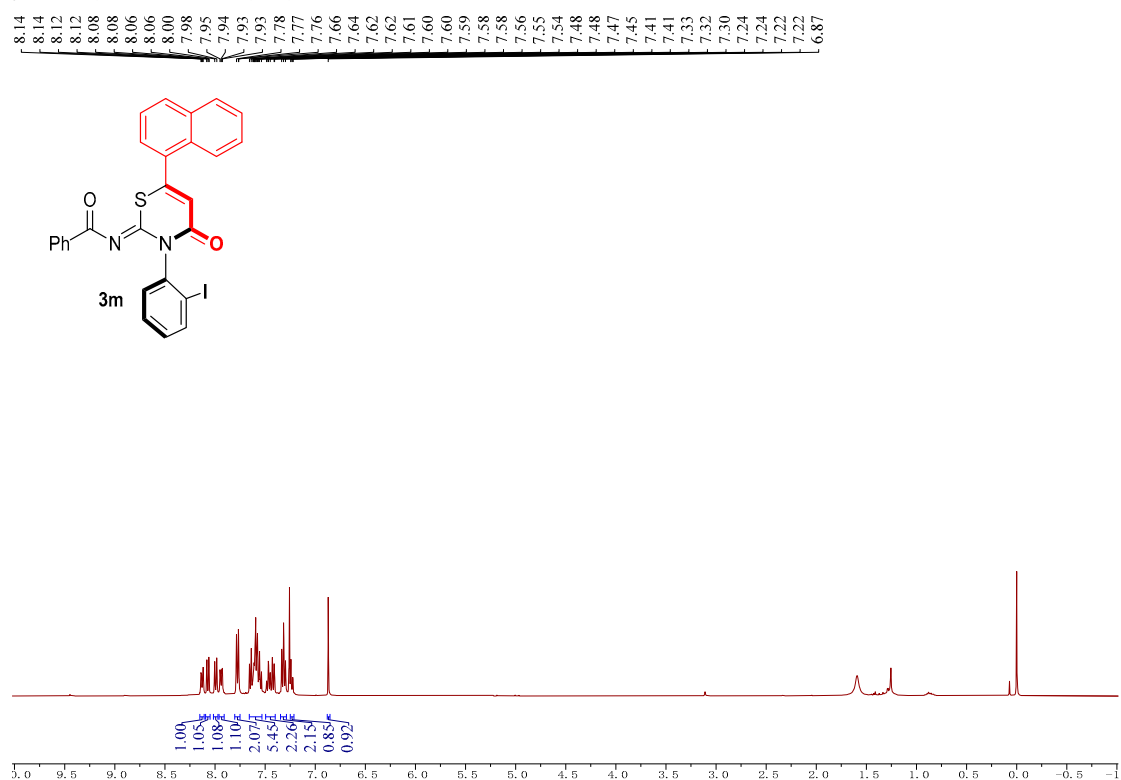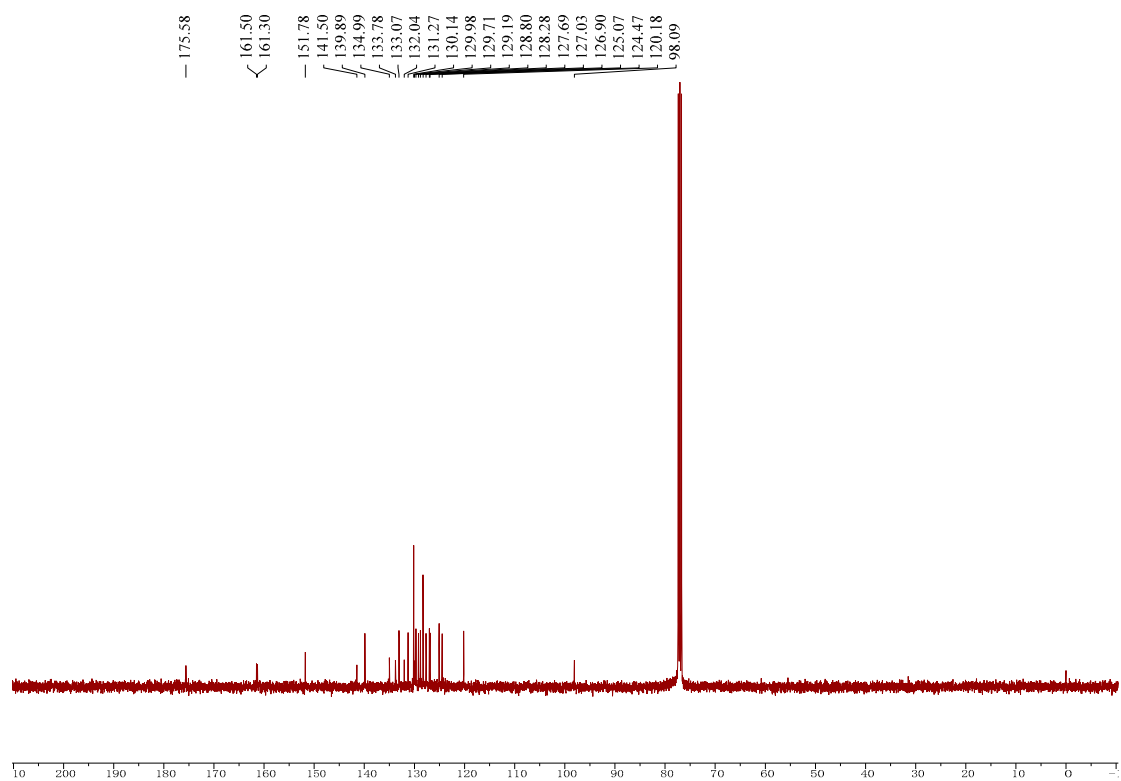

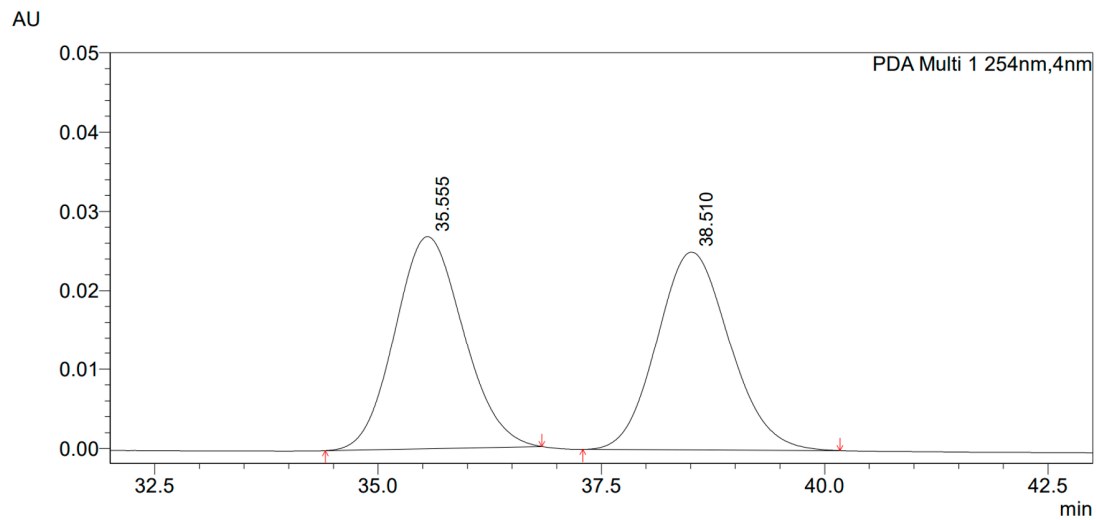

| PDA Ch1 254nm |           |         |        |         |
|---------------|-----------|---------|--------|---------|
| Peak#         | Ret. Time | Area    | Height | Area%   |
| 1             | 35.555    | 1433013 | 26833  | 50.256  |
| 2             | 38.510    | 1418423 | 25042  | 49.744  |
| Total         |           | 2851436 | 51875  | 100.000 |

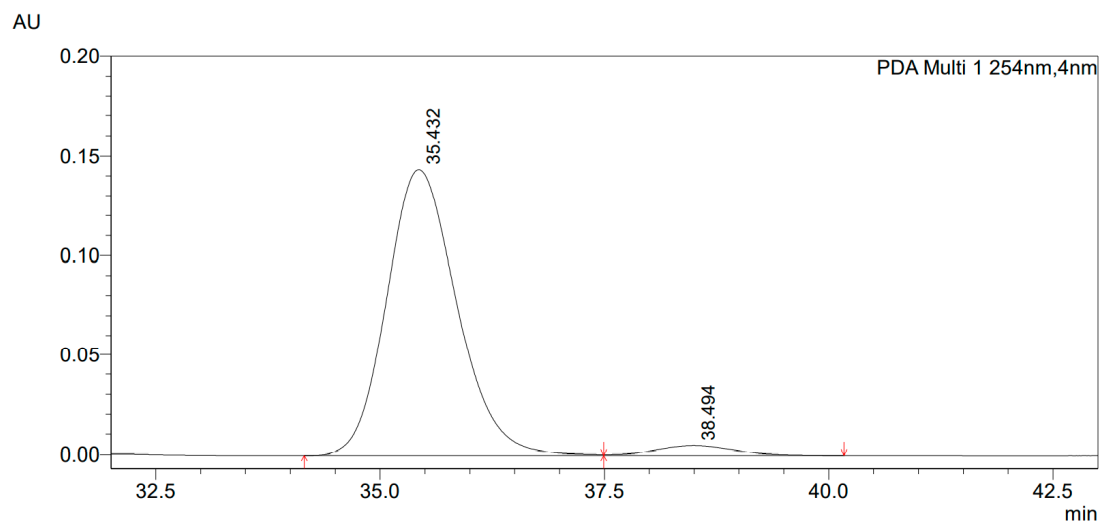

| PDA Ch1 254nm |           |         |        |         |
|---------------|-----------|---------|--------|---------|
| Peak#         | Ret. Time | Area    | Height | Area%   |
| 1             | 35.432    | 7777142 | 143595 | 96.529  |
| 2             | 38.494    | 279612  | 4602   | 3.471   |
| Total         |           | 8056754 | 148197 | 100.000 |

**(Z)-N-(3-(2-iodophenyl)-4-oxo-6-(thiophen-2-yl)-3,4-dihydro-2H-1,3-thiazin-2-ylidene)benzamide (3n)**

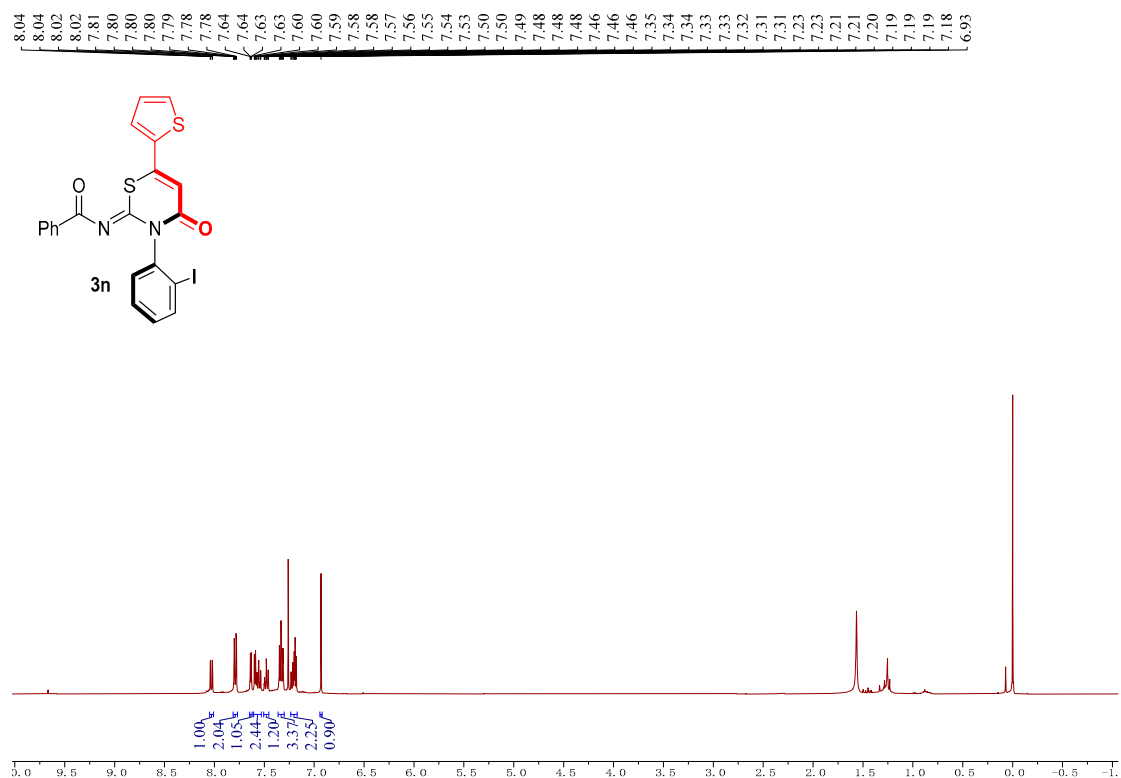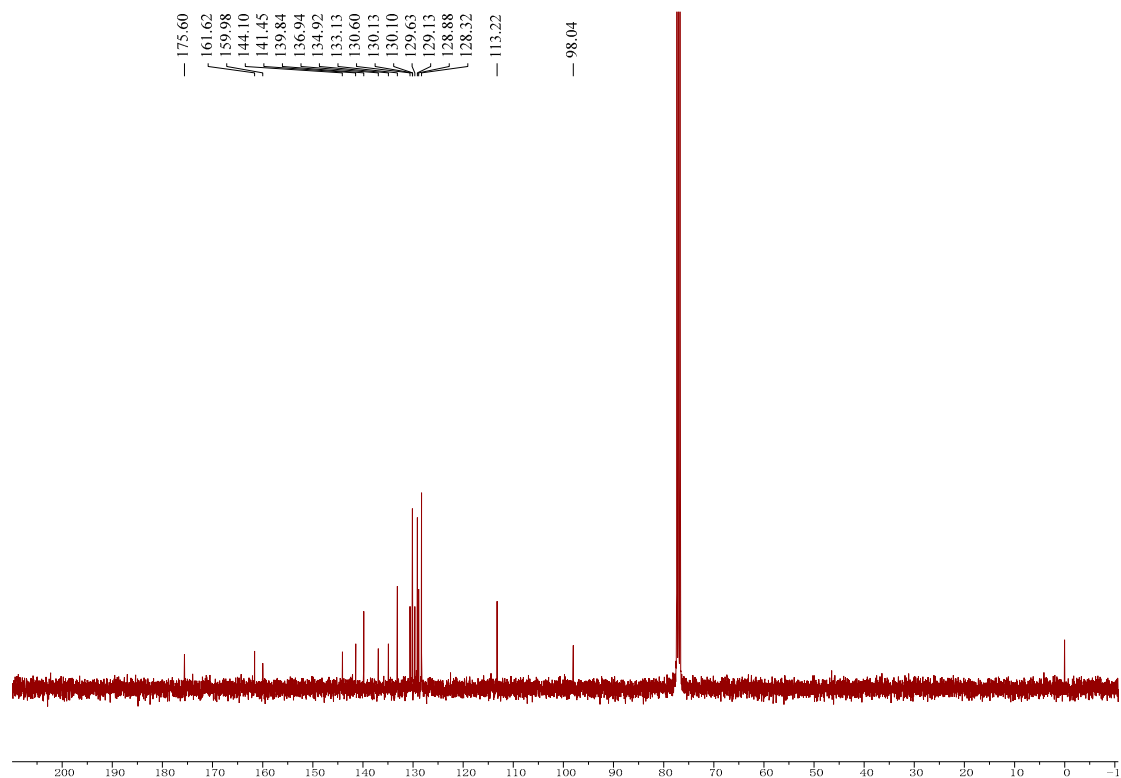

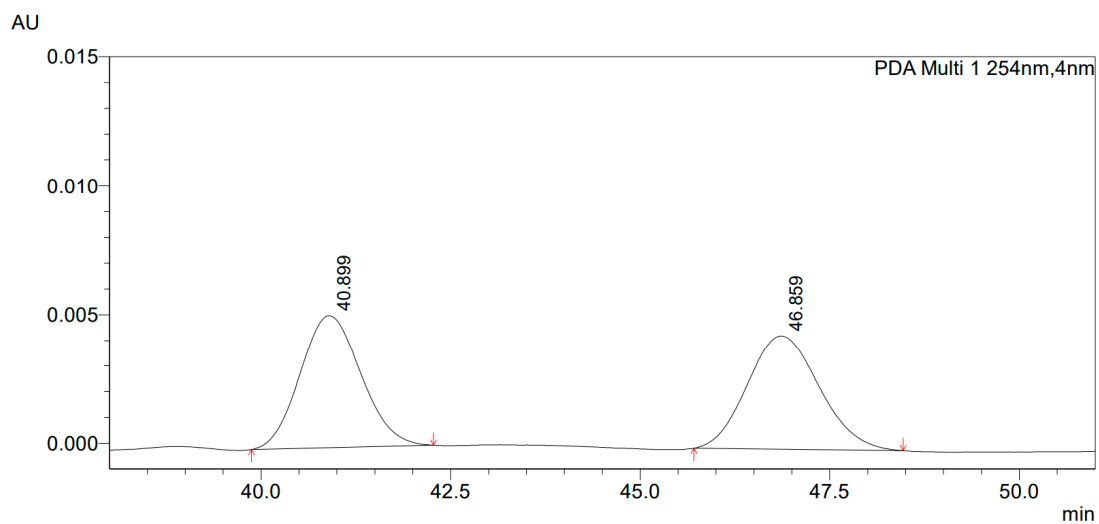

PDA Ch1 254nm

| Peak# | Ret. Time | Area   | Height | Area%   |
|-------|-----------|--------|--------|---------|
| 1     | 40.899    | 285959 | 5142   | 49.578  |
| 2     | 46.859    | 290829 | 4414   | 50.422  |
| Total |           | 576788 | 9556   | 100.000 |

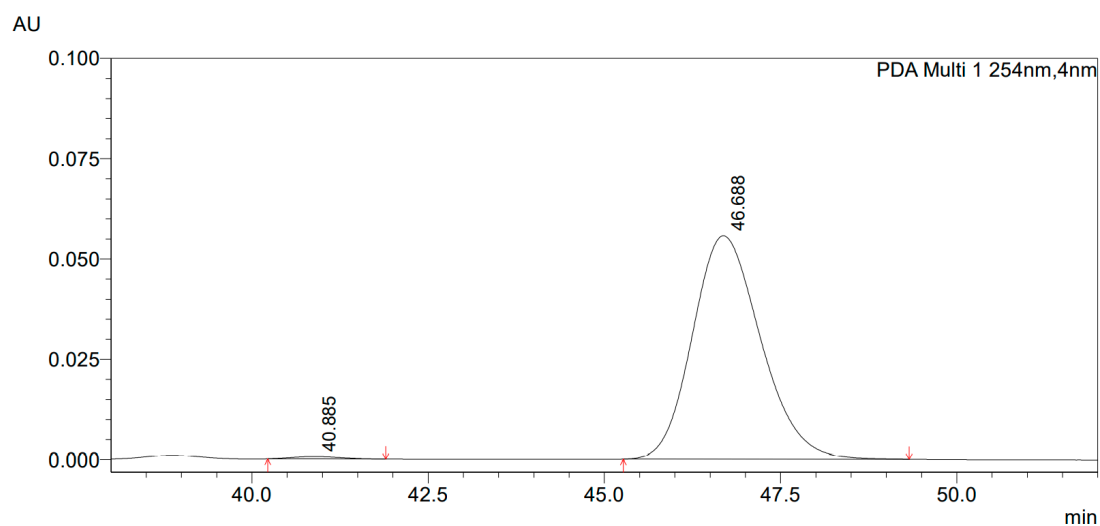

PDA Ch1 254nm

| Peak# | Ret. Time | Area    | Height | Area%   |
|-------|-----------|---------|--------|---------|
| 1     | 40.885    | 29445   | 603    | 0.779   |
| 2     | 46.688    | 3752783 | 55674  | 99.221  |
| Total |           | 3782228 | 56277  | 100.000 |

**(Z)-N-(3-(2-iodophenyl)-4-oxo-6-phenyl-3,4-dihydro-2H-1,3-thiazin-2-ylidene)-4-methylbenzamide (4a)**

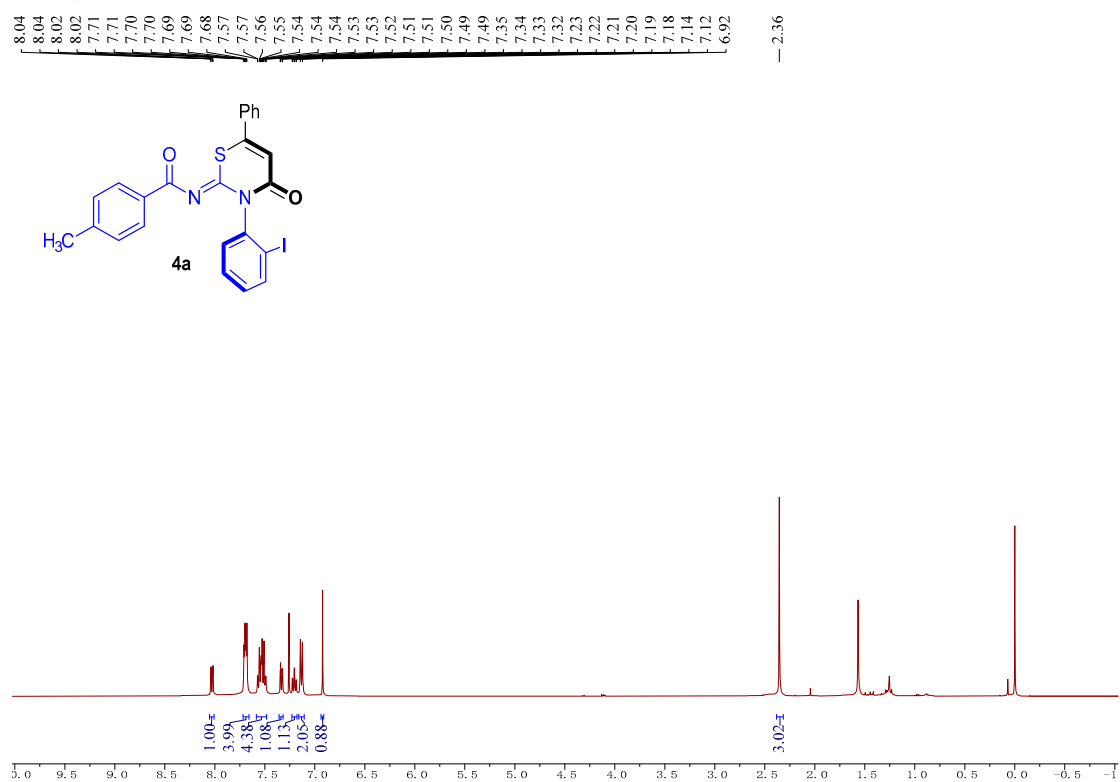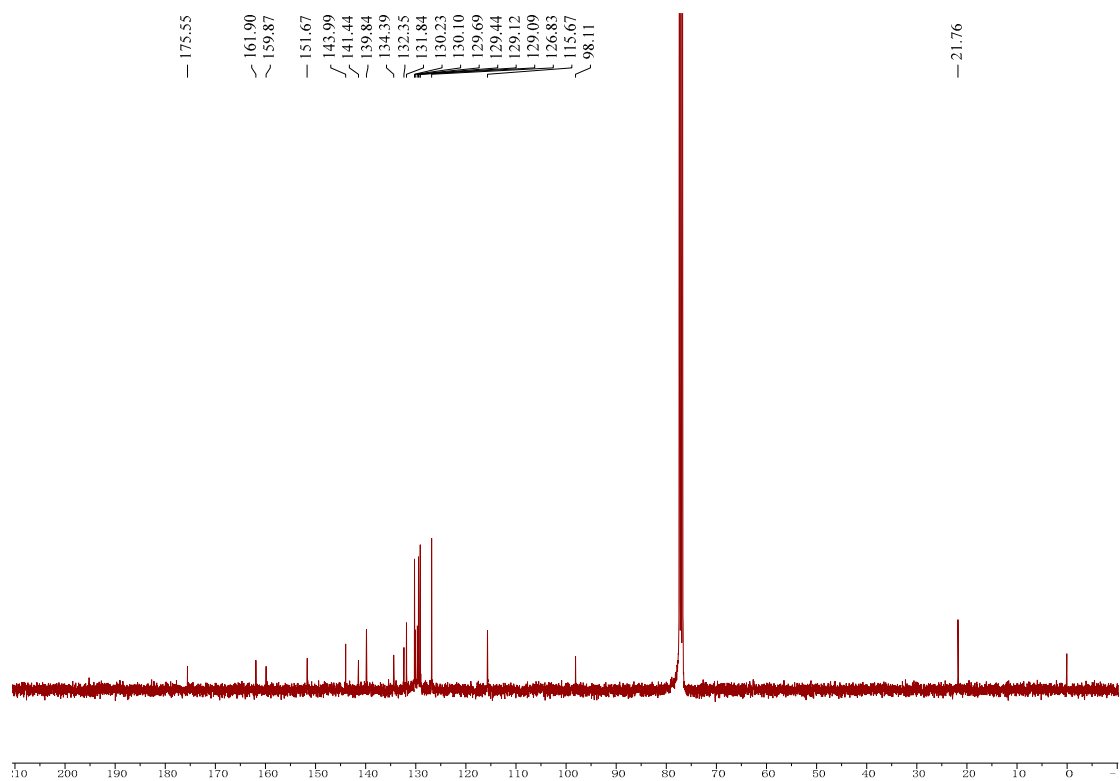

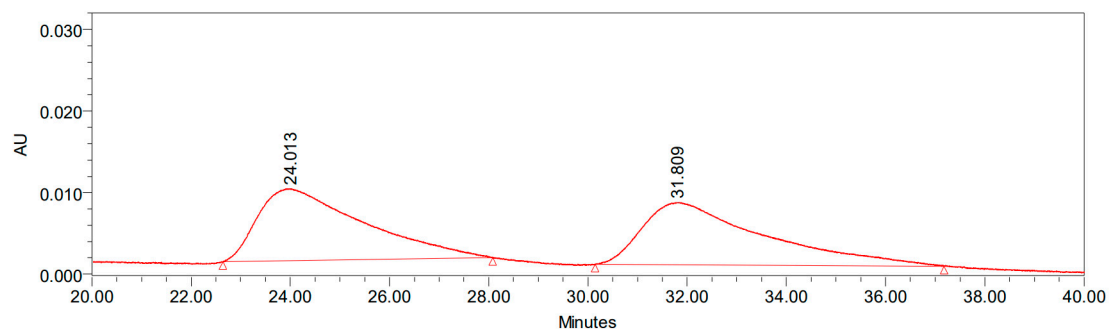

|   | RT     | Area    | % Area | Height |
|---|--------|---------|--------|--------|
| 1 | 24.013 | 1301574 | 50.19  | 8822   |
| 2 | 31.809 | 1291545 | 49.81  | 7629   |

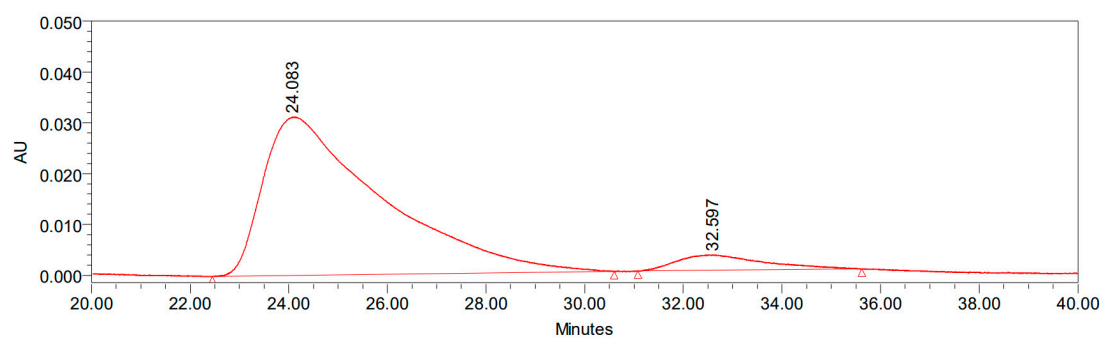

|   | RT     | Area    | % Area | Height |
|---|--------|---------|--------|--------|
| 1 | 24.083 | 5177727 | 93.38  | 31130  |
| 2 | 32.597 | 366936  | 6.62   | 3016   |

**(Z)-N-(3-(2-iodophenyl)-4-oxo-6-phenyl-3,4-dihydro-2H-1,3-thiazin-2-ylidene)-3-methylbenzamide (4b)**

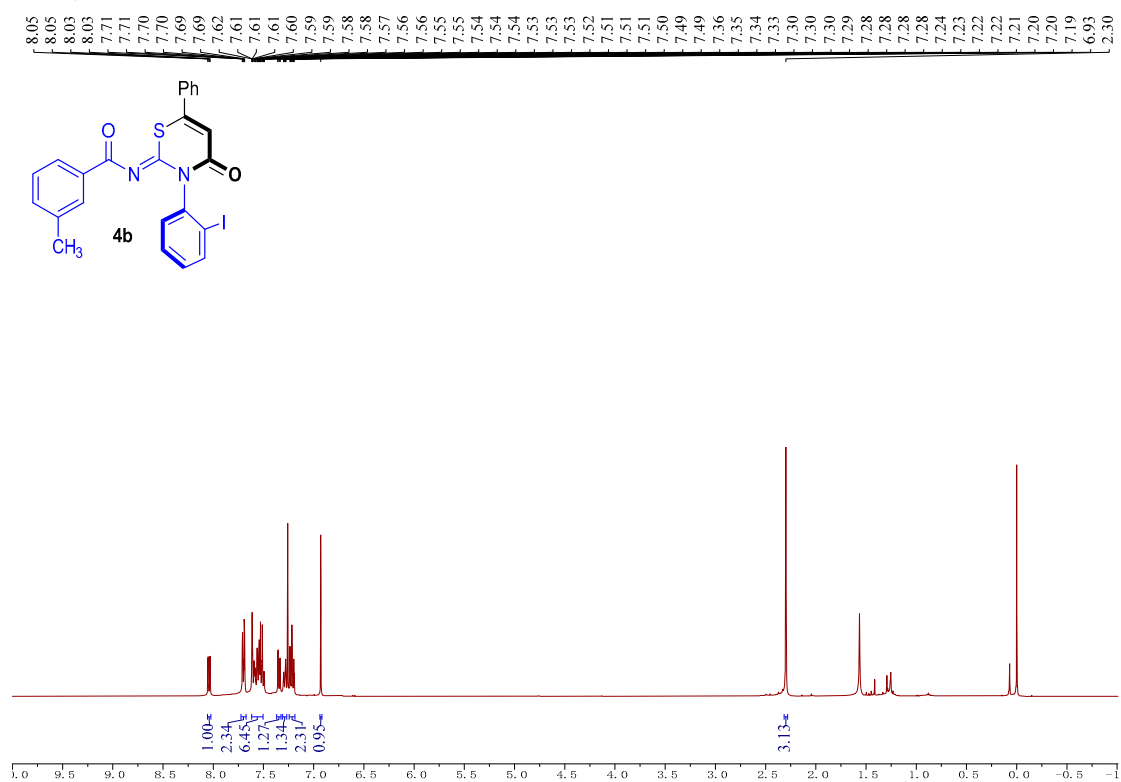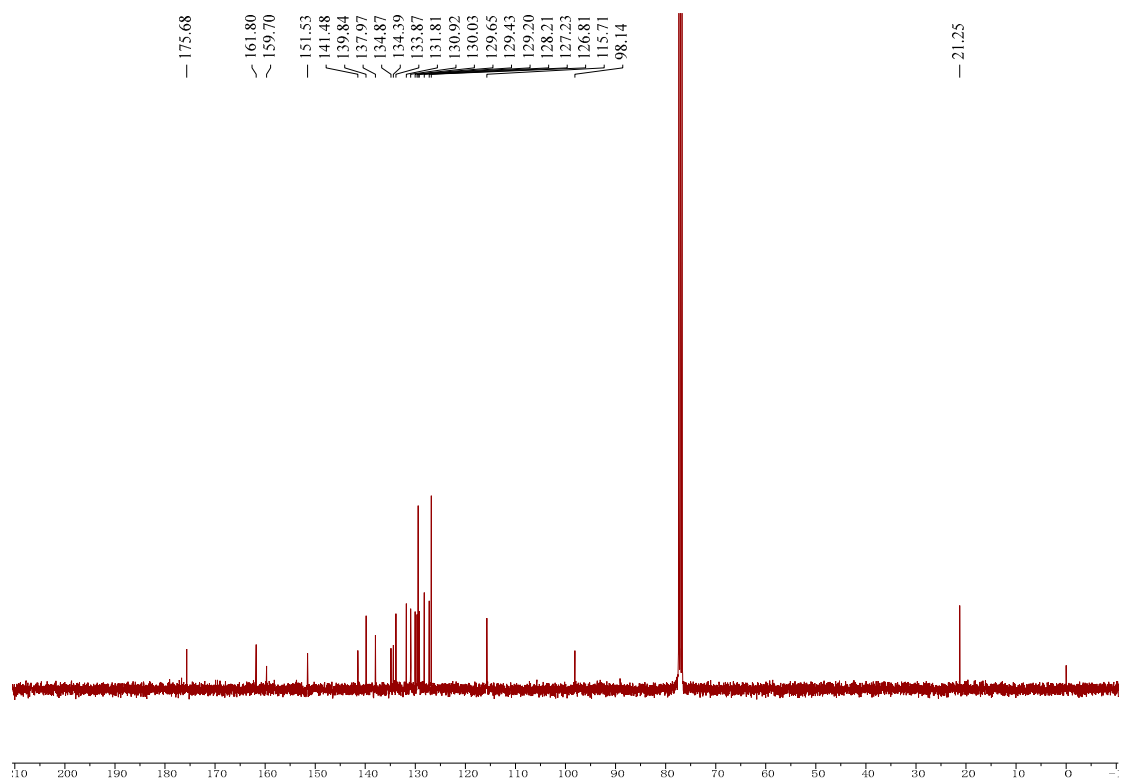

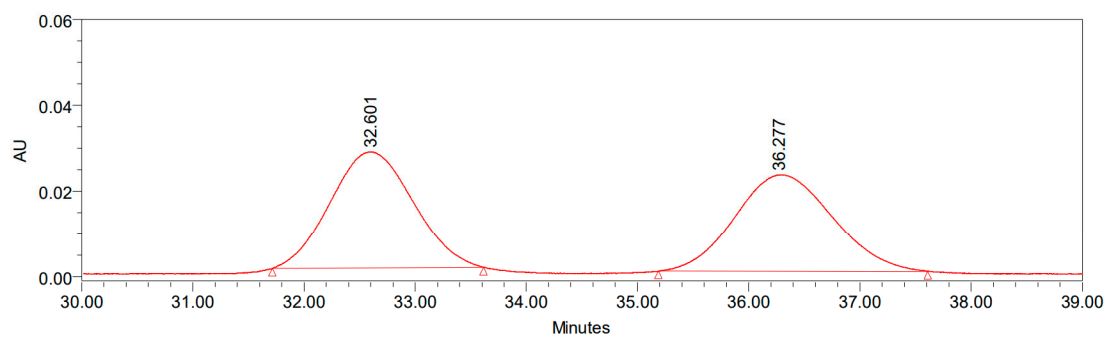

|   | RT     | Area    | % Area | Height |
|---|--------|---------|--------|--------|
| 1 | 32.601 | 1409449 | 50.46  | 27184  |
| 2 | 36.277 | 1383613 | 49.54  | 22640  |

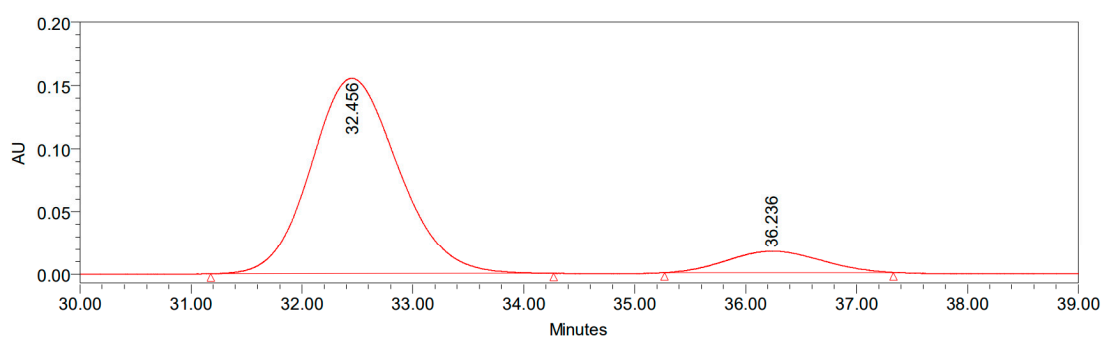

|   | RT     | Area    | % Area | Height |
|---|--------|---------|--------|--------|
| 1 | 32.456 | 8534103 | 89.63  | 155161 |
| 2 | 36.236 | 987617  | 10.37  | 16955  |



**(Z)-N-(3-(2-iodophenyl)-4-oxo-6-phenyl-3,4-dihydro-2H-1,3-thiazin-2-ylidene)-3-methoxybenzamide (4c)**

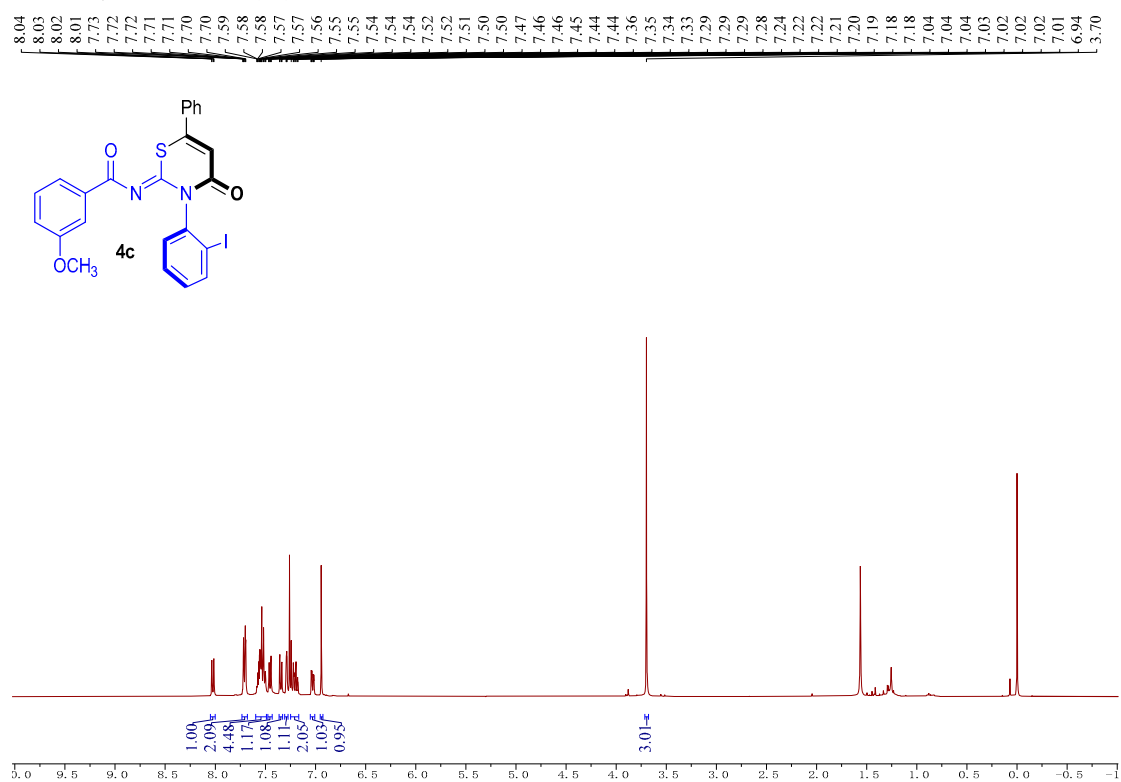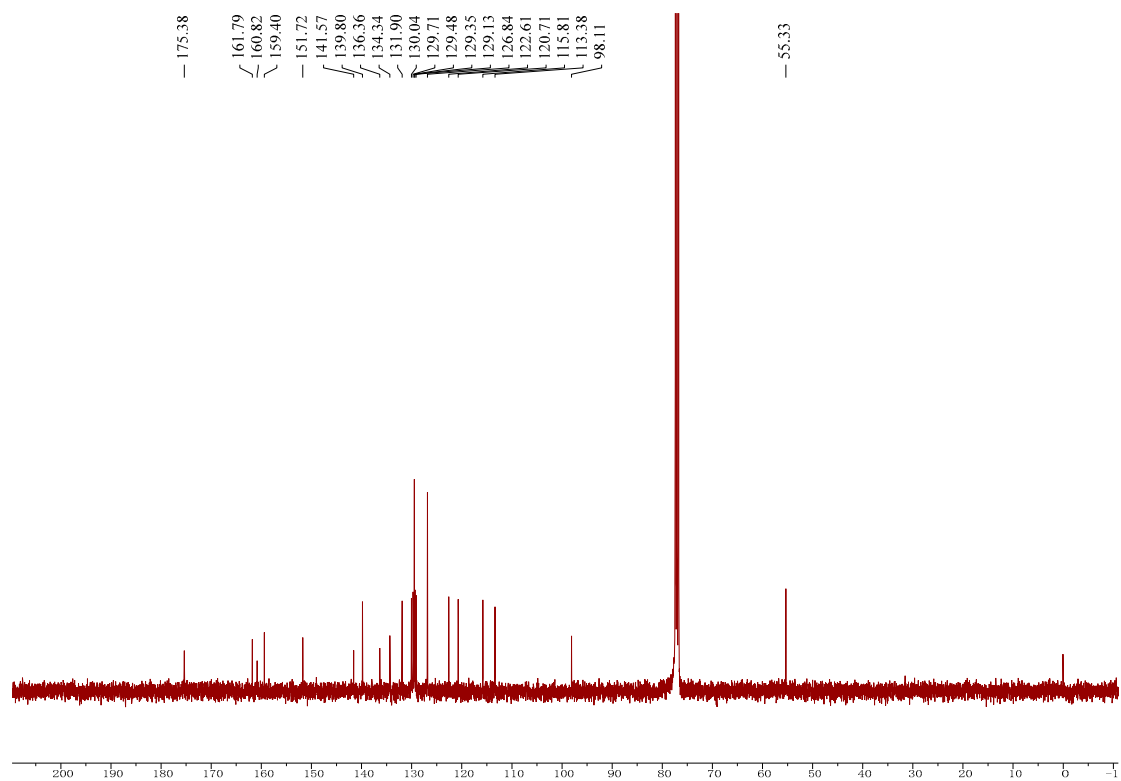

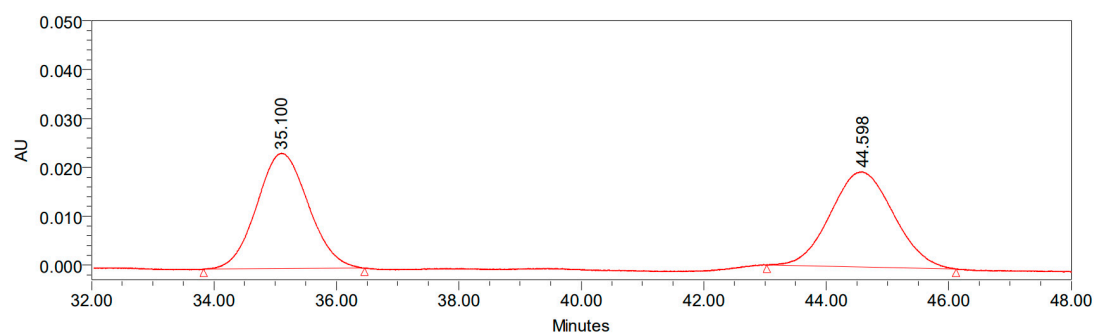

|   | RT     | Area    | % Area | Height |
|---|--------|---------|--------|--------|
| 1 | 35.100 | 1377033 | 49.72  | 23569  |
| 2 | 44.598 | 1392423 | 50.28  | 19453  |

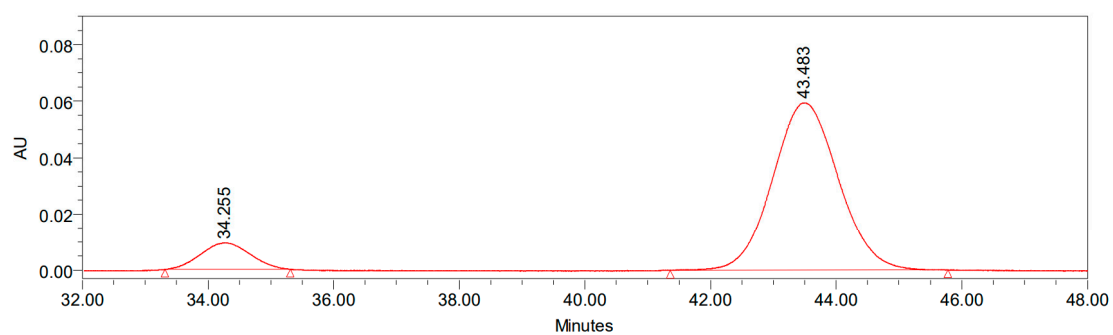

|   | RT     | Area    | % Area | Height |
|---|--------|---------|--------|--------|
| 1 | 34.255 | 507302  | 10.47  | 9325   |
| 2 | 43.483 | 4339773 | 89.53  | 59447  |

**(Z)-N-(3-(2-iodophenyl)-4-oxo-6-phenyl-3,4-dihydro-2H-1,3-thiazin-2-ylidene)-2-methylbenzamide (4d)**

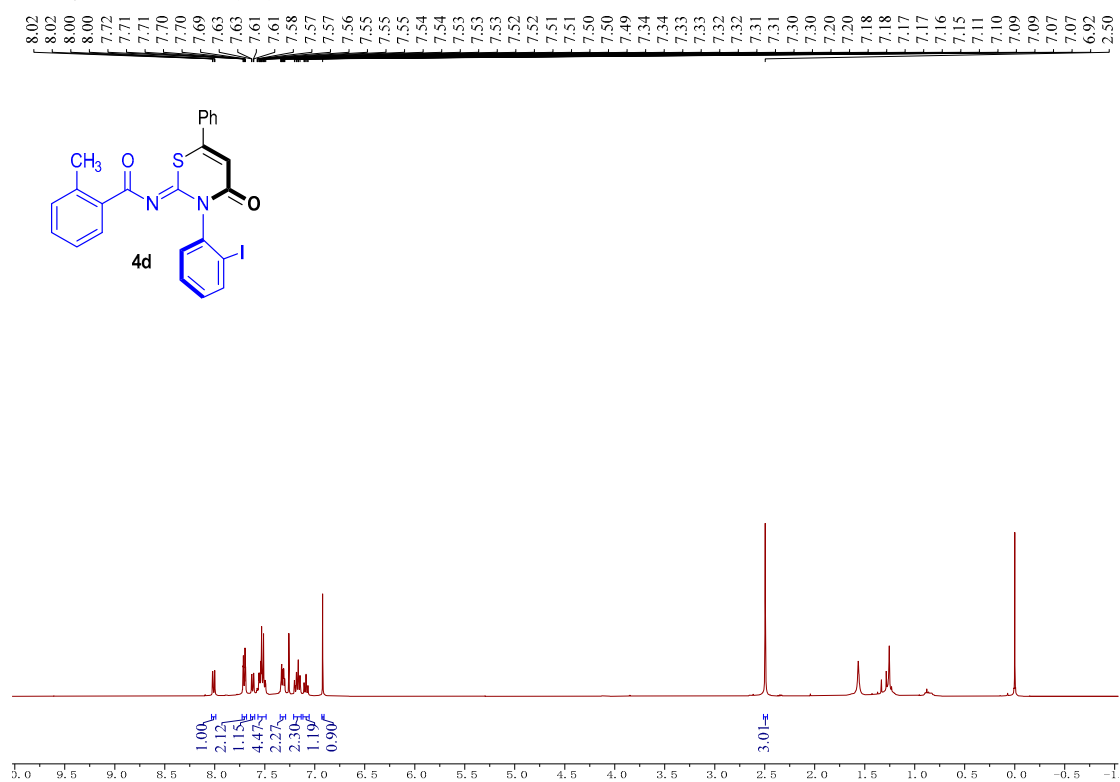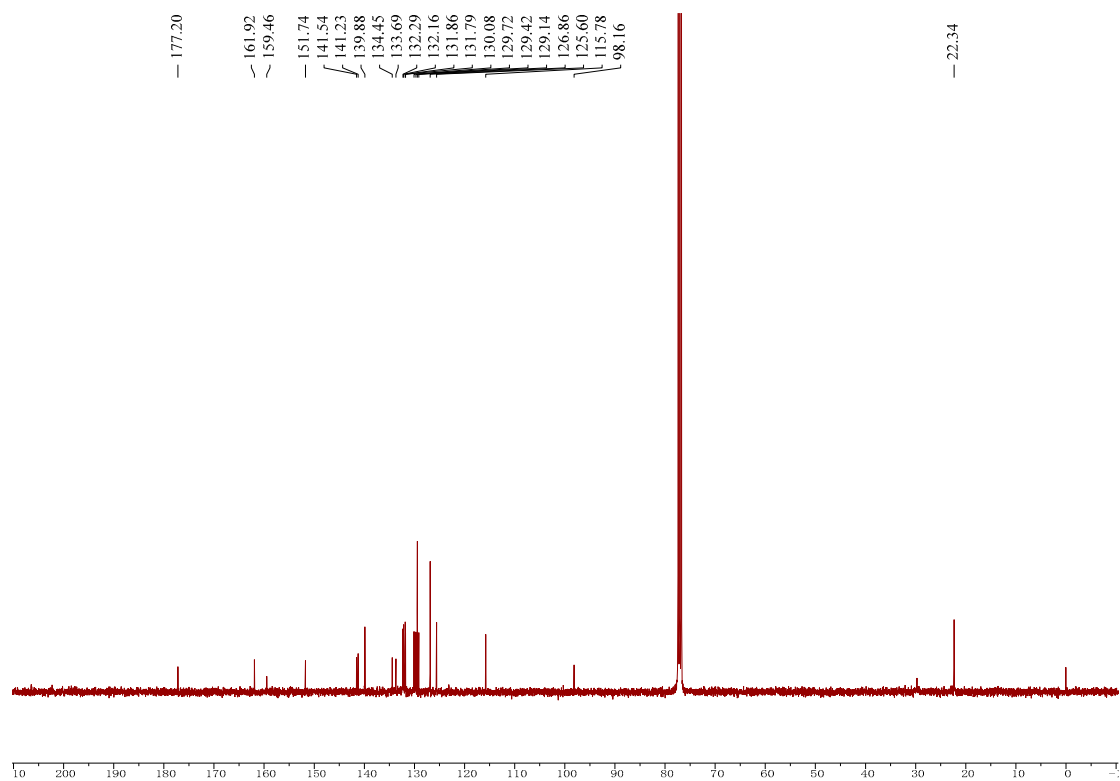

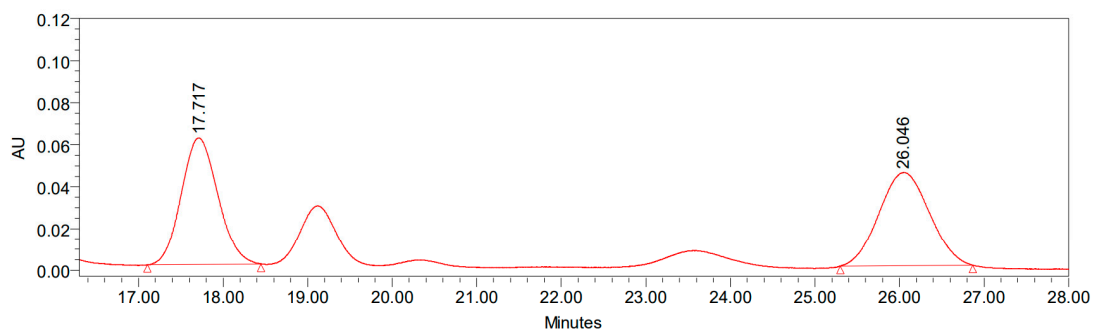

|   | RT     | Area    | % Area | Height |
|---|--------|---------|--------|--------|
| 1 | 17.717 | 1822561 | 49.64  | 60446  |
| 2 | 26.046 | 1848840 | 50.36  | 44635  |

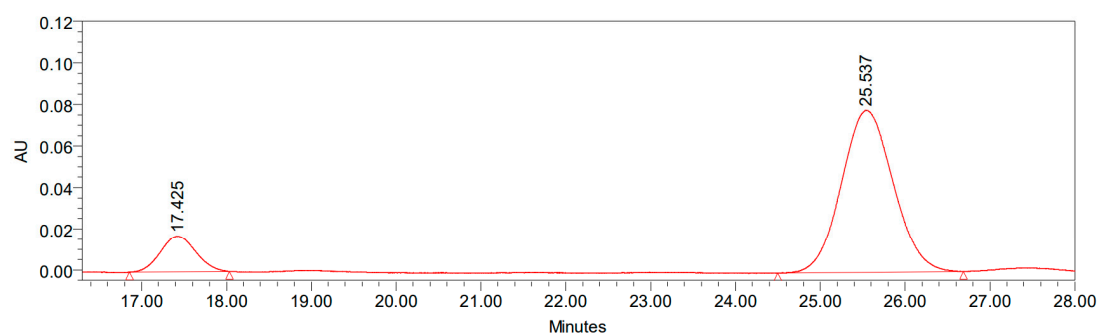

|   | RT     | Area    | % Area | Height |
|---|--------|---------|--------|--------|
| 1 | 17.425 | 498881  | 13.07  | 17238  |
| 2 | 25.537 | 3317518 | 86.93  | 78217  |

**(Z)-4-fluoro-N-(3-(2-iodophenyl)-4-oxo-6-phenyl-3,4-dihydro-2H-1,3-thiazin-2-ylidene)benzamide (4e)**

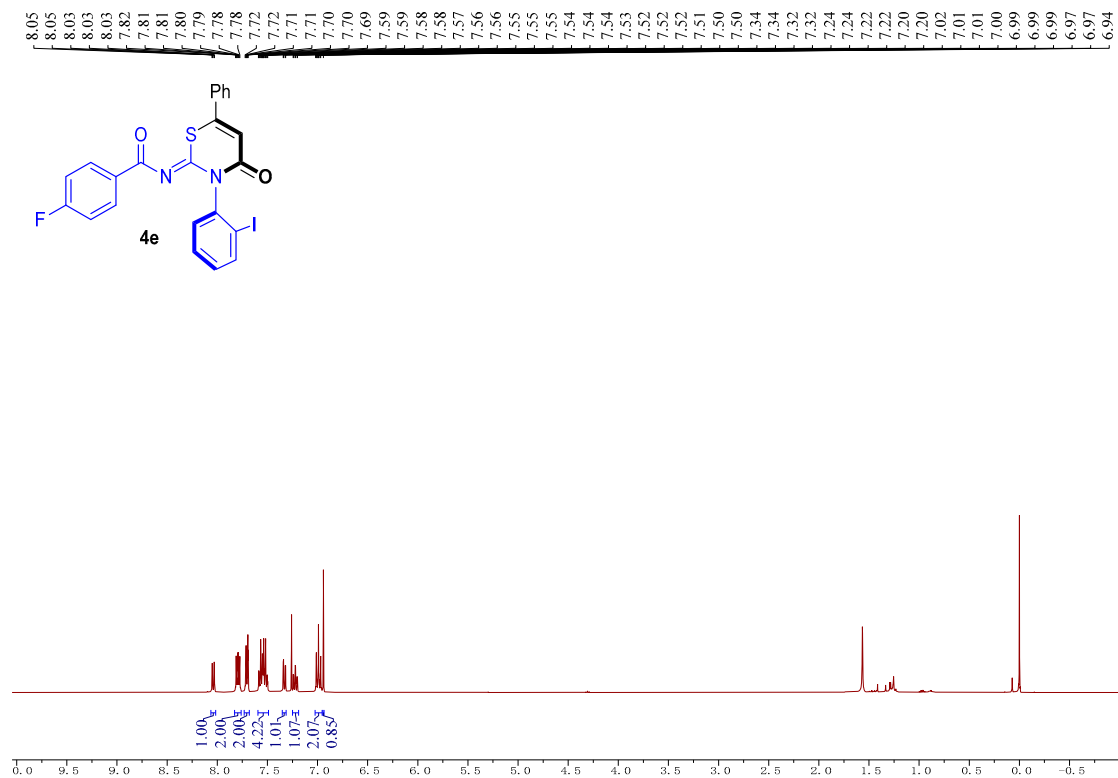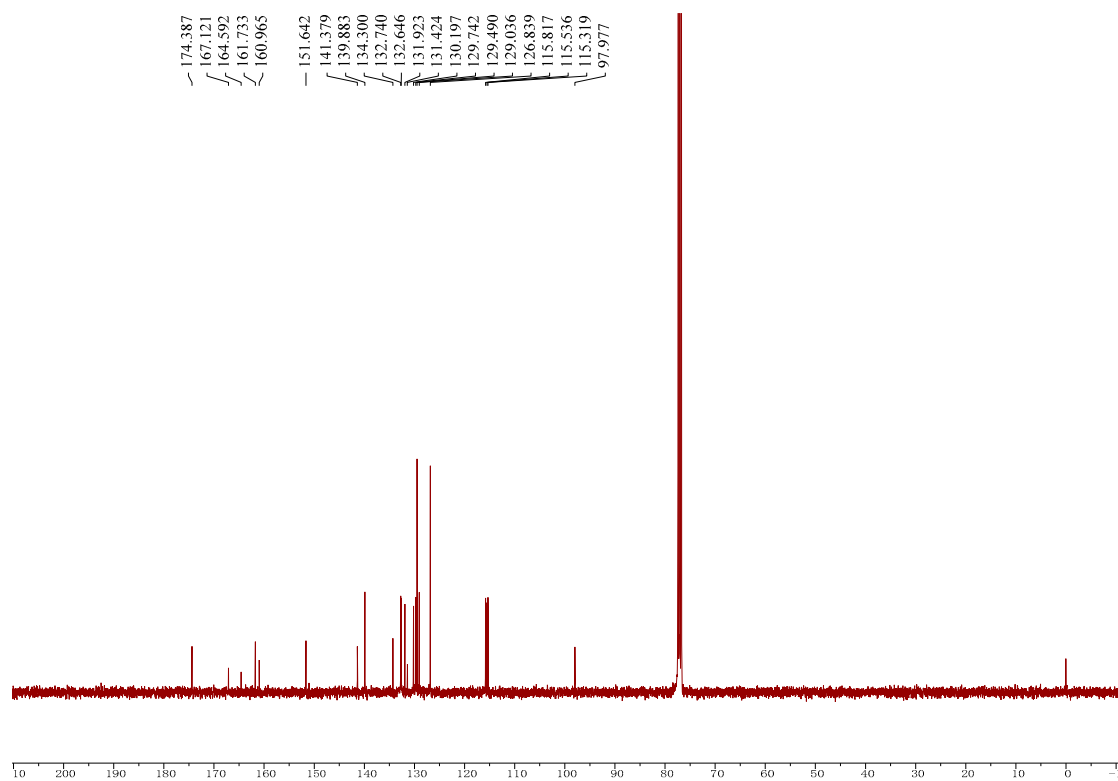

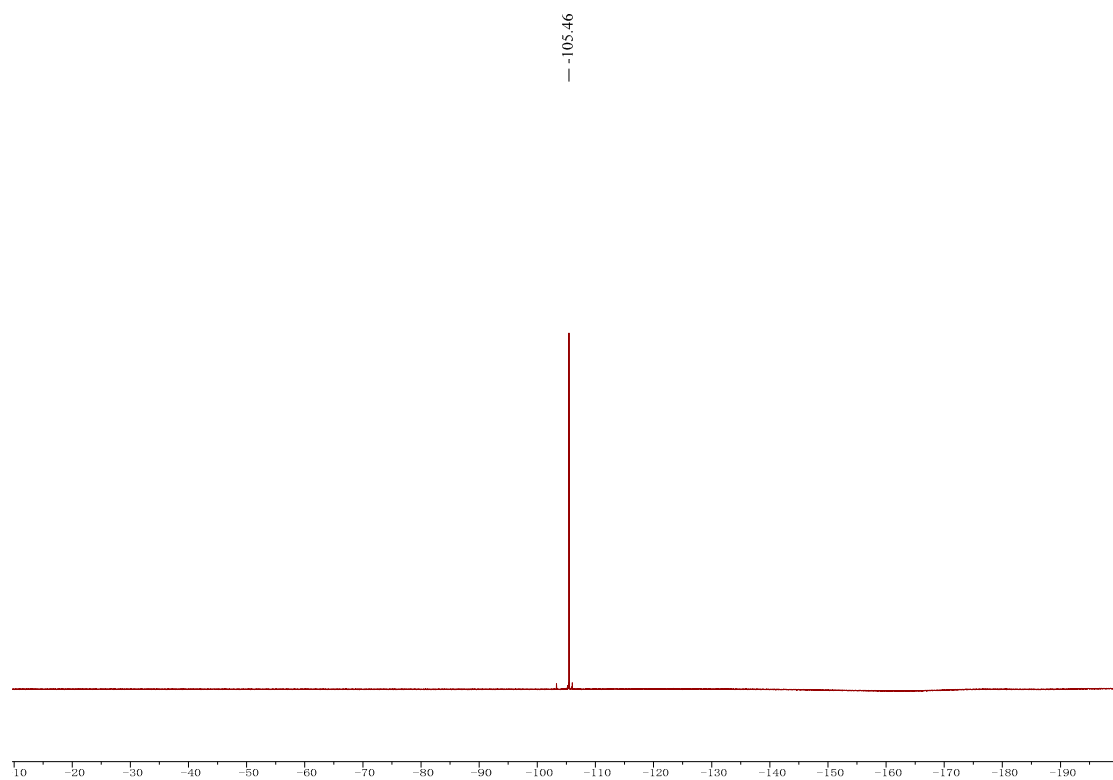

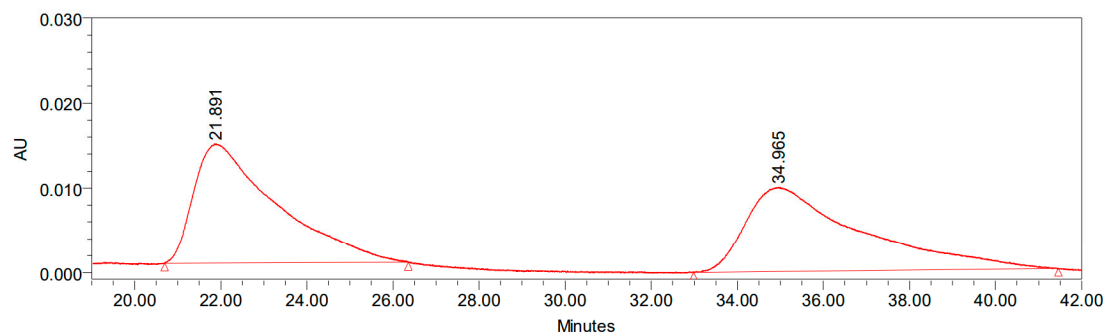

|   | RT     | Area    | % Area | Height |
|---|--------|---------|--------|--------|
| 1 | 21.891 | 1886104 | 50.47  | 14098  |
| 2 | 34.965 | 1851204 | 49.53  | 9986   |

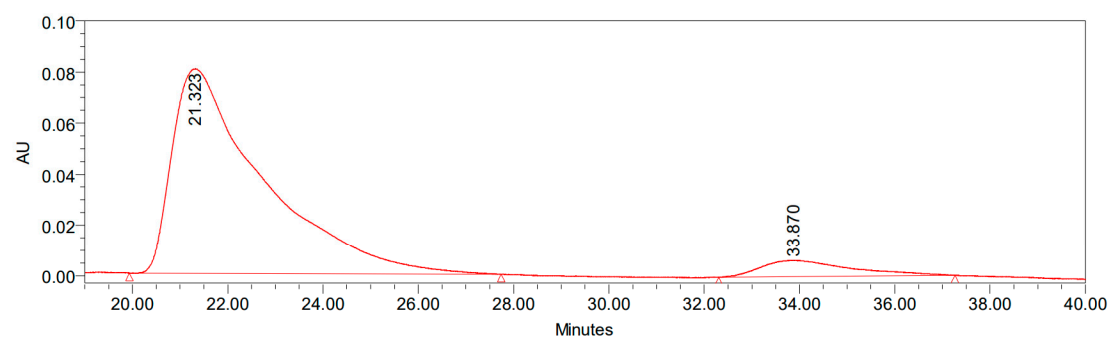

|   | RT     | Area     | % Area | Height |
|---|--------|----------|--------|--------|
| 1 | 21.323 | 10667492 | 92.77  | 80433  |
| 2 | 33.870 | 830960   | 7.23   | 6390   |

**(Z)-4-chloro-N-(3-(2-iodophenyl)-4-oxo-6-phenyl-3,4-dihydro-2H-1,3-thiazin-2-ylidene)benzamide (4f)**

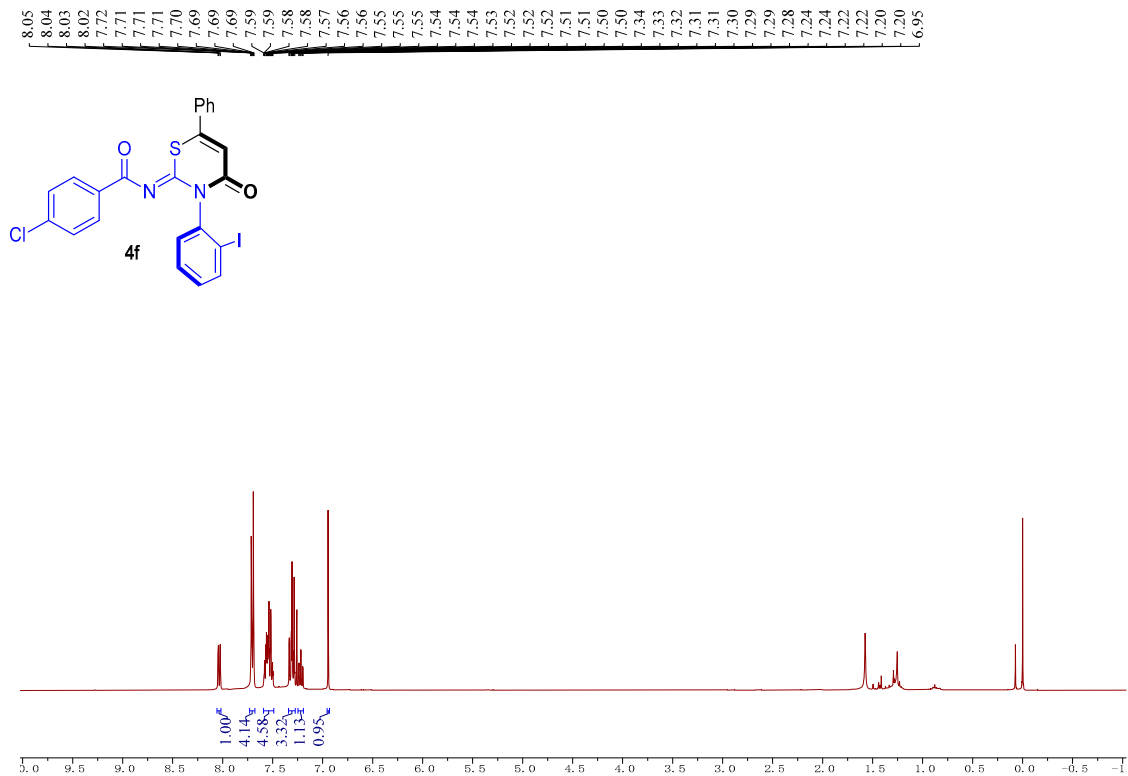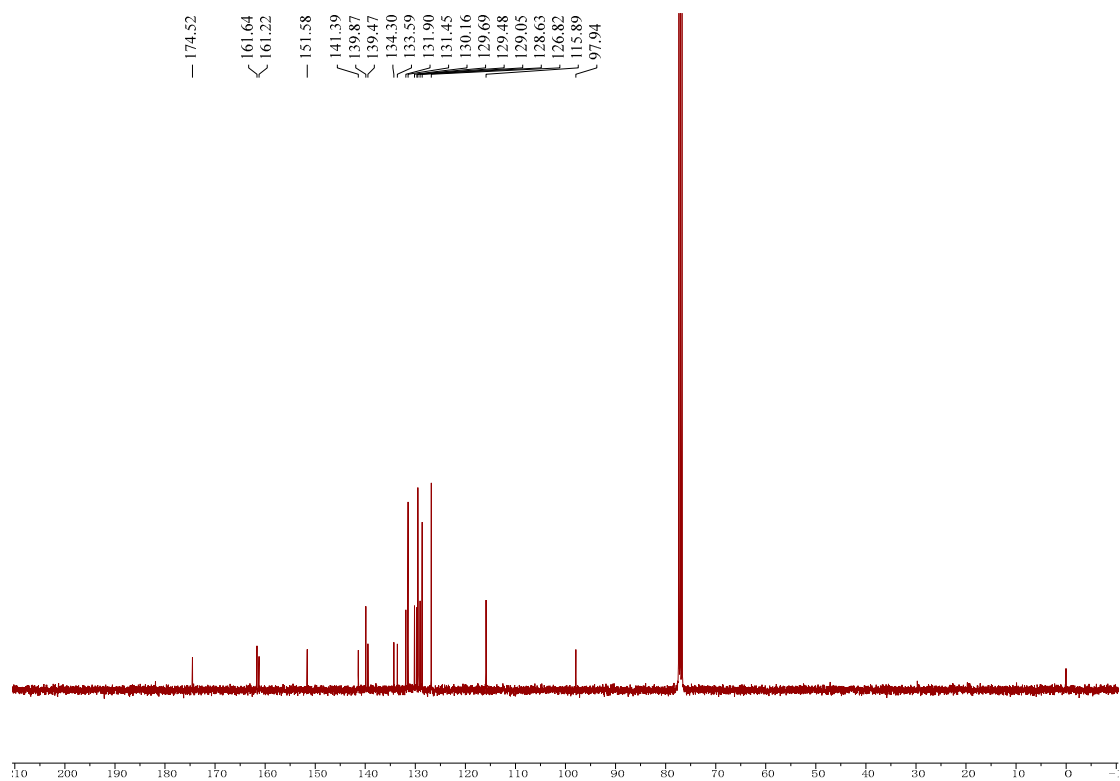



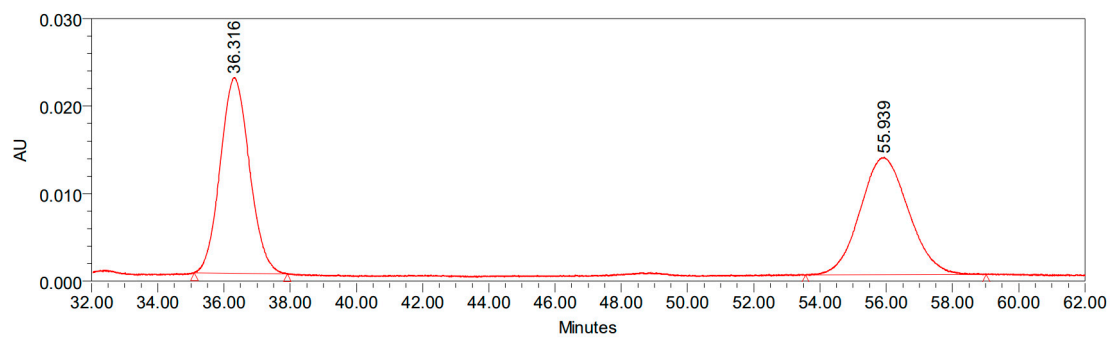

|   | RT     | Area    | % Area | Height |
|---|--------|---------|--------|--------|
| 1 | 36.316 | 1367728 | 50.26  | 22338  |
| 2 | 55.939 | 1353416 | 49.74  | 13387  |

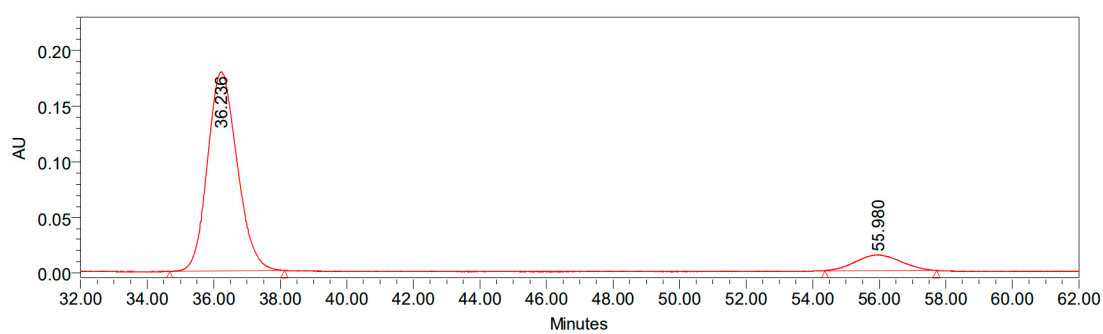

|   | RT     | Area     | % Area | Height |
|---|--------|----------|--------|--------|
| 1 | 36.236 | 11102354 | 89.55  | 179081 |
| 2 | 55.980 | 1295399  | 10.45  | 13764  |

**(Z)-4-bromo-N-(3-(2-iodophenyl)-4-oxo-6-phenyl-3,4-dihydro-2H-1,3-thiazin-2-ylidene)benzamide (4g)**

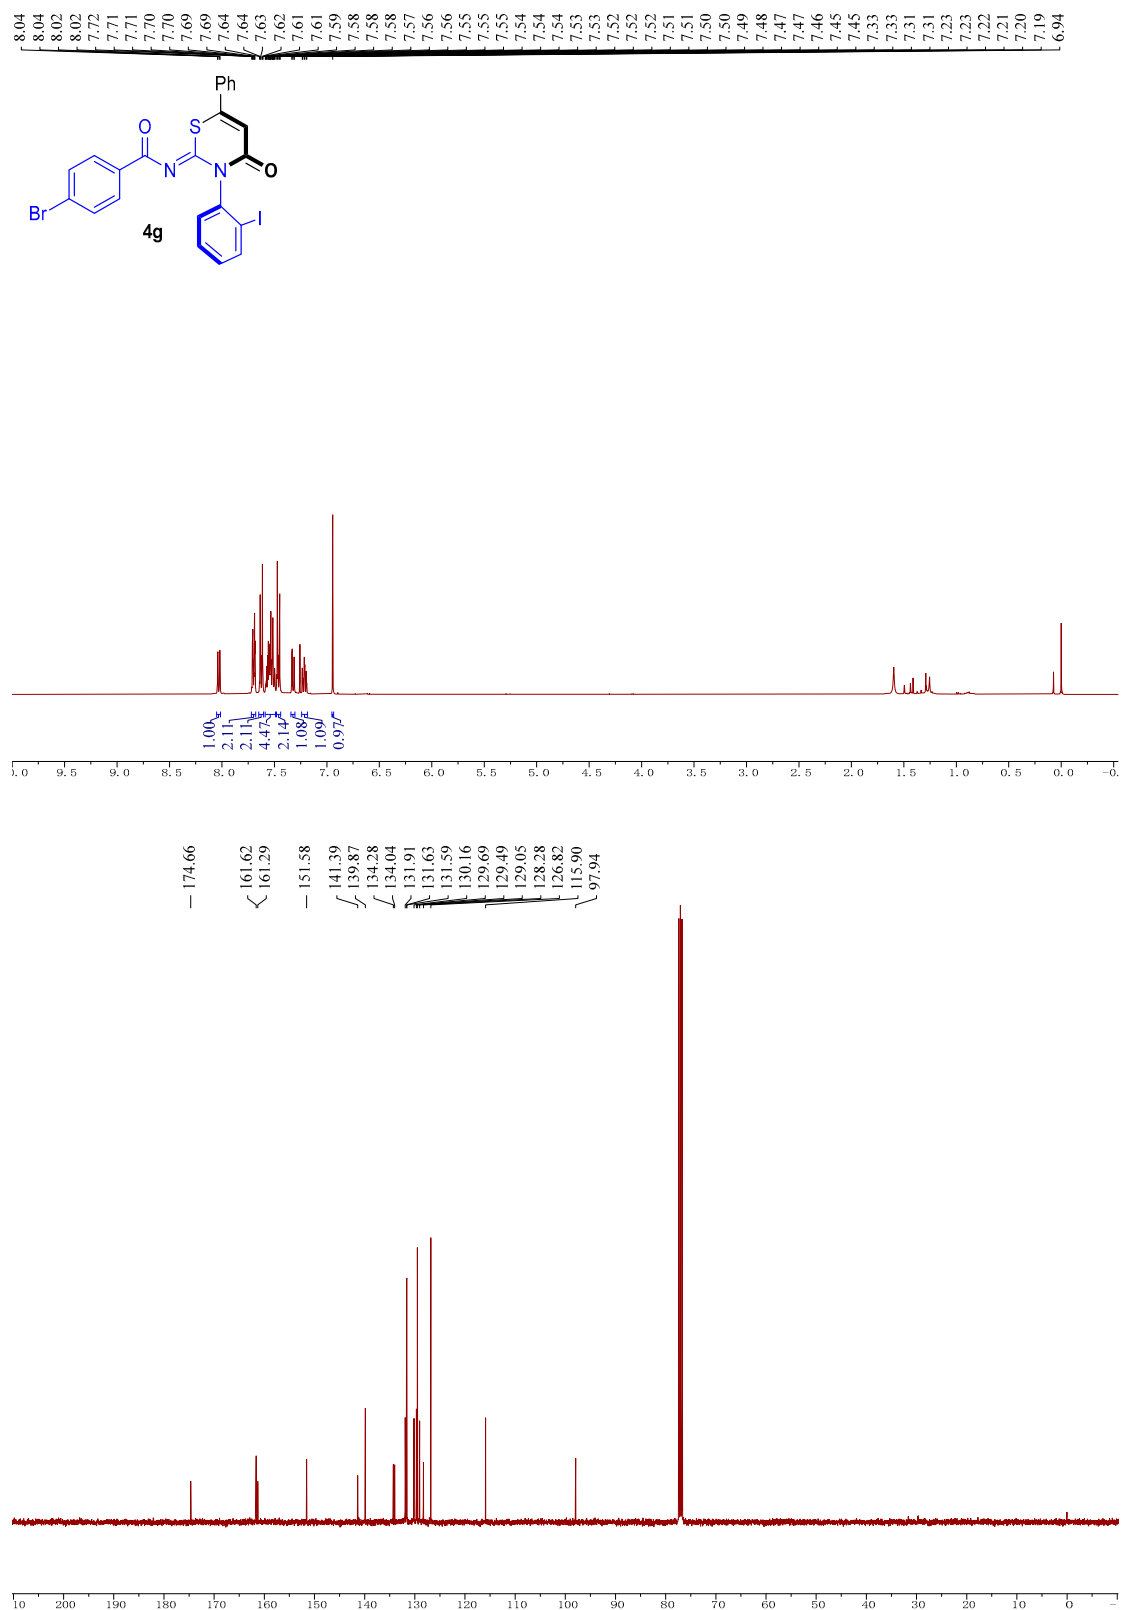

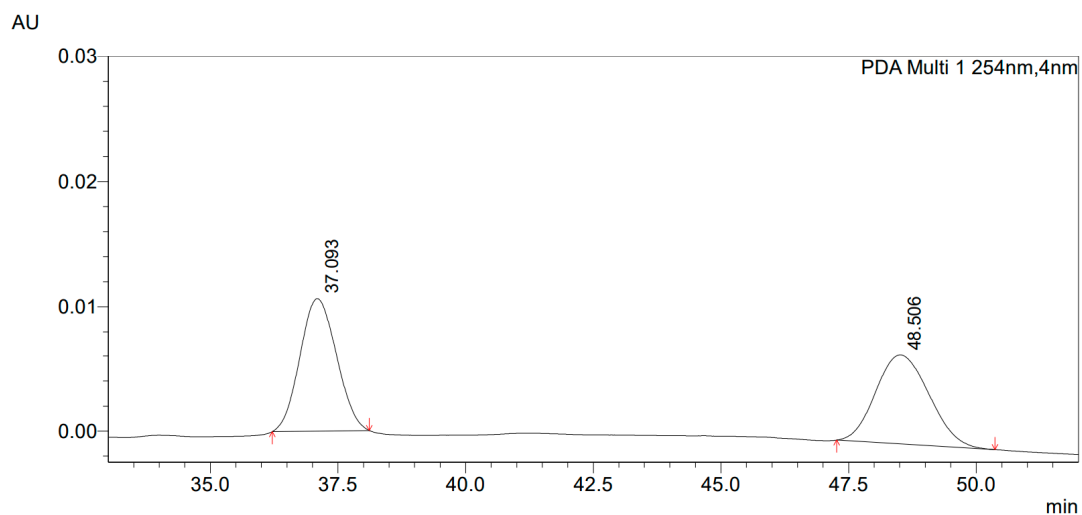

PDA Ch1 254nm

| Peak# | Ret. Time | Area    | Height | Area%   |
|-------|-----------|---------|--------|---------|
| 1     | 37.093    | 529667  | 10658  | 50.587  |
| 2     | 48.506    | 517367  | 7113   | 49.413  |
| Total |           | 1047034 | 17770  | 100.000 |

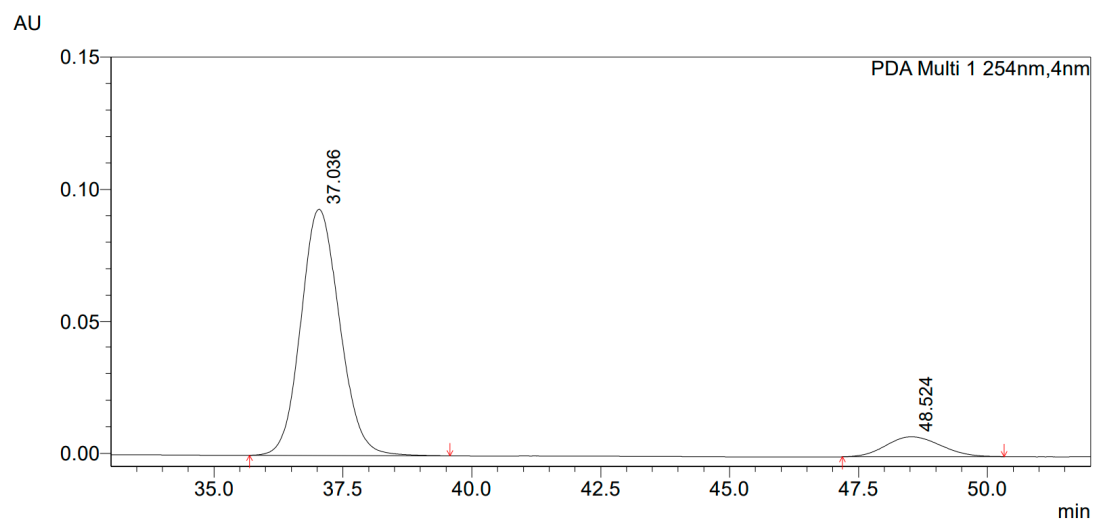

PDA Ch1 254nm

| Peak# | Ret. Time | Area    | Height | Area%   |
|-------|-----------|---------|--------|---------|
| 1     | 37.036    | 4880056 | 93292  | 89.822  |
| 2     | 48.524    | 552978  | 7489   | 10.178  |
| Total |           | 5433034 | 100781 | 100.000 |

**(Z)-3-fluoro-N-(3-(2-iodophenyl)-4-oxo-6-phenyl-3,4-dihydro-2H-1,3-thiazin-2-ylidene)benzamide (4h)**

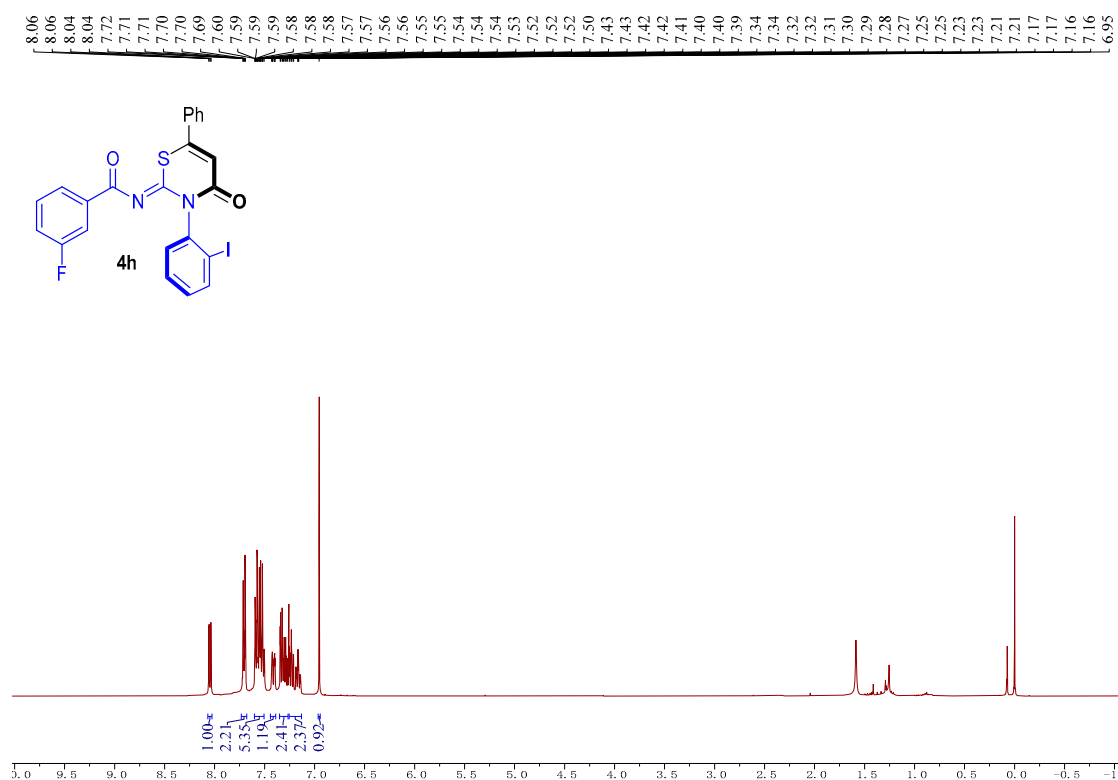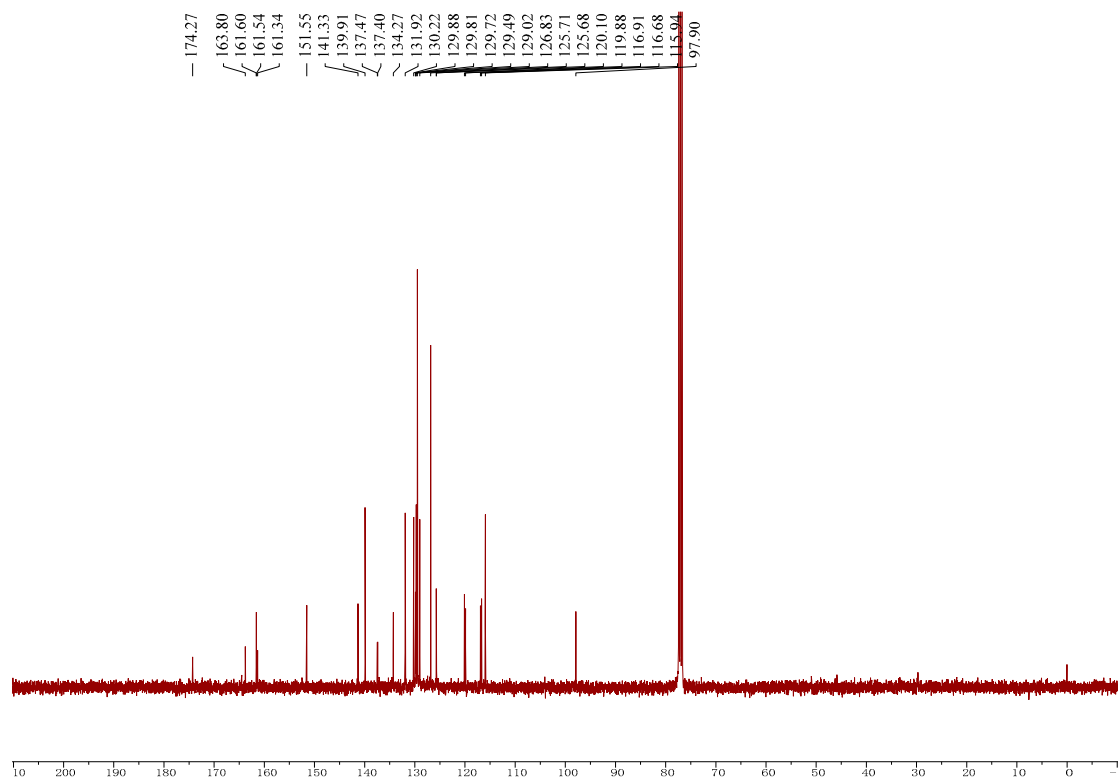

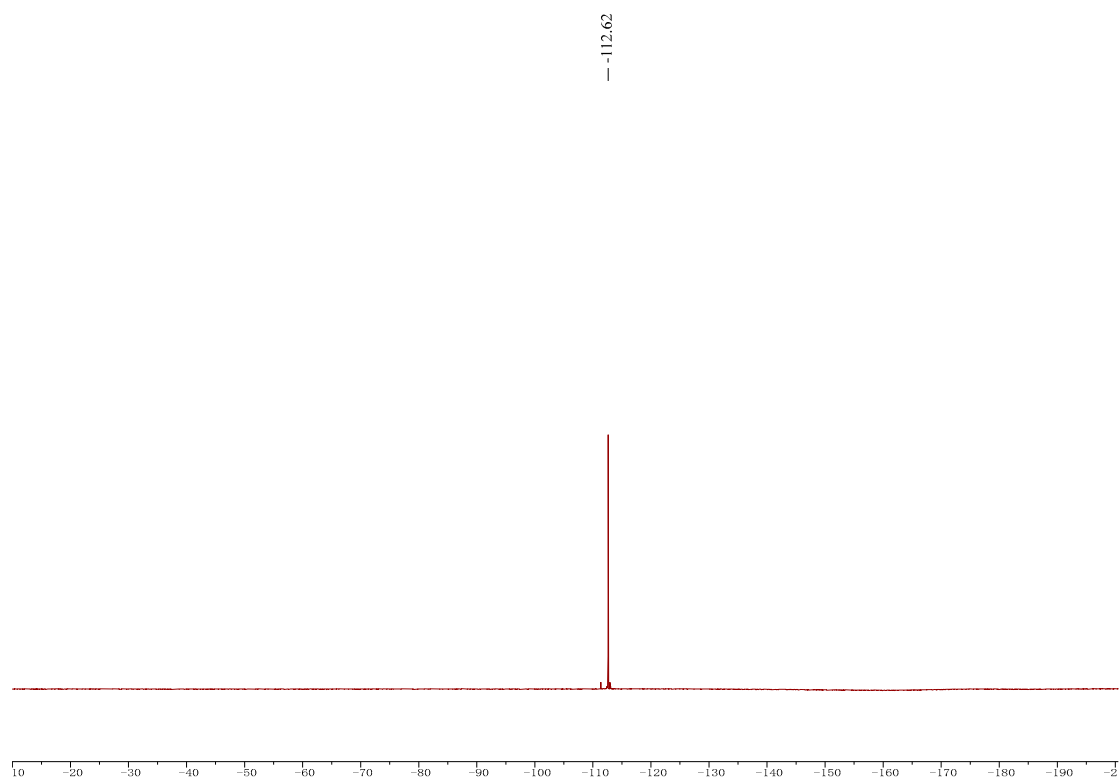

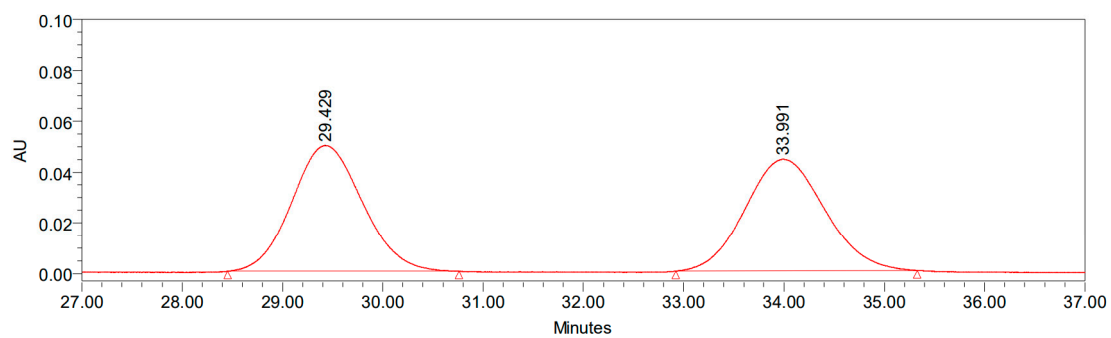

|   | RT     | Area    | % Area | Height |
|---|--------|---------|--------|--------|
| 1 | 29.429 | 2437075 | 50.02  | 49656  |
| 2 | 33.991 | 2434905 | 49.98  | 44073  |

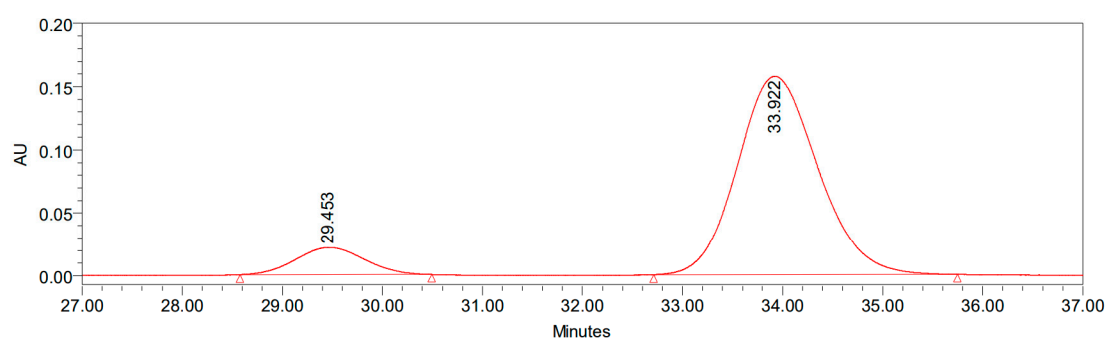

|   | RT     | Area    | % Area | Height |
|---|--------|---------|--------|--------|
| 1 | 29.453 | 1026068 | 10.45  | 21446  |
| 2 | 33.922 | 8790682 | 89.55  | 157140 |

**(Z)-3-chloro-N-(3-(2-iodophenyl)-4-oxo-6-phenyl-3,4-dihydro-2H-1,3-thiazin-2-ylidene)benzamide (4i)**

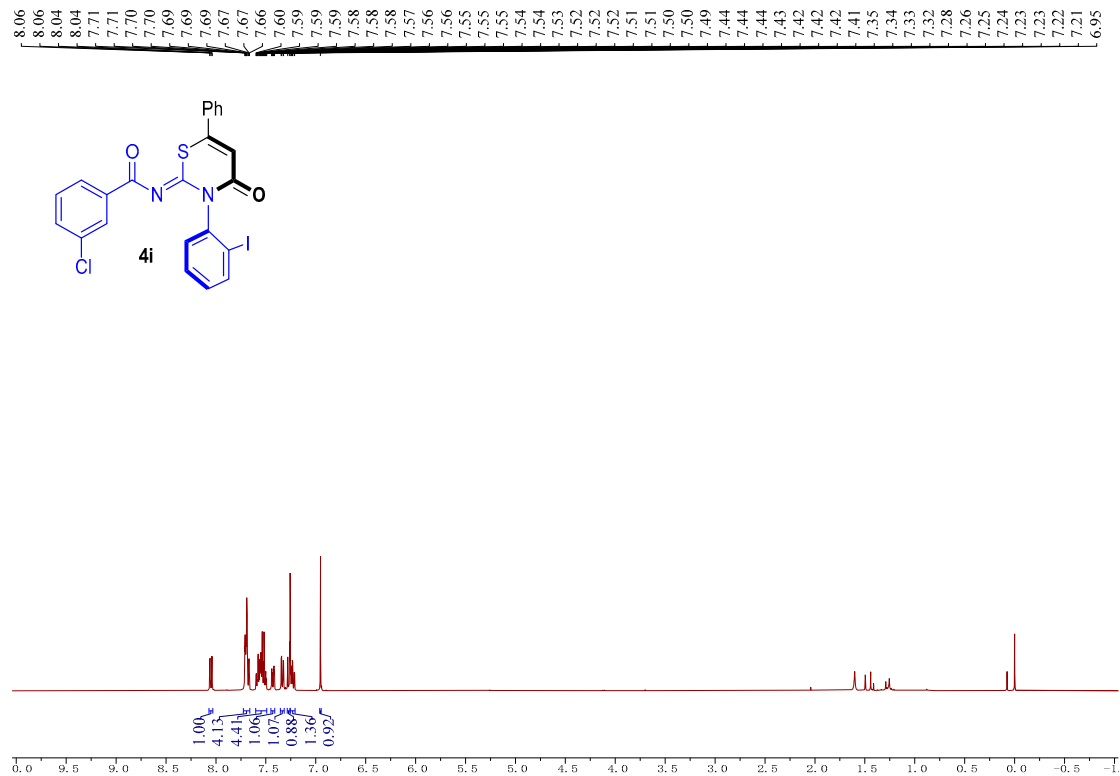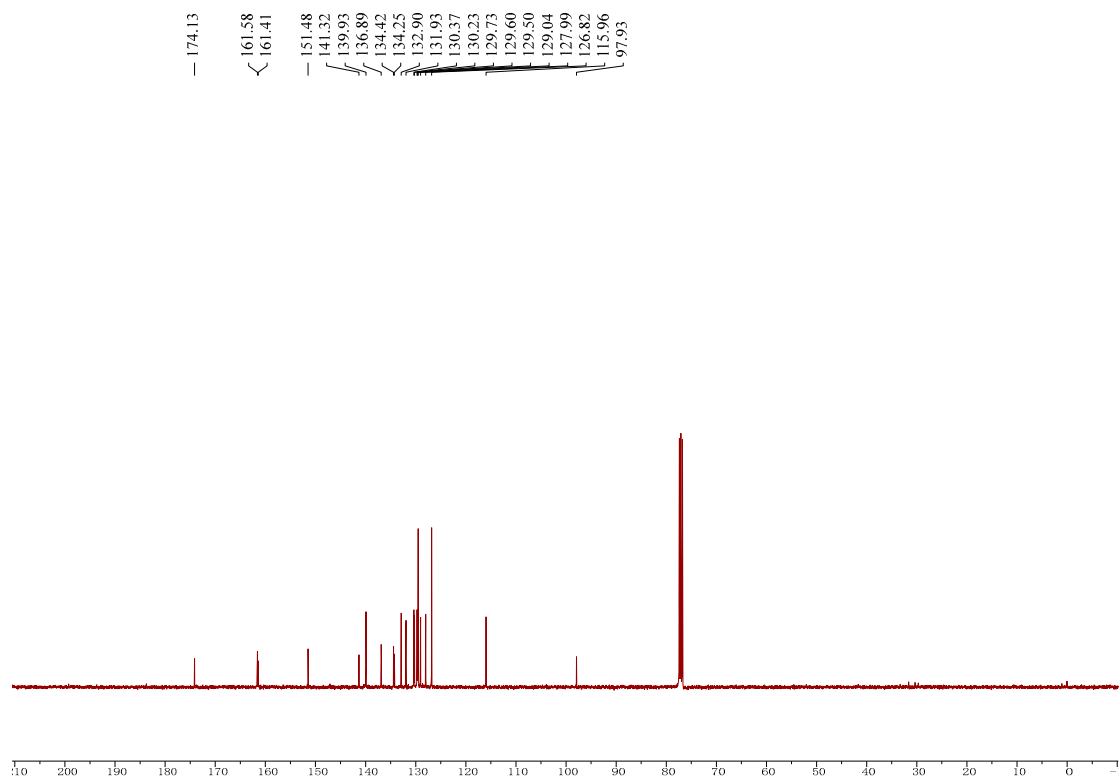

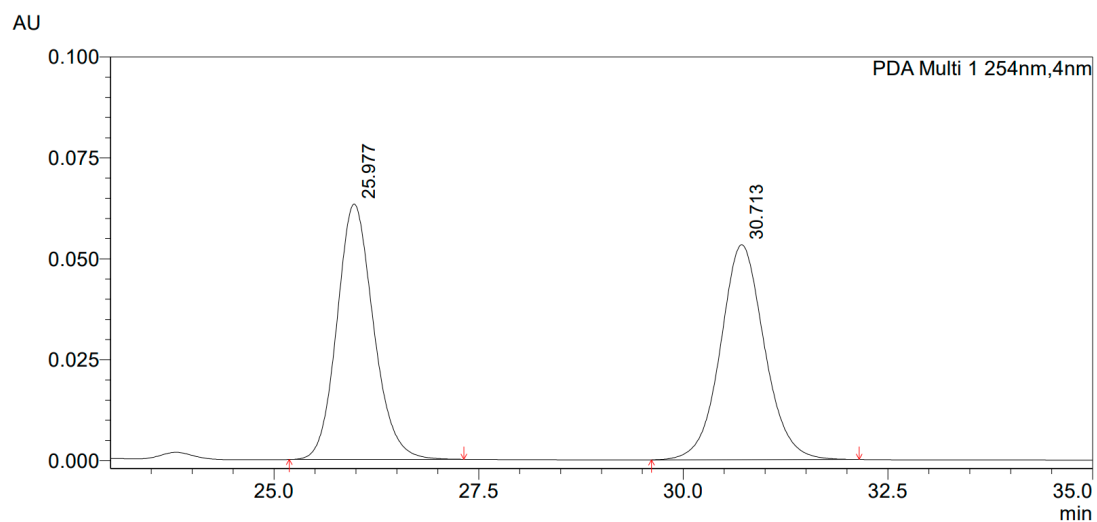

PDA Ch1 254nm

| Peak# | Ret. Time | Area    | Height | Area%   |
|-------|-----------|---------|--------|---------|
| 1     | 25.977    | 1965216 | 63276  | 49.645  |
| 2     | 30.713    | 1993339 | 53242  | 50.355  |
| Total |           | 3958556 | 116518 | 100.000 |

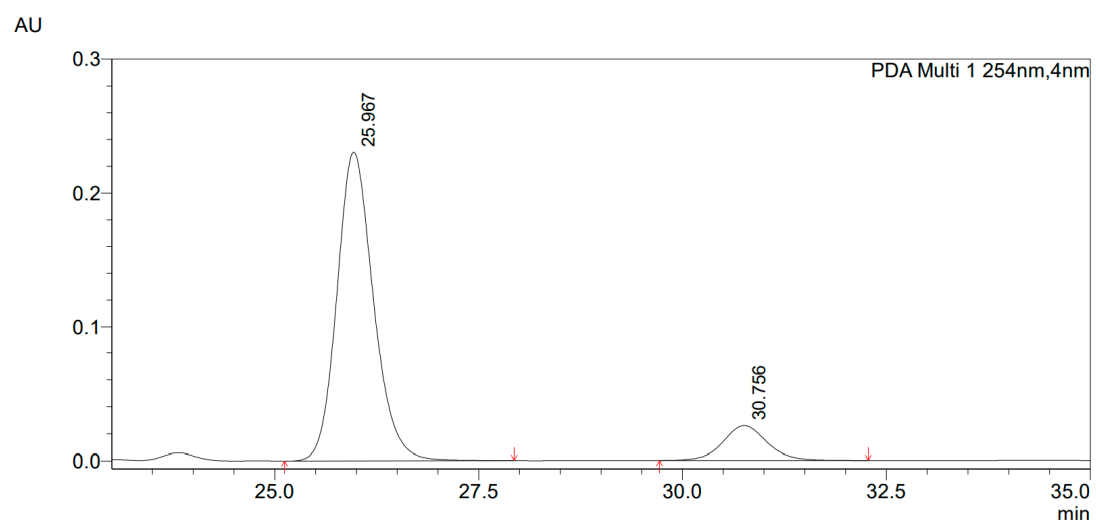

PDA Ch1 254nm

| Peak# | Ret. Time | Area    | Height | Area%   |
|-------|-----------|---------|--------|---------|
| 1     | 25.967    | 7170221 | 230509 | 88.231  |
| 2     | 30.756    | 956423  | 25506  | 11.769  |
| Total |           | 8126644 | 256015 | 100.000 |



**(Z)-3-bromo-N-(3-(2-iodophenyl)-4-oxo-6-phenyl-3,4-dihydro-2H-1,3-thiazin-2-ylidene)benzamide (4j)**

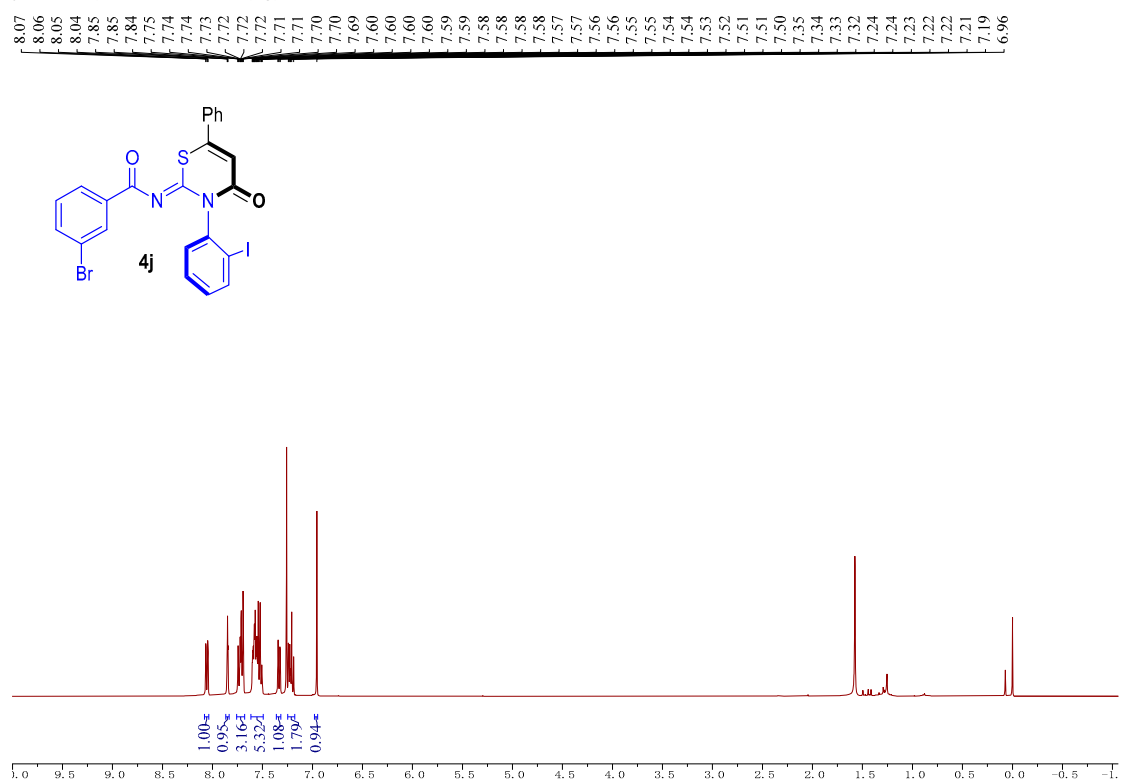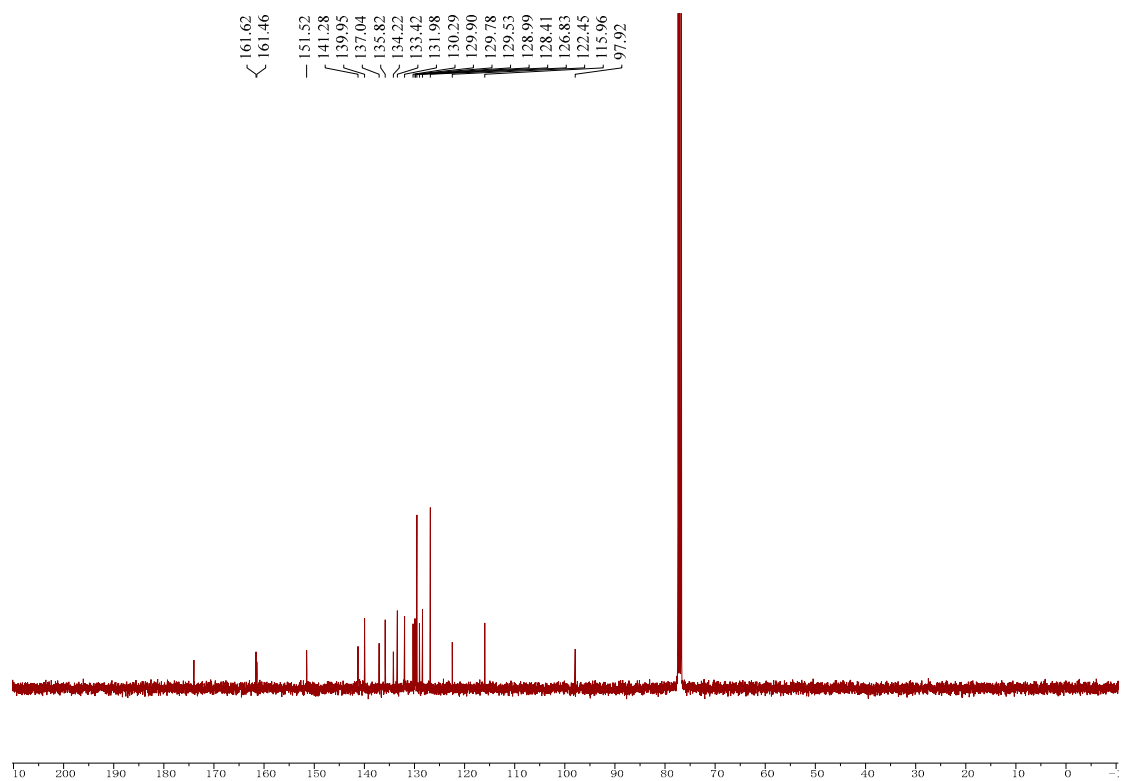

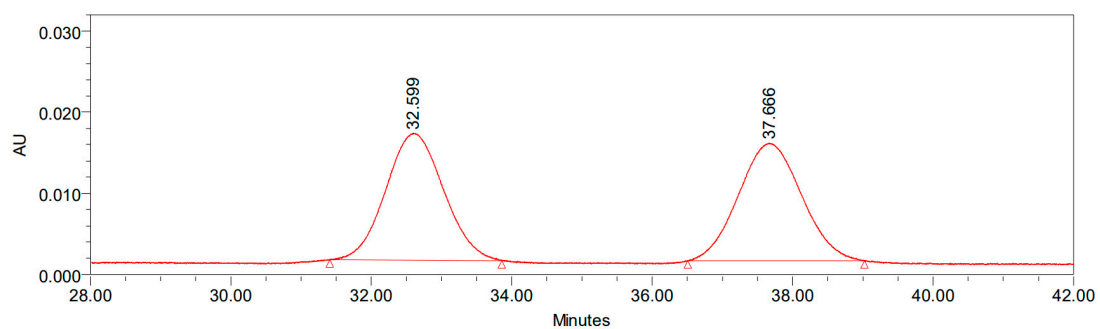

|   | RT     | Area   | % Area | Height |
|---|--------|--------|--------|--------|
| 1 | 32.599 | 890809 | 49.71  | 15596  |
| 2 | 37.666 | 901377 | 50.29  | 14472  |

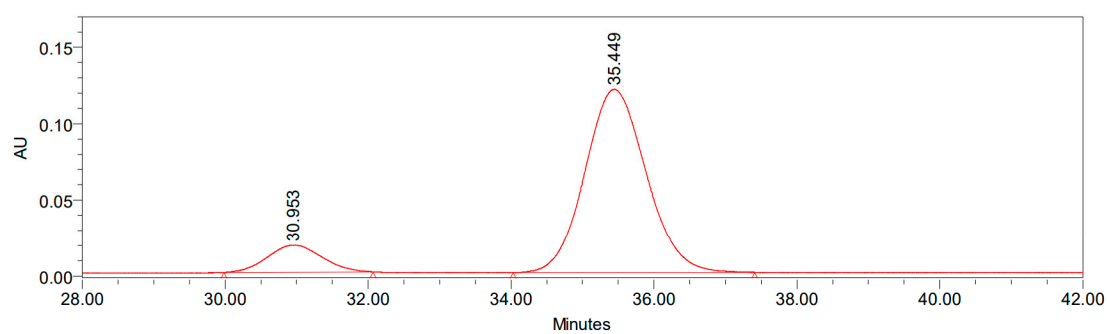

|   | RT     | Area    | % Area | Height |
|---|--------|---------|--------|--------|
| 1 | 30.953 | 927673  | 11.45  | 17650  |
| 2 | 35.449 | 7170749 | 88.55  | 120316 |

**(Z)-2-fluoro-N-(3-(2-iodophenyl)-4-oxo-6-phenyl-3,4-dihydro-2H-1,3-thiazin-2-ylidene)benzamide (4k)**

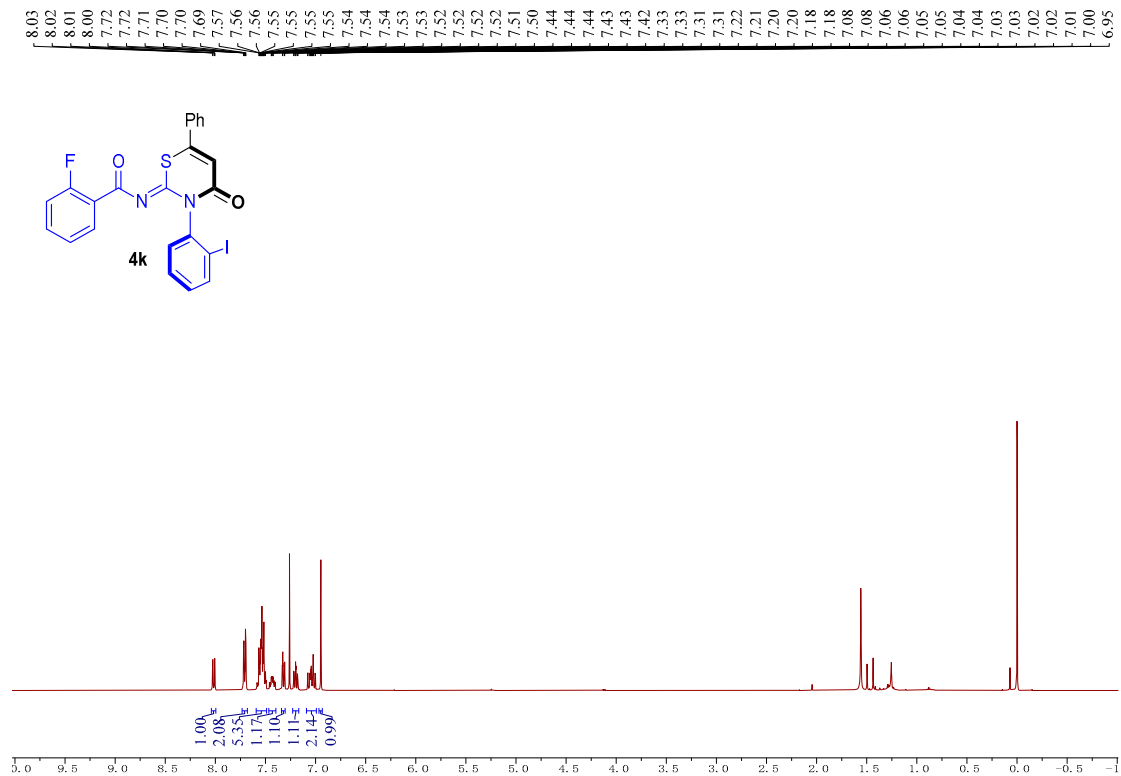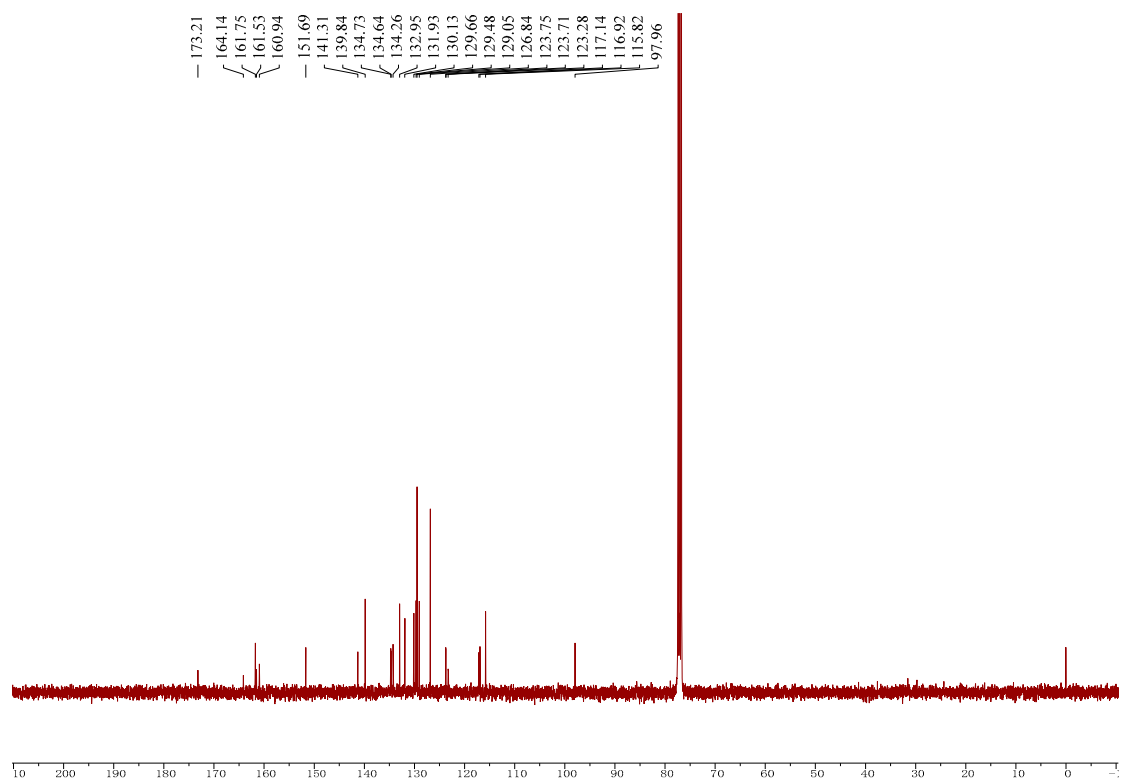

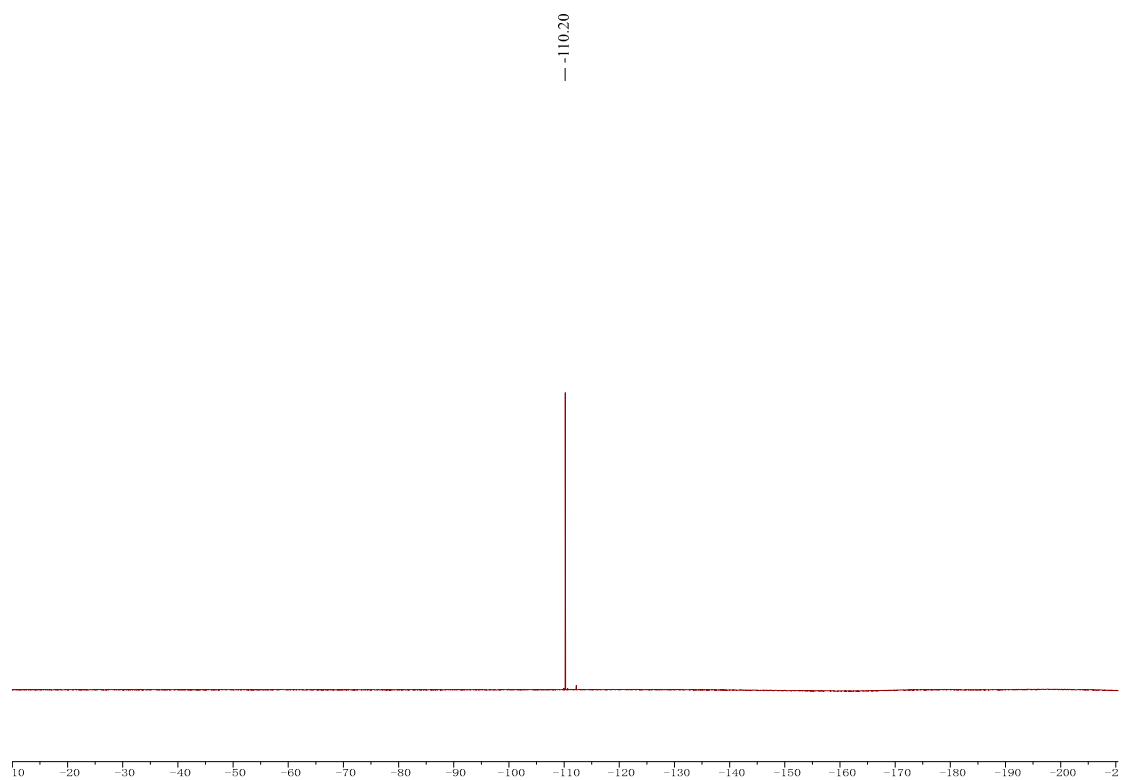

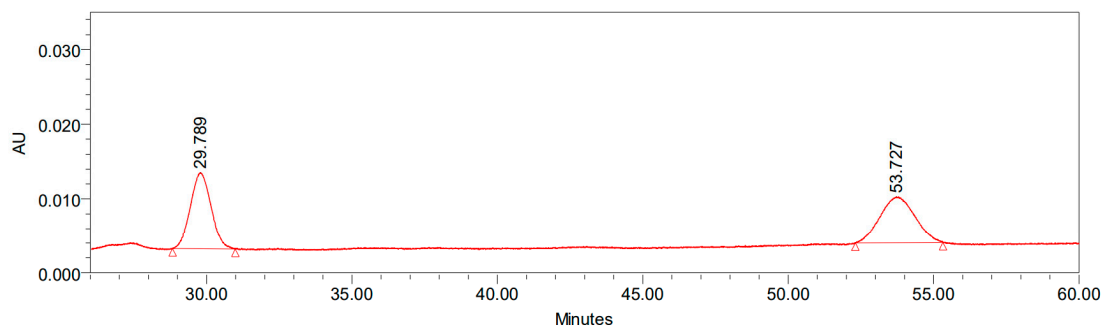

|   | RT     | Area   | % Area | Height |
|---|--------|--------|--------|--------|
| 1 | 29.789 | 509287 | 49.53  | 10299  |
| 2 | 53.727 | 518996 | 50.47  | 6198   |

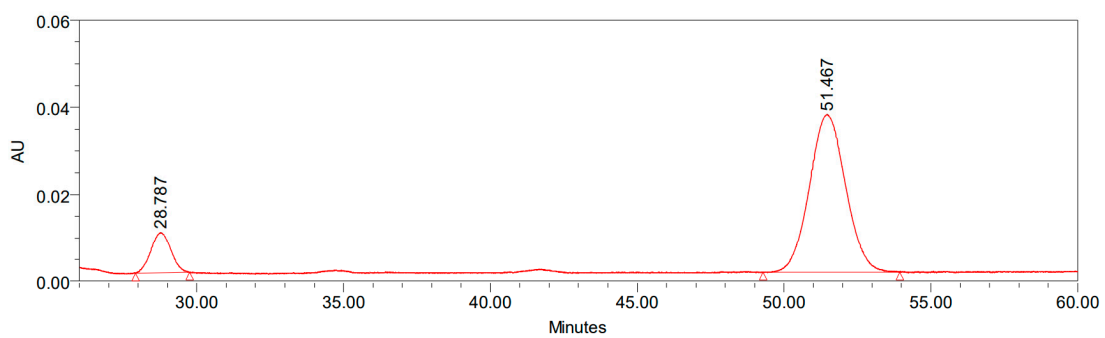

|   | RT     | Area    | % Area | Height |
|---|--------|---------|--------|--------|
| 1 | 28.787 | 437775  | 12.30  | 9393   |
| 2 | 51.467 | 3122026 | 87.70  | 36314  |

**(Z)-2-chloro-N-(3-(2-iodophenyl)-4-oxo-6-phenyl-3,4-dihydro-2H-1,3-thiazin-2-ylidene)benzamide (4l)**

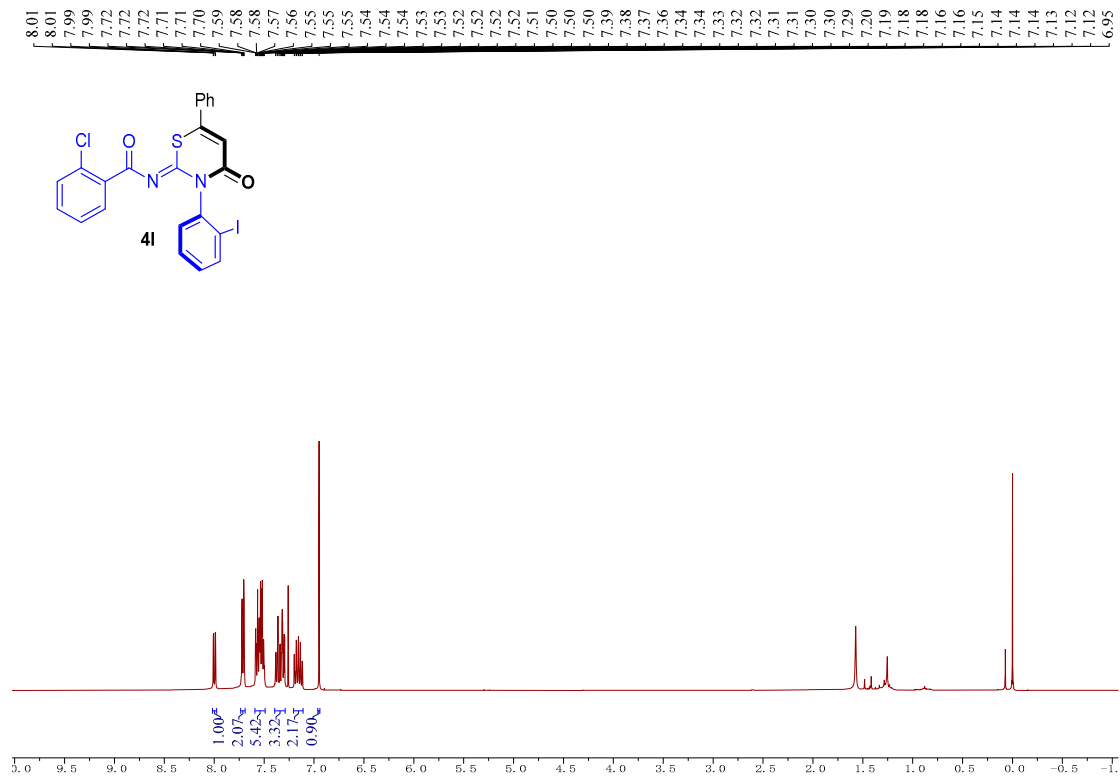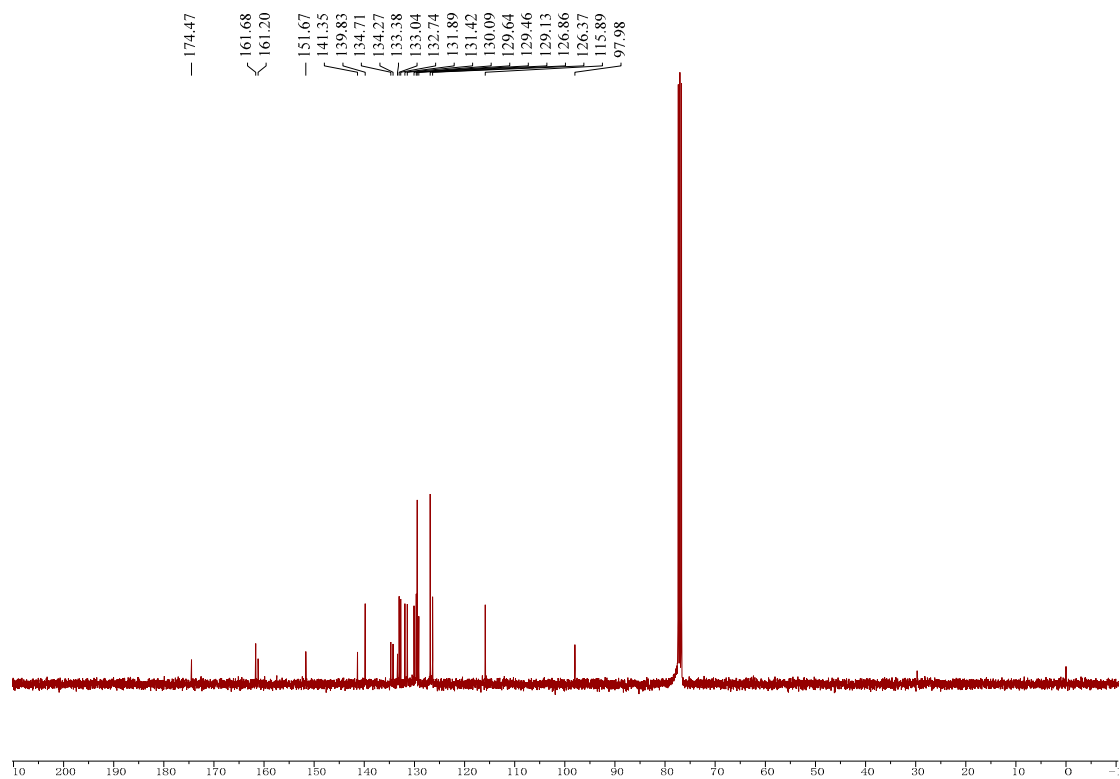

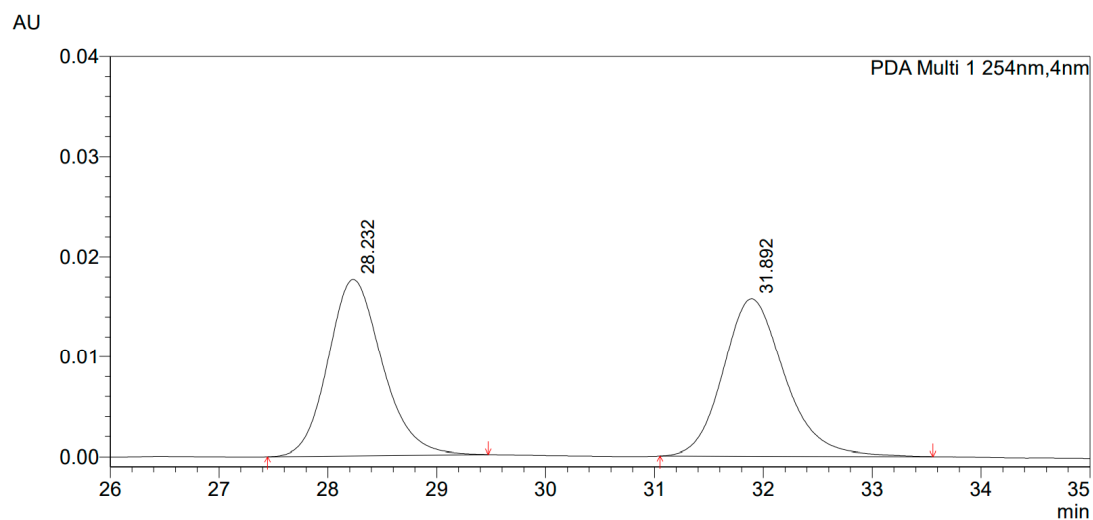

PDA Ch1 254nm

| Peak# | Ret. Time | Area    | Height | Area%   |
|-------|-----------|---------|--------|---------|
| 1     | 28.232    | 610289  | 17668  | 49.723  |
| 2     | 31.892    | 617086  | 15756  | 50.277  |
| Total |           | 1227374 | 33423  | 100.000 |

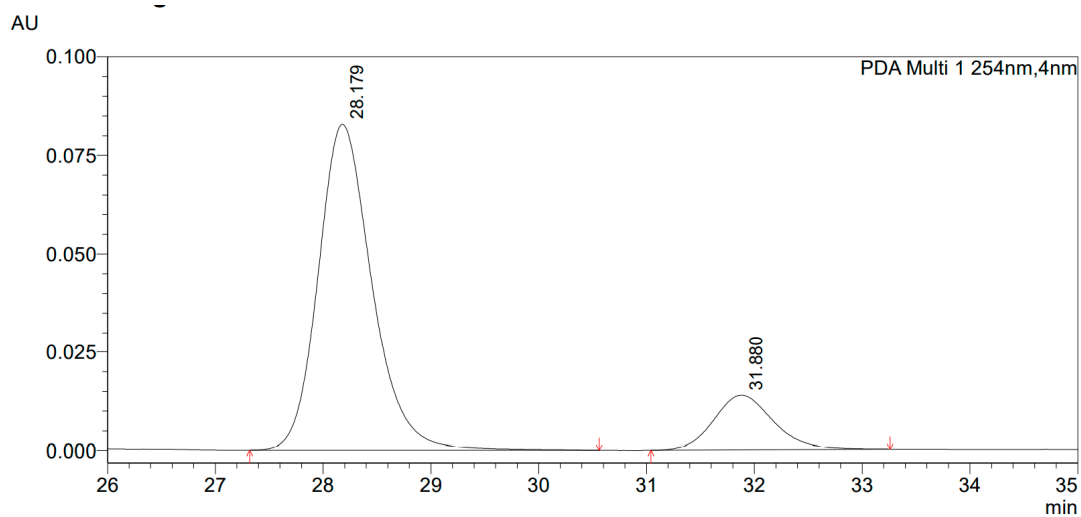

PDA Ch1 254nm

| Peak# | Ret. Time | Area    | Height | Area%   |
|-------|-----------|---------|--------|---------|
| 1     | 28.179    | 2876424 | 82776  | 84.349  |
| 2     | 31.880    | 533741  | 13817  | 15.651  |
| Total |           | 3410165 | 96593  | 100.000 |

**(Z)-2-bromo-N-(3-(2-iodophenyl)-4-oxo-6-phenyl-3,4-dihydro-2H-1,3-thiazin-2-ylidene)benzamide (4m)**

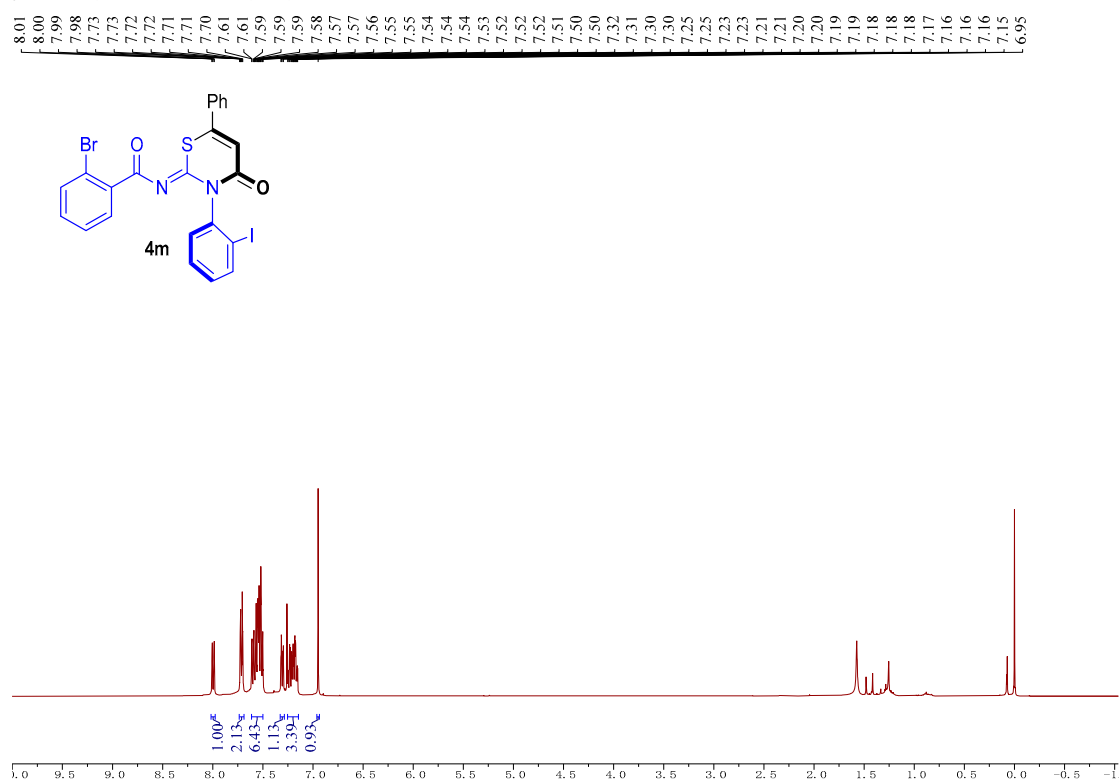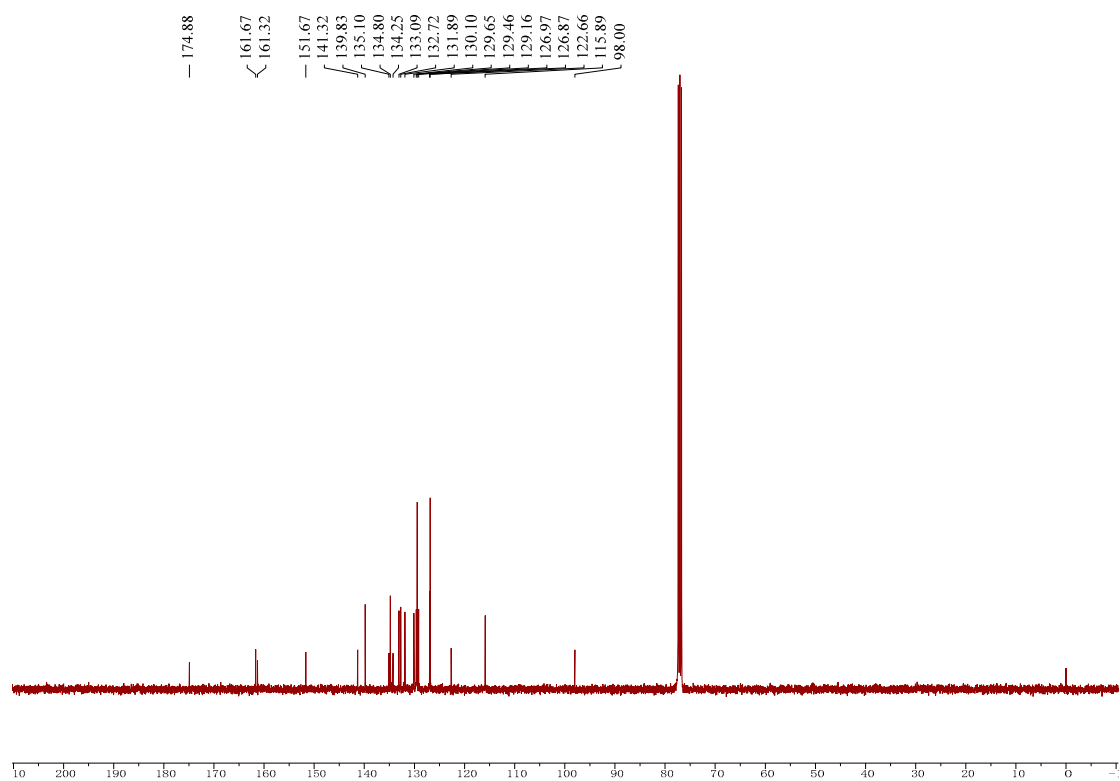



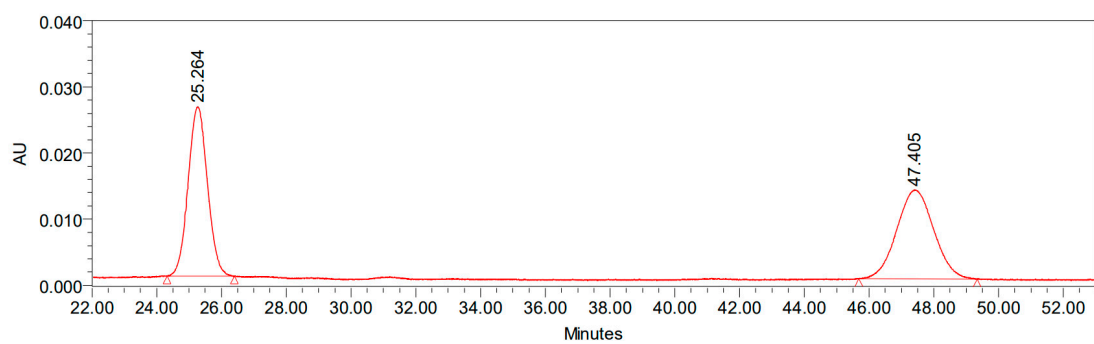

|   | RT     | Area    | % Area | Height |
|---|--------|---------|--------|--------|
| 1 | 25.264 | 1061341 | 49.96  | 25580  |
| 2 | 47.405 | 1063158 | 50.04  | 13430  |

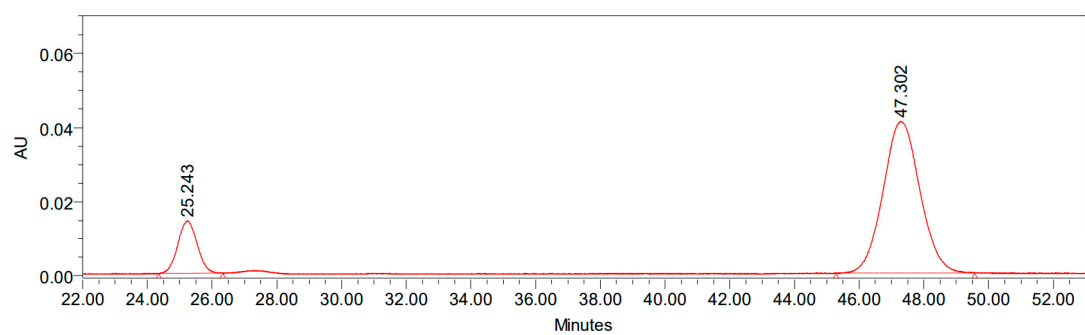

|   | RT     | Area    | % Area | Height |
|---|--------|---------|--------|--------|
| 1 | 25.243 | 583030  | 15.25  | 14281  |
| 2 | 47.302 | 3241262 | 84.75  | 40945  |
